# Supplementary material
Source: PubMed Central journal article supplement (PMC3487488)
Supplement: supp_12-10448_iovs-12-10448-s01.pdf [file supp_12-10448_iovs-12-10448-s01.pdf]

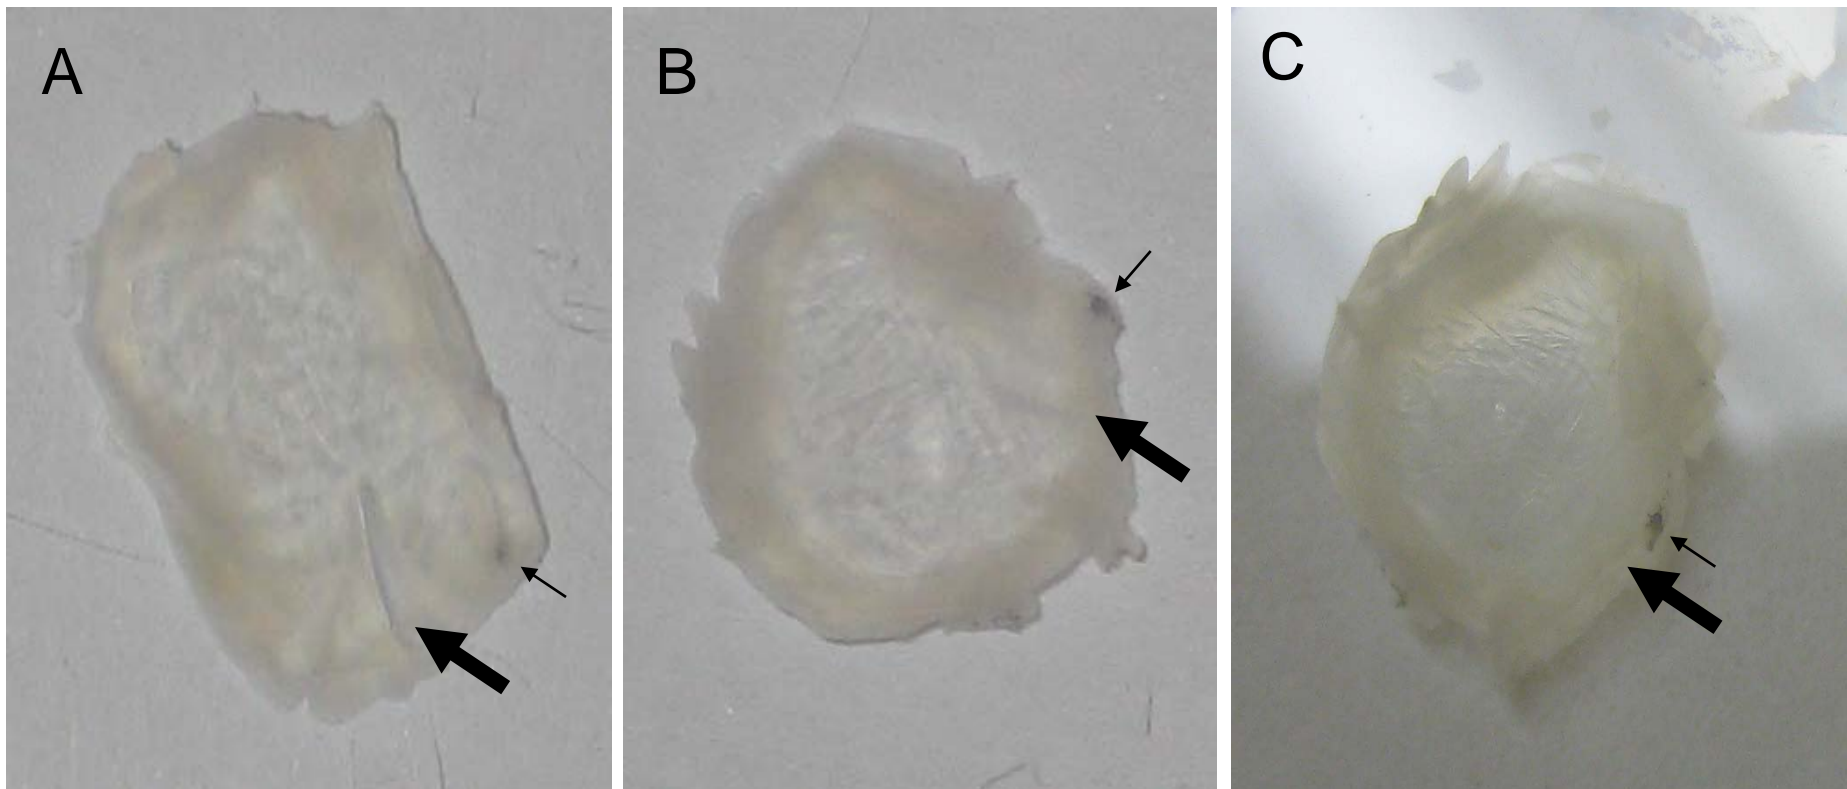

Supplemental Figure 1. The effect of lipids generated from 11 M NaOH 30 second exposure to cornea and enriched in hydroxyapatite matrix\* after neutralization using Tris-Cl buffer pH 6.5. The metabolically active human corneas derived within 12 hours of postmortem and enucleation were used in subsequent experiments for determination of their healing properties as shown here. A. The cornea on day zero subjected to excision with a scalpel shown by a thick arrow. The thin arrow shows the location of the attached iris to note the location during the entire period of incubation. After excision the cornea was pulled together and applied with enriched lipids from 11 M NaOH 30 second exposure. B. The cornea in the panel A after incubation at 37C for three days. C. The cornea as in panel A and B after 7days. The thick arrow in panel B and C indicate approximately the region of excision where the lipids were applied. All operations were carried out in a sterile atmosphere using sterile solutions.

\*The human cornea under incubation for 72-106 hours in either PBS or Optisol GS was procured and splashed with 11 M NaOH for 30 seconds, subjected to immediate neutralization with Tris-Cl pH 6.5 and washed with sterile water. The lipids were then extracted with Bligh and Dyer method and enriched in hydroxyapatite matrix\* in batch mode using about 100  $\mu$ l of packed matrix. The lipids were eluted with 250 mM phosphate buffer pH 7.0 and preliminary analyses showed predominance of phospholipids in the eluted fractions.

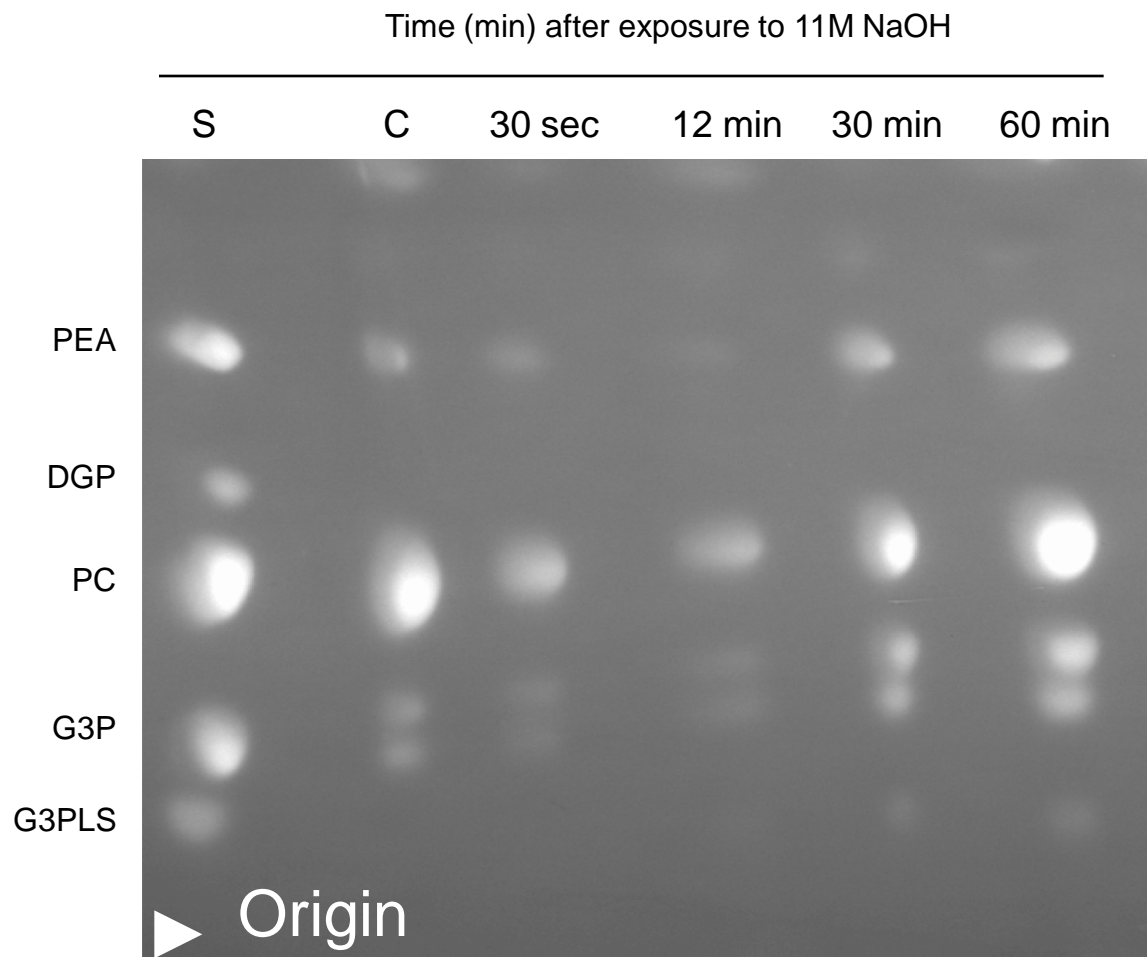

Supplemental Figure 2. Thin layer chromatography of lipids recovered from bovine corneas after exposure to alkali for indicated time periods. The novel spot is indicated with an arrow. S and C denote lipid standards and control (exposure to water only) respectively. Lipid standards are, PEA: 1,2-dioleoyl-sn-glycero-3-phosphoethanolamine; DGP: 1,2-dioleoyl-sn-glycero-3-phosphate; PC: 1,2-dioleoyl-sn-glycero-3-phosphocholine; G3P: 1-oleoyl-2-hydroxy-sn-glycero-3-phosphate; G3PLS: 1-oleoyl-2-hydroxy-sn-glycero-3-phospho-L-serine as indicated.

P20B\_1 control-PC\_6#1-113 RT: 0.00-1.00 AV: 113 NL: 3.31E4  
T: + c ESI Full pr 184.000 [200.000-1000.000]

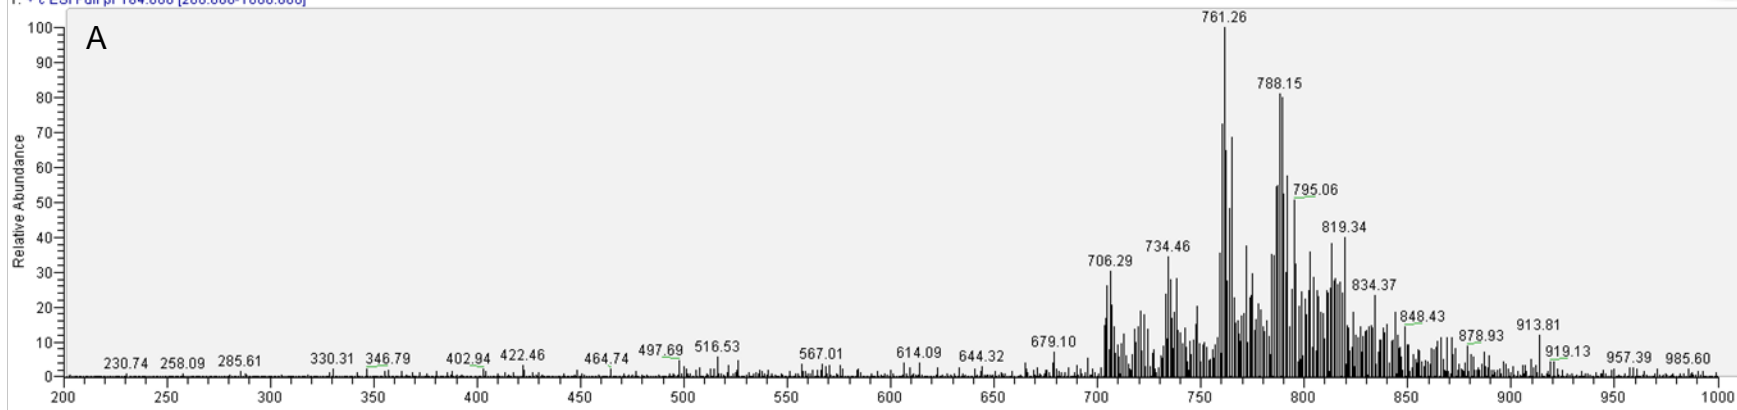

P21A control after 24 H-PC\_8 control #1-113 RT: 0.00-1.00 AV: 113 NL: 5.18E3  
T: + c ESI Full pr 184.000 [200.000-1000.000]

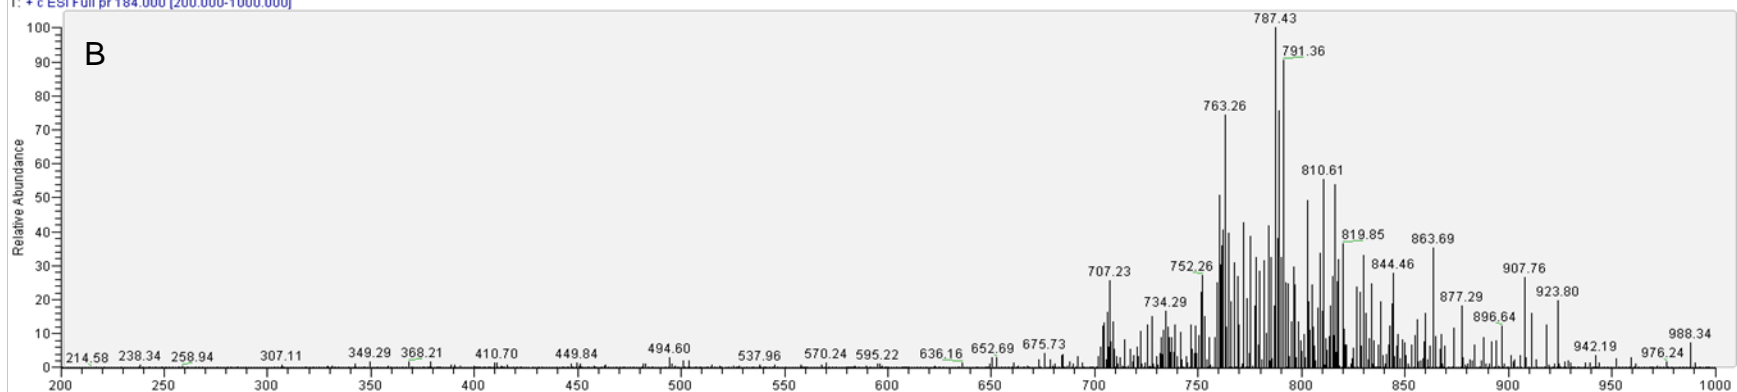

P21B1 control-PC\_4 #1-113 RT: 0.00-1.00 AV: 113 NL: 6.41E3  
T: + c ESI Full pr 184.000 [200.000-1000.000]

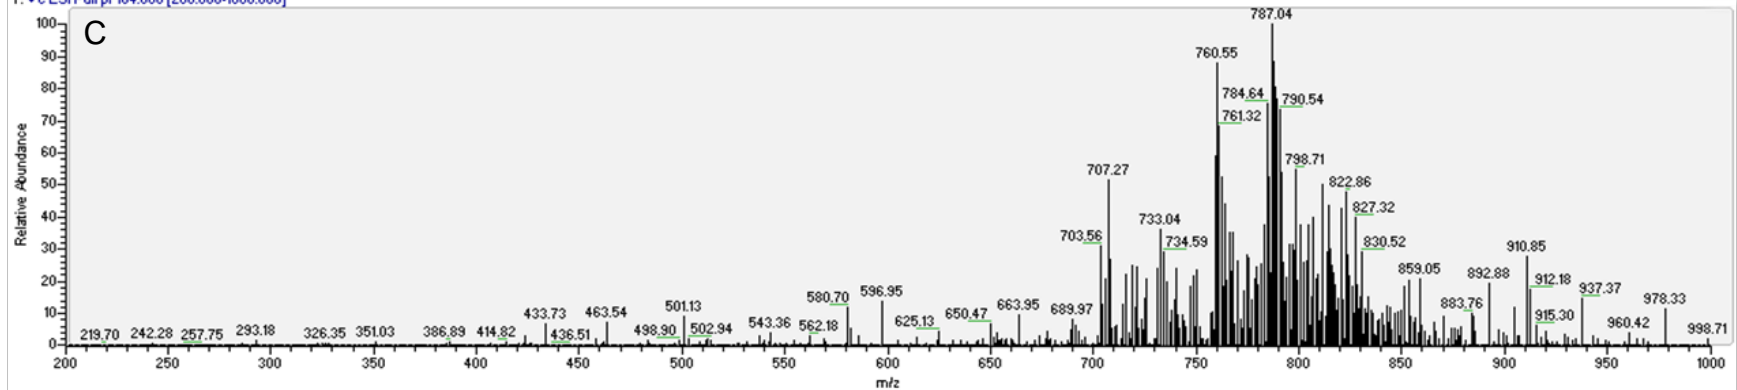

Supplemental Figure 3. Representative LC-MS/MS analysis of control porcine corneal phosphocholines. A. Profile after immediate extraction and analysis. B. Profile after storage of the eye for 24 hours at 4° C in 1X PBS before extraction. C. Profile after storage of the eye for 72 hours at 4° C in 1X PBS before extraction.

P20B\_2 control -PC\_5 good #1-112 RT: 0.01-0.99 AV: 112 NL: 4.13E4  
T: + c ESI Full pr 184.000 [200.000-1000.000]

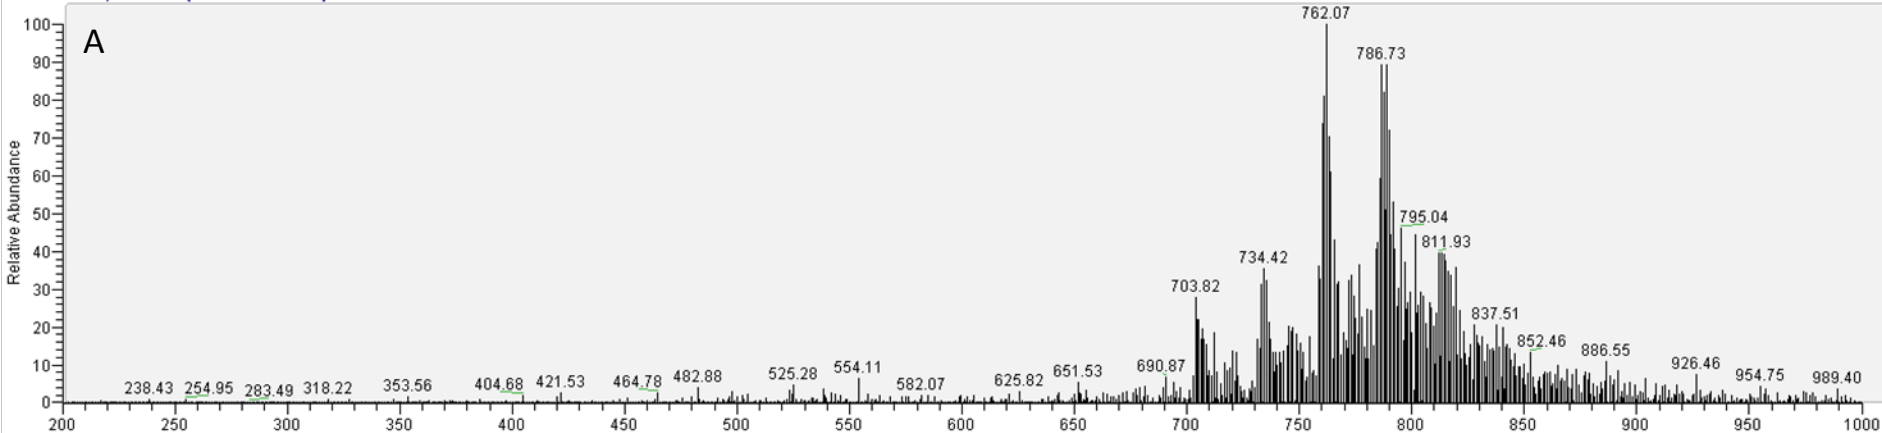

P21A control after 24 H-PC\_7 #1-113 RT: 0.00-1.00 AV: 113 NL: 3.95E3  
T: + c ESI Full pr 184.000 [200.000-1000.000]

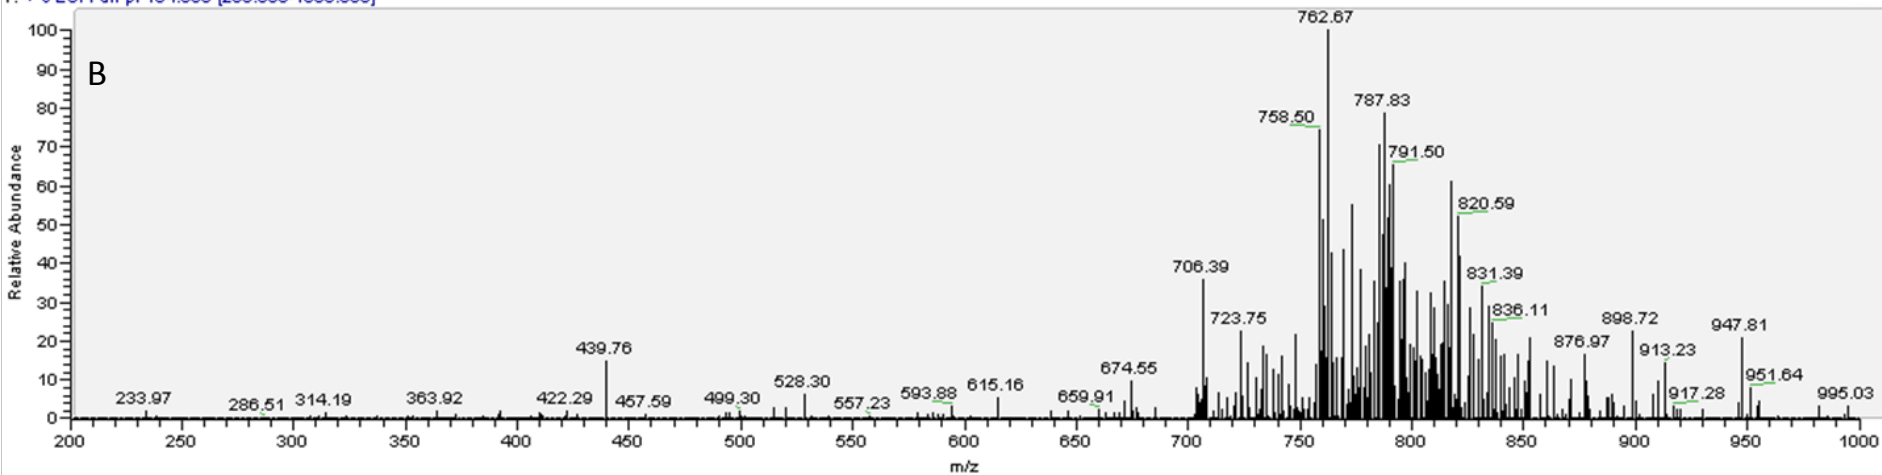

Supplemental Figure 4. Representative LC-MS/MS analysis of control porcine corneal phosphocholines after lipids were stored at  $-80^{\circ}\text{C}$ , without the addition of an external standard. A. Profile after lipids were stored for 24 hours at  $-80^{\circ}\text{C}$ . B. Profile after lipids were stored 72 hours at  $-80^{\circ}\text{C}$ .

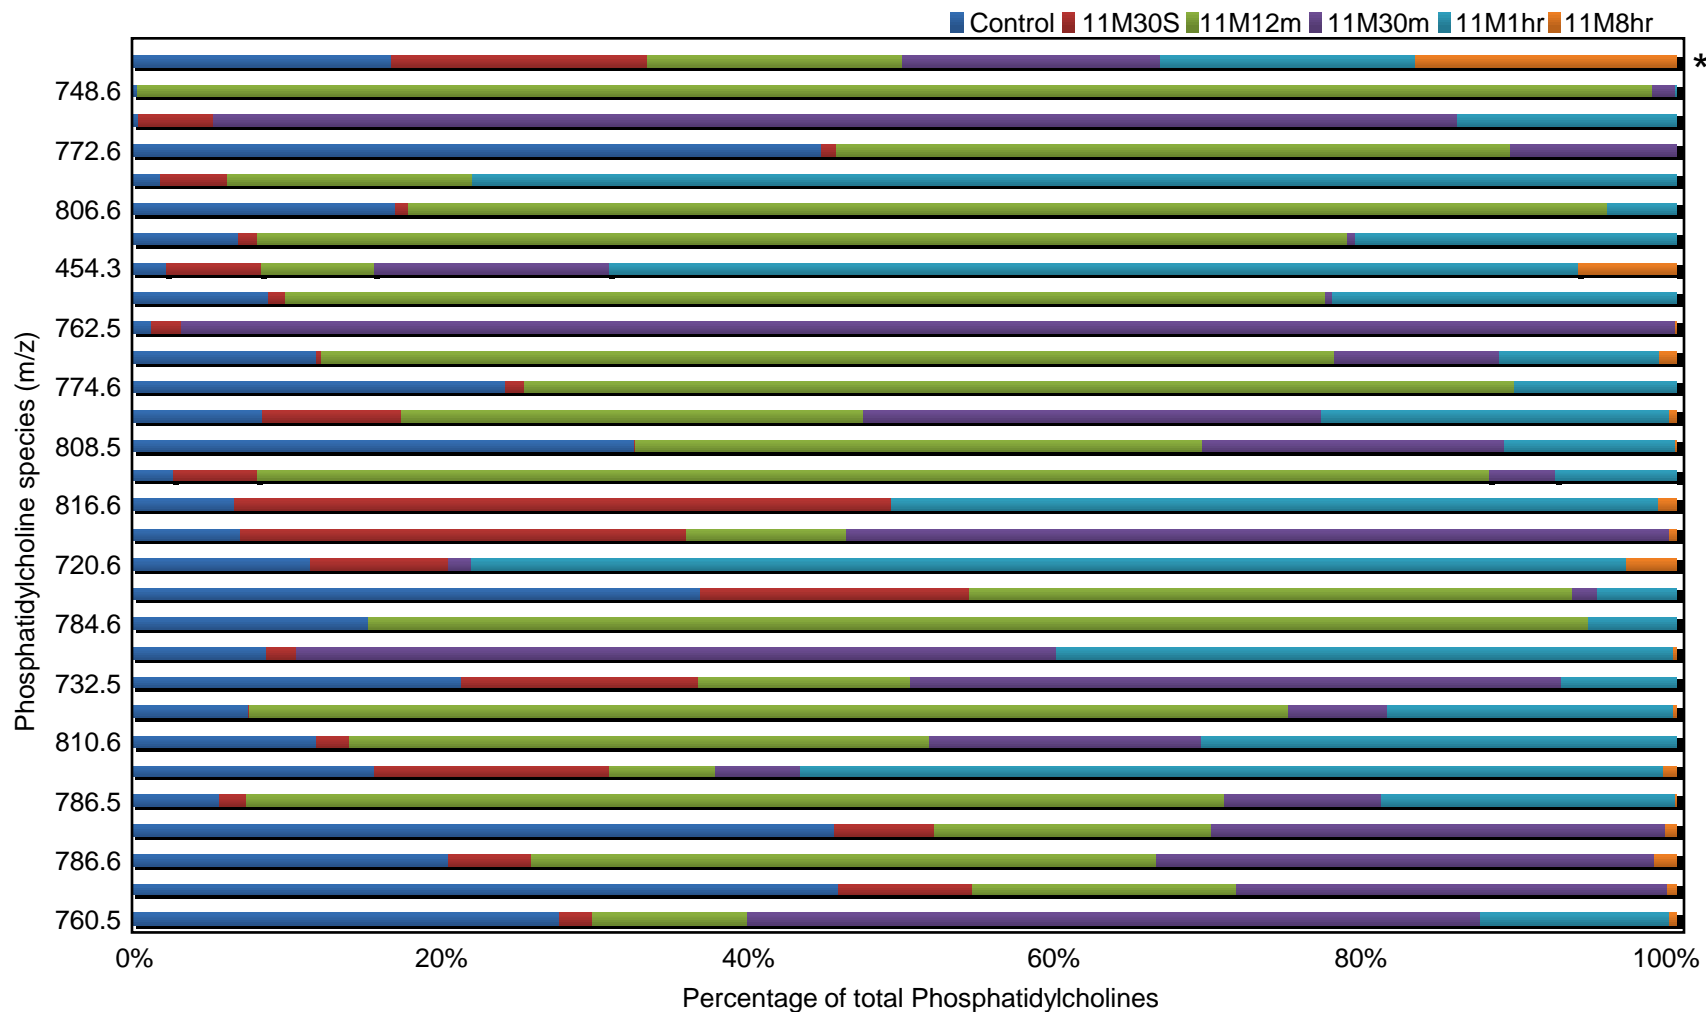

Supplemental Figure 5. Corneal phosphatidylcholine (PC) profile changes following alkali exposure. The human control, and cornea exposed to 11 M NaOH for indicated time points, were extracted using Bligh and Dyer method without subjecting them to temperature fluctuation and subsequently mass spectrometric analyses on a Agilent triple quadrupole 6410 instrument. Data were analyzed using AMDMS-SL program and a theoretically generated database as previously reported (Yang et al. 2009). Asterisk denotes the PC internal standard used at 1.6 pmol level for each analysis for ratiometric quantification of each PC species from the precursor ion scan for product ion of 184, infusion spectrum.

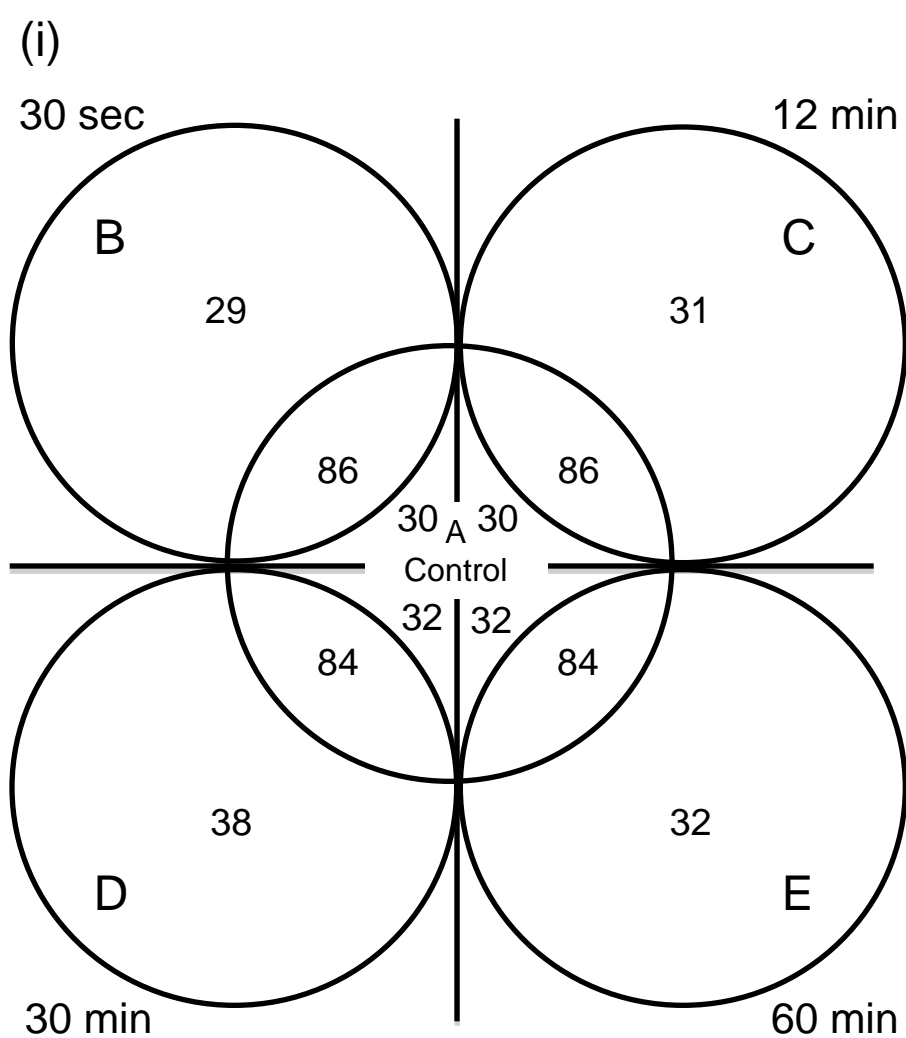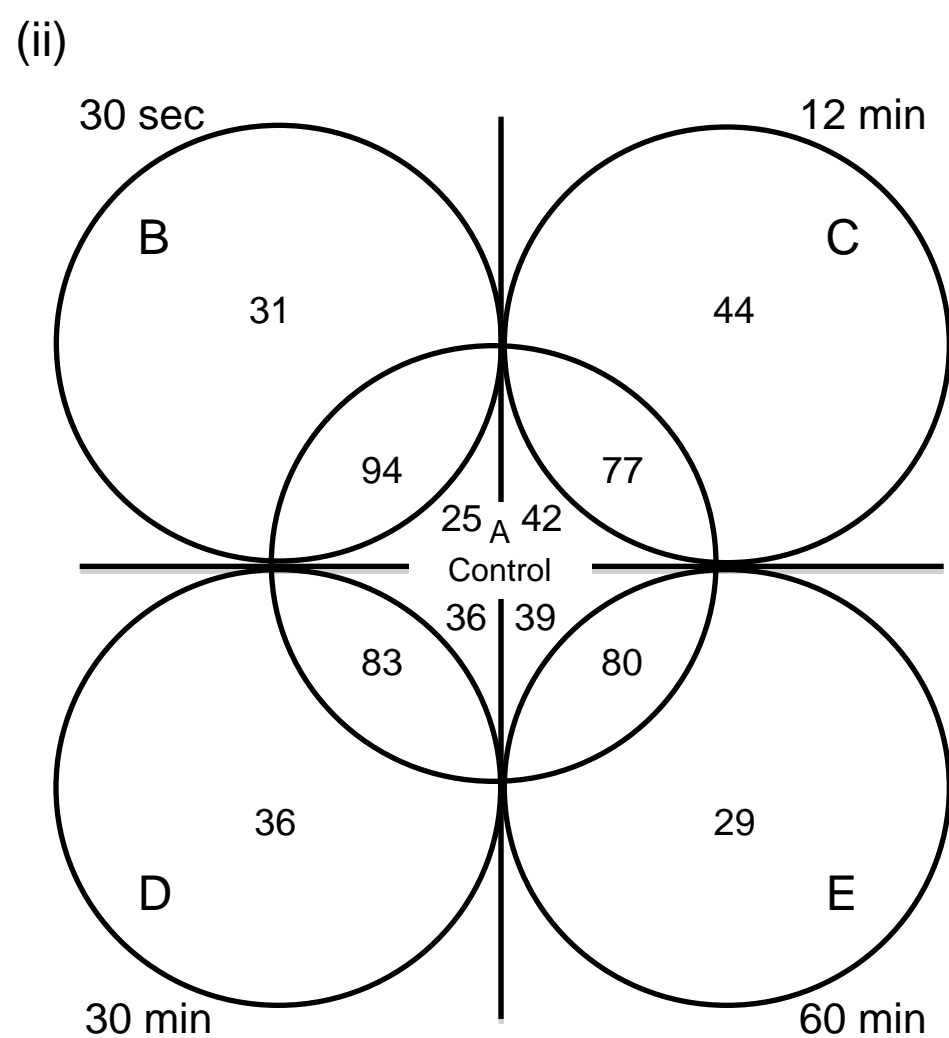

Supplemental Figure 6. Radial Venn diagram comparing control group to all experimental groups. The control group (circle A) is divided into quarters corresponding to experimental groups. The inner region of circle A is labeled with the numbers of PC species that are unique to the control group versus only each particular experimental group. Thus, these numbers do not cumulatively represent the control. Experimental groups are represented by letters B-E, corresponding to each time point labeled. The number of unique PC species of each experimental group (compared to control) is given on the outer regions circles B-E. The overlapping regions in each quadrant show the number of PC species common to the control group and the experimental. The sizes of the sections are not proportional to the number of species represented. (i) Porcine and (ii) human cornea.

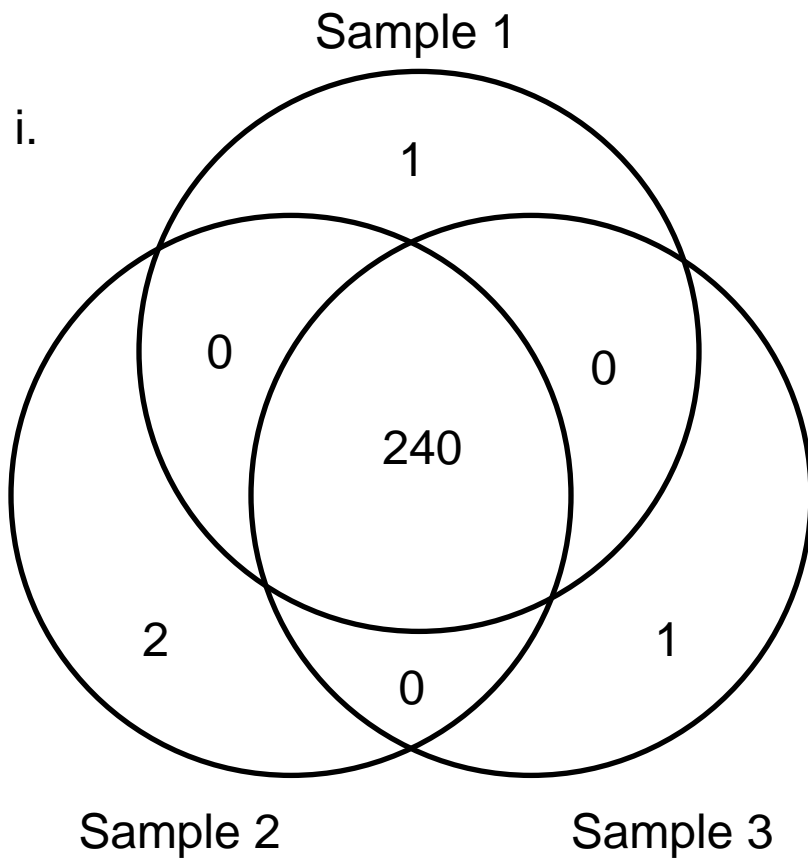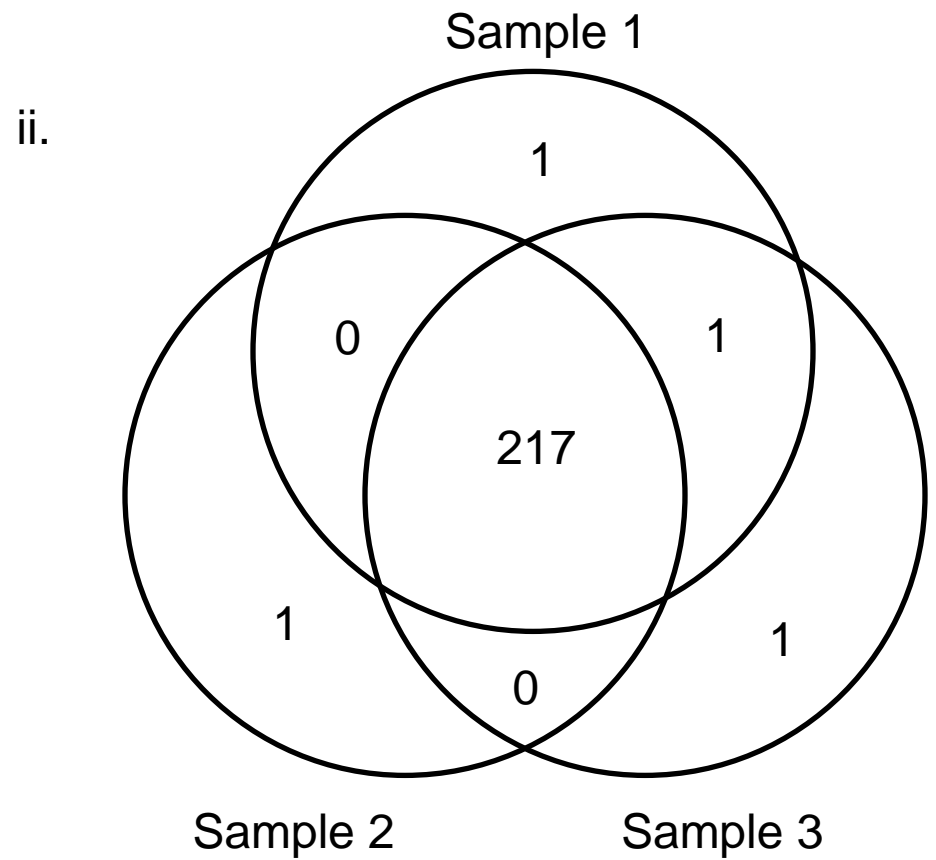

Supplemental Figure 7. Inter-corneal variation for phosphatidylcholines in control corneas. The center of each Venn diagram represents the number of common PC species among the corneal control samples. The outer regions of the diagram display the number of unique PC species in each sample. (i) Porcine (ii) Human

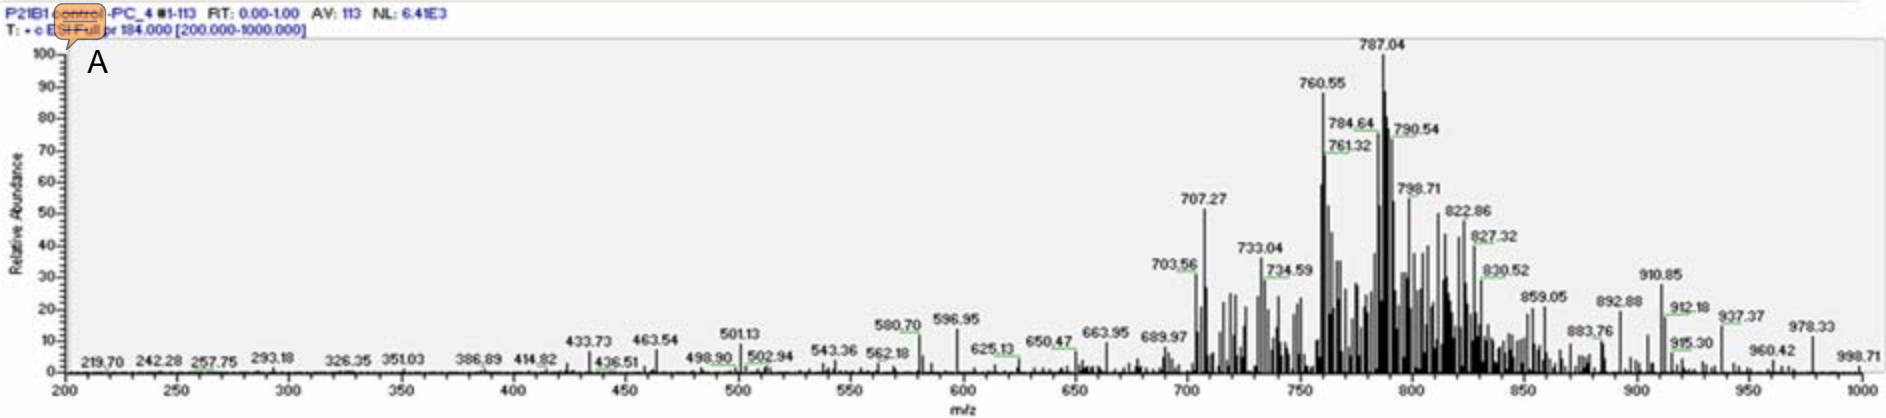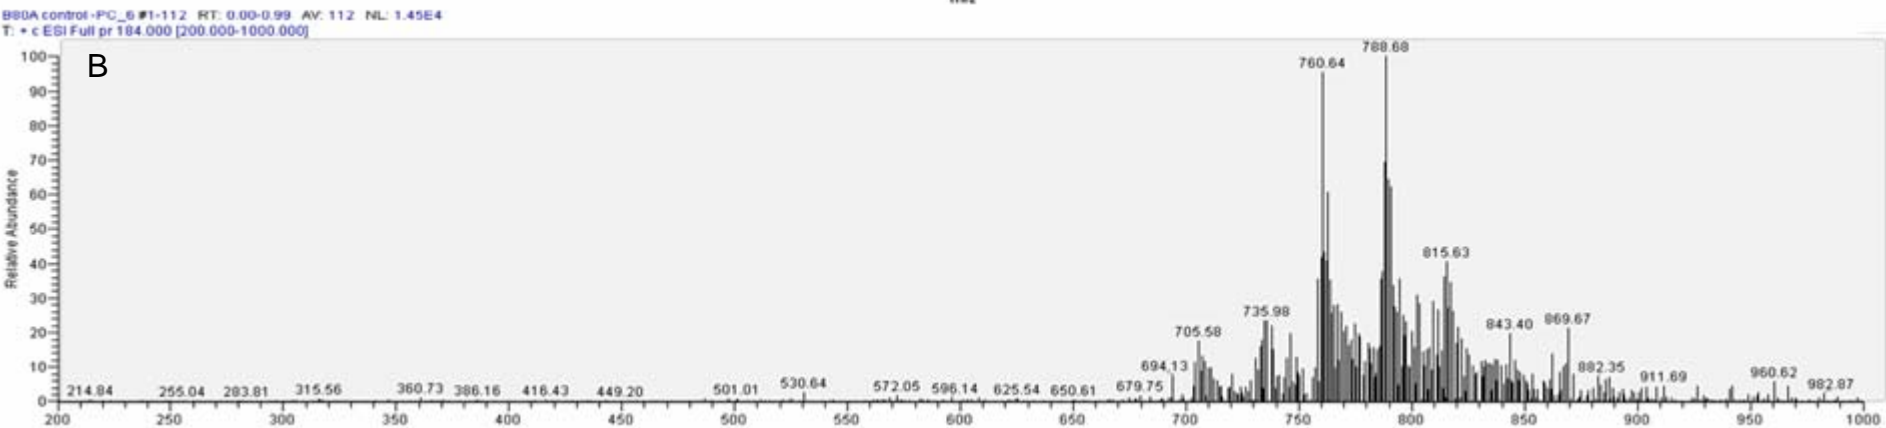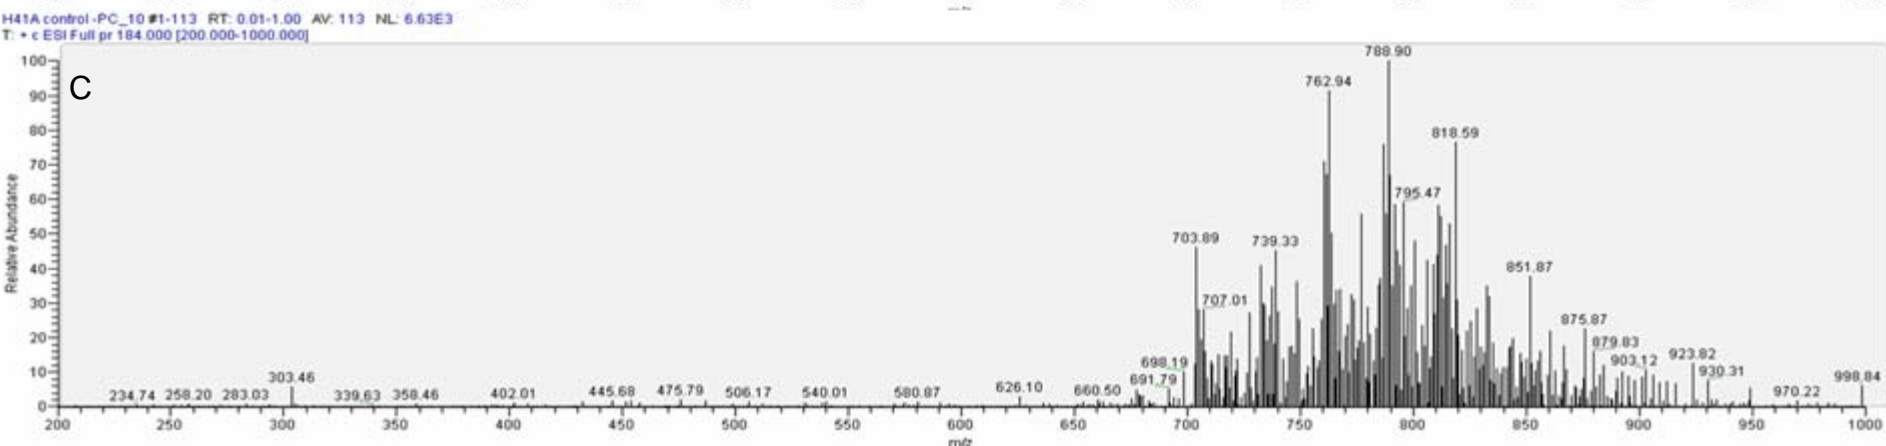

Supplemental Figure 8. Representative LC-MS/MS analysis of porcine, bovine, and human corneal phosphocholines control phosphocholines. A. Profile of porcine phosphocholines. B. Profile of bovine phosphocholines. C. Profile of human phosphocholines.



**Supplemental Table S1: Phosphocholine species present in porcine cornea.**

| Lipid Species*                       | m/z**  | Average lipid amount<br>(pmol per species/ $\mu$ g<br>protein) |
|--------------------------------------|--------|----------------------------------------------------------------|
| <b>Control corneas</b>               |        |                                                                |
| PC(13:0/13:0)                        | 650.00 | 3.77                                                           |
| PC(10:0/18:0)                        | 677.41 | 10.97                                                          |
| PC(10:0/18:1(9Z))                    | 675.28 | 2.12                                                           |
| PC(10:0/18:2(9Z,12Z))                | 674.10 | 0.63                                                           |
| PC(10:0/19:0)                        | 691.95 | 1.17                                                           |
| PC(10:0/20:0)                        | 704.71 | 12.77                                                          |
| PC(10:0/21:0)                        | 718.77 | 6.73                                                           |
| PC(10:0/22:0)                        | 733.54 | 0.96                                                           |
| PC(10:0/23:0)                        | 746.87 | 5.88                                                           |
| PC(10:0/25:0)                        | 776.17 | 12.92                                                          |
| PC(10:0/4:0)                         | 480.36 | 3.17                                                           |
| PC(11:0/11:0)                        | 592.44 | 1.59                                                           |
| PC(12:0/12:0)                        | 621.76 | 1.53                                                           |
| PC(12:0/13:0)                        | 635.08 | 1.87                                                           |
| PC(12:0/14:1(9Z))                    | 647.02 | 2.11                                                           |
| PC(12:0/15:1(9Z))                    | 660.49 | 4.11                                                           |
| PC(12:0/18:2(9Z,12Z))                | 701.82 | 21.98                                                          |
| PC(12:0/18:3(6Z,9Z,12Z))             | 698.73 | 3.08                                                           |
| PC(12:0/18:4(6Z,9Z,12Z,15Z))         | 697.39 | 4.67                                                           |
| PC(13:0/18:2(9Z,12Z))                | 716.07 | 2.54                                                           |
| PC(13:0/18:3(6Z,9Z,12Z))             | 713.07 | 2.81                                                           |
| PC(13:0/18:4(6Z,9Z,12Z,15Z))         | 710.97 | 10.05                                                          |
| PC(13:0/20:3(8Z,11Z,14Z))            | 742.22 | 11.20                                                          |
| PC(13:0/20:4(5Z,8Z,11Z,14Z))         | 738.73 | 2.83                                                           |
| PC(13:0/22:6(4Z,7Z,10Z,13Z,16Z,19Z)) | 763.29 | 79.88                                                          |
| PC(14:0/18:2(11Z,14Z))               | 728.81 | 0.52                                                           |
| PC(14:0/18:3(9Z,12Z,15Z))            | 728.00 | 0.88                                                           |
| PC(14:0/18:4(6Z,9Z,12Z,15Z))         | 725.60 | 8.43                                                           |
| PC(14:0/20:4(5Z,8Z,11Z,14Z))         | 754.03 | 0.94                                                           |
| PC(14:0/20:5(5Z,8Z,11Z,14Z,17Z))     | 751.43 | 0.77                                                           |
| PC(14:0/22:6(4Z,7Z,10Z,13Z,16Z,19Z)) | 778.31 | 5.82                                                           |
| PC(14:0/24:1(15Z))                   | 815.26 | 33.04                                                          |
| PC(15:0/18:1(11Z))                   | 745.35 | 7.92                                                           |
| PC(15:0/18:2(9Z,12Z))                | 742.63 | 6.06                                                           |
| PC(15:0/20:5(5Z,8Z,11Z,14Z,17Z))     | 765.25 | 25.70                                                          |
| PC(15:0/22:1(11Z))                   | 800.69 | 21.79                                                          |
| PC(15:0/22:2(13Z,16Z))               | 799.60 | 2.82                                                           |
| PC(15:0/22:6(4Z,7Z,10Z,13Z,16Z,19Z)) | 791.62 | 8.05                                                           |
| PC(15:1(9Z)/0:0)                     | 479.86 | 0.57                                                           |
| PC(16:0/15:1(14))                    | 716.58 | 3.43                                                           |
| PC(16:0/18:1(9Z))                    | 759.15 | 18.40                                                          |
| PC(16:0/18:2(10E,12Z))               | 756.94 | 13.80                                                          |

|                                           |        |        |
|-------------------------------------------|--------|--------|
| PC(16:0/2:0)                              | 537.88 | 0.58   |
| PC(16:0/20:3(5Z,8Z,11Z))                  | 784.50 | 33.32  |
| PC(16:0/22:5(4Z,7Z,10Z,13Z,16Z))          | 808.56 | 3.99   |
| PC(16:0/22:6(4E,7E,10E,13E,16E,19E))      | 806.48 | 17.51  |
| PC(16:0/23:5(8E,11E,14E,17E,20E))         | 820.69 | 14.97  |
| PC(16:0/24:1(15Z))                        | 843.69 | 1.10   |
| PC(16:0/26:0)                             | 872.78 | 6.25   |
| PC(16:0/26:2(5Z,9Z))                      | 869.84 | 1.00   |
| PC(16:0/3:0)                              | 550.97 | 2.00   |
| PC(16:0/3:1(2E))                          | 549.78 | 2.26   |
| PC(16:0/5:0)                              | 578.65 | 1.12   |
| PC(16:0/9:0(COOH))                        | 664.85 | 0.36   |
| PC(16:1(9E)/0:0)                          | 492.65 | 0.64   |
| PC(16:1(9Z)/2:0)                          | 535.91 | 0.16   |
| PC(17:0/10:0)                             | 662.63 | 0.41   |
| PC(17:0/18:1(9Z))                         | 774.04 | 26.73  |
| PC(17:0/22:4(7Z,10Z,13Z,16Z))             | 822.80 | 2.36   |
| PC(17:0/22:6(4Z,7Z,10Z,13Z,16Z,19Z))      | 819.93 | 4.87   |
| PC(17:1(10Z)/0:0)                         | 506.99 | 1.54   |
| PC(17:1(9Z)/22:2(13Z,16Z))                | 825.09 | 4.83   |
| PC(17:2(9Z,12Z)/0:0)                      | 505.27 | 0.72   |
| PC(18:0/11:1(10E))                        | 689.35 | 1.87   |
| PC(18:0/18:0)                             | 789.99 | 0.55   |
| PC(18:0/18:1(11Z))                        | 786.62 | 128.53 |
| PC(18:0/18:2(10Z,12Z))                    | 785.01 | 1.96   |
| PC(18:0/20:2(11Z,14Z))                    | 812.88 | 7.95   |
| PC(18:0/22:5(4Z,7Z,10Z,13Z,16Z))          | 835.67 | 6.53   |
| PC(18:0/24:1(15Z))                        | 871.11 | 5.63   |
| PC(18:1(11Z)/22:6(4Z,7Z,10Z,13Z,16Z,19Z)) | 830.63 | 10.50  |
| PC(18:1(9E)/2:0)                          | 562.68 | 4.71   |
| PC(18:1(9Z)/4:0)                          | 591.23 | 0.33   |
| PC(18:2(2E,4E)/0:0)                       | 519.38 | 1.77   |
| PC(18:2(9Z,12E)/17:2(9Z,11E))             | 766.84 | 5.29   |
| PC(18:3(9Z,12Z,15Z)/0:0)                  | 517.92 | 0.43   |
| PC(18:4(9E,11E,13E,15E)/0:0)              | 514.36 | 2.44   |
| PC(19:0/22:1(11Z))                        | 857.50 | 7.35   |
| PC(19:0/22:2(13Z,16Z))                    | 854.85 | 1.58   |
| PC(19:0/22:6(4Z,7Z,10Z,13Z,16Z,19Z))      | 846.73 | 2.73   |
| PC(19:1(9Z)/22:4(7Z,10Z,13Z,16Z))         | 850.06 | 8.81   |
| PC(19:3(10Z,13Z,16Z)/0:0)                 | 530.35 | 3.61   |
| PC(20:0/20:2(11Z,14Z))                    | 842.54 | 13.49  |
| PC(20:0/22:4(7Z,10Z,13Z,16Z))             | 866.13 | 9.70   |
| PC(20:0/22:5(7Z,10Z,13Z,16Z,19Z))         | 863.10 | 1.40   |
| PC(20:0/22:6(4Z,7Z,10Z,13Z,16Z,19Z))      | 860.67 | 0.57   |
| PC(20:0/24:1(15Z))                        | 899.40 | 0.76   |
| PC(20:1(11Z)/22:2(13Z,16Z))               | 867.46 | 1.76   |
| PC(20:3(8Z,11Z,14Z)/0:0)                  | 546.25 | 1.57   |
| PC(20:4(5Z,8Z,11Z,14Z)/0:0)               | 543.97 | 0.21   |
| PC(20:5(5Z,8Z,11Z,14Z,17Z)/0:0)           | 542.00 | 0.31   |

|                                                         |        |       |
|---------------------------------------------------------|--------|-------|
| PC(20:5(5Z,8Z,11Z,14Z,17Z)/22:6(4Z,7Z,10Z,13Z,16Z,19Z)) | 850.97 | 1.81  |
| PC(21:0/22:1(11Z))                                      | 884.96 | 0.31  |
| PC(21:0/22:2(13Z,16Z))                                  | 883.09 | 1.22  |
| PC(22:0/22:4(7Z,10Z,13Z,16Z))                           | 892.83 | 10.15 |
| PC(22:0/22:6(4Z,7Z,10Z,13Z,16Z,19Z))                    | 889.09 | 2.28  |
| PC(22:1(11Z)/22:4(7Z,10Z,13Z,16Z))                      | 892.01 | 5.57  |
| PC(22:1(13E)/22:1(13E))                                 | 897.11 | 1.35  |
| PC(22:2(13Z,16Z)/0:0)                                   | 575.12 | 0.18  |
| PC(22:4(7Z,10Z,13Z,16Z)/0:0)                            | 571.79 | 0.25  |
| PC(22:6(4Z,7Z,10Z,13Z,16Z,19Z)/0:0)                     | 566.94 | 0.22  |
| PC(23:0/18:0)                                           | 859.60 | 4.34  |
| PC(24:0/0:0)                                            | 606.47 | 17.90 |
| PC(25:0/18:0)                                           | 886.76 | 1.36  |
| PC(5:0/5:0)                                             | 426.09 | 0.13  |
| PC(6:2(3E,5E)/14:2(11E,13E))                            | 557.09 | 4.95  |
| PC(8:2(2E,4E)/8:2(2E,4E))                               | 501.75 | 0.11  |
| PC(O-10:1(9E)/2:0)                                      | 437.09 | 2.24  |
| PC(O-11:1(10E)/2:0)                                     | 450.33 | 0.61  |
| PC(O-12:0/2:0)                                          | 467.18 | 0.18  |
| PC(O-12:0/O-1:0)                                        | 439.31 | 0.10  |
| PC(O-14:0/2:0)                                          | 494.64 | 0.11  |
| PC(O-16:0/2:0)                                          | 522.44 | 1.24  |
| PC(O-16:0/3:0)                                          | 538.34 | 1.10  |
| PC(O-16:1(11Z)/2:0)                                     | 521.46 | 0.58  |
| PC(O-18:2(9Z,12Z)/2:0)                                  | 547.51 | 0.43  |
| PC(O-8:0/2:0)                                           | 411.51 | 2.17  |
|                                                         | 400.47 | 0.11  |
|                                                         | 400.80 | 0.39  |
|                                                         | 403.32 | 0.99  |
|                                                         | 404.38 | 0.28  |
|                                                         | 405.38 | 0.53  |
|                                                         | 408.24 | 0.18  |
|                                                         | 408.81 | 1.82  |
|                                                         | 413.86 | 0.06  |
|                                                         | 415.49 | 0.10  |
|                                                         | 416.86 | 3.48  |
|                                                         | 418.77 | 0.43  |
|                                                         | 419.71 | 0.87  |
|                                                         | 420.13 | 2.88  |
|                                                         | 421.11 | 2.94  |
|                                                         | 422.57 | 0.60  |
|                                                         | 426.74 | 0.33  |
|                                                         | 427.51 | 7.65  |
|                                                         | 427.61 | 2.73  |
|                                                         | 433.01 | 0.66  |
|                                                         | 433.67 | 0.95  |
|                                                         | 434.72 | 0.87  |
|                                                         | 434.88 | 0.08  |
|                                                         | 440.34 | 2.47  |

|        |      |
|--------|------|
| 440.59 | 6.80 |
| 441.42 | 6.14 |
| 443.31 | 0.89 |
| 446.75 | 6.13 |
| 449.07 | 0.21 |
| 449.67 | 0.40 |
| 455.45 | 0.20 |
| 456.36 | 0.76 |
| 456.89 | 0.16 |
| 459.32 | 3.11 |
| 459.82 | 3.50 |
| 462.24 | 0.15 |
| 463.63 | 0.27 |
| 468.78 | 0.10 |
| 469.58 | 1.58 |
| 470.15 | 0.57 |
| 472.56 | 2.17 |
| 472.67 | 0.24 |
| 473.84 | 0.32 |
| 473.85 | 0.36 |
| 478.25 | 5.39 |
| 482.88 | 0.27 |
| 485.47 | 6.84 |
| 485.72 | 0.41 |
| 486.69 | 3.93 |
| 487.92 | 0.90 |
| 489.74 | 0.76 |
| 491.35 | 1.26 |
| 496.94 | 0.16 |
| 497.97 | 5.95 |
| 498.59 | 0.75 |
| 498.75 | 2.96 |
| 503.49 | 0.23 |
| 504.20 | 1.66 |
| 512.55 | 0.79 |
| 528.21 | 0.76 |
| 529.04 | 1.28 |
| 529.66 | 0.92 |
| 532.73 | 0.36 |
| 533.34 | 1.09 |
| 533.45 | 0.14 |
| 539.00 | 0.26 |
| 540.25 | 0.71 |
| 558.66 | 1.09 |
| 561.16 | 0.82 |
| 562.16 | 0.75 |
| 568.54 | 0.75 |
| 569.15 | 0.25 |
| 569.18 | 2.13 |

|        |        |
|--------|--------|
| 572.37 | 1.19   |
| 581.87 | 0.75   |
| 582.68 | 1.23   |
| 583.25 | 0.45   |
| 584.92 | 0.66   |
| 586.88 | 1.01   |
| 588.79 | 0.10   |
| 595.91 | 1.42   |
| 596.97 | 0.67   |
| 598.04 | 0.86   |
| 598.69 | 0.20   |
| 598.69 | 1.57   |
| 602.71 | 6.43   |
| 603.30 | 0.60   |
| 604.54 | 0.72   |
| 605.21 | 3.84   |
| 610.57 | 0.06   |
| 610.94 | 0.72   |
| 612.00 | 1.05   |
| 612.62 | 0.97   |
| 612.70 | 2.88   |
| 613.92 | 1.23   |
| 615.75 | 1.22   |
| 617.65 | 3.69   |
| 619.08 | 0.85   |
| 622.87 | 0.31   |
| 622.95 | 2.20   |
| 625.37 | 0.43   |
| 628.86 | 5.98   |
| 629.45 | 1.46   |
| 633.85 | 0.08   |
| 637.75 | 0.56   |
| 638.23 | 188.29 |
| 638.81 | 2.17   |
| 641.91 | 1.52   |
| 644.19 | 0.38   |
| 651.49 | 14.29  |
| 653.21 | 2.74   |
| 654.86 | 0.69   |
| 660.04 | 0.11   |
| 667.48 | 9.00   |
| 667.69 | 6.33   |
| 668.90 | 3.29   |
| 669.93 | 9.66   |
| 671.68 | 1.66   |
| 679.35 | 1.48   |
| 683.50 | 0.07   |
| 683.94 | 6.87   |
| 684.53 | 0.32   |

|        |      |
|--------|------|
| 685.21 | 0.57 |
| 694.32 | 1.44 |
| 694.81 | 0.85 |
| 709.24 | 3.24 |
| 709.76 | 1.39 |
| 722.29 | 5.47 |

---

**30 second exposure to 11 M NaOH**

|                                      |        |        |
|--------------------------------------|--------|--------|
| PC(13:0/13:0)                        | 650.00 | 5.42   |
| PC(10:0/18:0)                        | 677.04 | 0.11   |
| PC(10:0/18:1(9Z))                    | 676.10 | 15.87  |
| PC(10:0/19:0)                        | 691.91 | 5.38   |
| PC(10:0/20:0)                        | 704.67 | 98.07  |
| PC(10:0/22:0)                        | 733.71 | 2.25   |
| PC(10:0/23:0)                        | 746.95 | 31.25  |
| PC(10:0/24:0)                        | 762.47 | 0.65   |
| PC(10:0/25:0)                        | 775.68 | 2.43   |
| PC(10:0/4:0)                         | 480.42 | 2.26   |
| PC(11:0/11:0)                        | 593.14 | 4.43   |
| PC(12:0/13:0)                        | 636.29 | 5.44   |
| PC(12:0/14:1(9Z))                    | 647.02 | 0.67   |
| PC(12:0/17:2(9Z,12Z))                | 687.92 | 2.22   |
| PC(12:0/18:1(9Z))                    | 703.90 | 25.34  |
| PC(12:0/18:2(9Z,12Z))                | 701.37 | 35.07  |
| PC(12:0/18:3(6Z,9Z,12Z))             | 699.70 | 0.72   |
| PC(12:0/20:5(5Z,8Z,11Z,14Z,17Z))     | 724.41 | 18.93  |
| PC(12:0/22:6(4Z,7Z,10Z,13Z,16Z,19Z)) | 748.90 | 6.03   |
| PC(12:0/26:0)                        | 818.30 | 34.85  |
| PC(13:0/13:0)                        | 650.97 | 43.96  |
| PC(13:0/18:3(6Z,9Z,12Z))             | 713.29 | 29.01  |
| PC(13:0/18:4(6Z,9Z,12Z,15Z))         | 711.71 | 1.87   |
| PC(13:0/20:3(8Z,11Z,14Z))            | 740.62 | 19.66  |
| PC(13:0/20:4(5Z,8Z,11Z,14Z))         | 739.76 | 2.23   |
| PC(13:0/22:2(13Z,16Z))               | 771.39 | 4.02   |
| PC(14:0/18:1(11Z))                   | 732.40 | 50.62  |
| PC(14:0/18:2(11Z,14Z))               | 729.83 | 11.28  |
| PC(14:0/18:3(9Z,12Z,15Z))            | 727.18 | 6.73   |
| PC(14:0/18:4(6Z,9Z,12Z,15Z))         | 725.93 | 1.14   |
| PC(14:0/2:0)                         | 509.45 | 2.26   |
| PC(14:0/20:4(5Z,8Z,11Z,14Z))         | 753.78 | 3.42   |
| PC(14:0/20:5(5Z,8Z,11Z,14Z,17Z))     | 751.80 | 1.61   |
| PC(14:0/22:6(4Z,7Z,10Z,13Z,16Z,19Z)) | 777.73 | 0.18   |
| PC(14:0/24:1(15Z))                   | 815.48 | 119.88 |
| PC(14:0/26:0)                        | 846.43 | 0.08   |
| PC(14:1(9Z)/0:0)                     | 465.40 | 1.67   |
| PC(15:0/18:1(11Z))                   | 745.56 | 2.16   |
| PC(15:0/20:3(8Z,11Z,14Z))            | 768.63 | 23.16  |
| PC(15:0/22:2(13Z,16Z))               | 800.21 | 29.54  |
| PC(15:0/22:6(4Z,7Z,10Z,13Z,16Z,19Z)) | 791.25 | 1.96   |
| PC(15:1(9Z)/0:0)                     | 479.85 | 1.17   |

|                                                         |        |       |
|---------------------------------------------------------|--------|-------|
| PC(15:1(9Z)/22:2(13Z,16Z))                              | 797.60 | 1.49  |
| PC(16:0/15:1(14))                                       | 717.93 | 12.40 |
| PC(16:0/18:1(9Z))                                       | 760.15 | 11.89 |
| PC(16:0/18:2(10E,12Z))                                  | 758.09 | 1.94  |
| PC(16:0/18:3(6Z,9Z,12Z))                                | 755.79 | 4.17  |
| PC(16:0/2:0)                                            | 538.29 | 2.03  |
| PC(16:0/20:3(5Z,8Z,11Z))                                | 784.55 | 0.15  |
| PC(16:0/20:5(5Z,8Z,11Z,14Z,17Z))                        | 779.50 | 3.49  |
| PC(16:0/22:5(4Z,7Z,10Z,13Z,16Z))                        | 807.95 | 0.87  |
| PC(16:0/22:6(4E,7E,10E,13E,16E,19E))                    | 805.34 | 3.18  |
| PC(16:0/24:1(15Z))                                      | 842.97 | 45.33 |
| PC(16:0/26:0)                                           | 872.97 | 1.76  |
| PC(16:0/26:2(5Z,9Z))                                    | 870.44 | 4.76  |
| PC(16:0/9:0(COOH))                                      | 665.50 | 1.30  |
| PC(16:1(9E)/0:0)                                        | 492.58 | 1.74  |
| PC(16:1(9Z)/2:0)                                        | 536.29 | 1.10  |
| PC(17:0/10:0)                                           | 663.63 | 5.25  |
| PC(17:0/18:1(9Z))                                       | 774.32 | 48.62 |
| PC(17:0/20:4(5Z,8Z,11Z,14Z))                            | 796.06 | 16.40 |
| PC(17:0/22:2(13Z,16Z))                                  | 827.66 | 14.59 |
| PC(17:0/22:4(7Z,10Z,13Z,16Z))                           | 823.69 | 0.30  |
| PC(17:1(10Z)/0:0)                                       | 507.24 | 7.03  |
| PC(17:1(9Z)/22:2(13Z,16Z))                              | 826.59 | 0.88  |
| PC(17:2(9Z,12Z)/0:0)                                    | 505.03 | 0.16  |
| PC(18:0/11:1(10E))                                      | 689.27 | 3.90  |
| PC(18:0/18:0)                                           | 789.42 | 60.23 |
| PC(18:0/18:1(11Z))                                      | 787.24 | 7.43  |
| PC(18:0/18:2(10Z,12Z))                                  | 785.30 | 15.11 |
| PC(18:0/20:2(11Z,14Z))                                  | 813.42 | 11.64 |
| PC(18:0/22:4(7Z,10Z,13Z,16Z))                           | 837.33 | 3.74  |
| PC(18:0/24:1(15Z))                                      | 871.90 | 7.18  |
| PC(18:1(11Z)/22:6(4Z,7Z,10Z,13Z,16Z,19Z))               | 831.97 | 8.41  |
| PC(18:1(9E)/2:0)                                        | 562.99 | 12.53 |
| PC(18:2(2E,4E)/0:0)                                     | 518.95 | 1.64  |
| PC(18:2(9Z,12E)/17:2(9Z,11E))                           | 768.14 | 0.09  |
| PC(18:2(9Z,12Z)/22:6(4Z,7Z,10Z,13Z,16Z,19Z))            | 829.73 | 40.83 |
| PC(18:4(9E,11E,13E,15E)/0:0)                            | 515.86 | 0.75  |
| PC(19:0/22:1(11Z))                                      | 857.83 | 9.17  |
| PC(19:1(9Z)/22:4(7Z,10Z,13Z,16Z))                       | 849.98 | 10.99 |
| PC(20:0/20:2(11Z,14Z))                                  | 841.66 | 1.83  |
| PC(20:0/22:5(7Z,10Z,13Z,16Z,19Z))                       | 863.36 | 0.60  |
| PC(20:0/22:6(4Z,7Z,10Z,13Z,16Z,19Z))                    | 861.91 | 8.82  |
| PC(20:1(11Z)/22:2(13Z,16Z))                             | 867.59 | 3.65  |
| PC(20:3(8Z,11Z,14Z)/0:0)                                | 544.76 | 1.24  |
| PC(20:4(5Z,8Z,11Z,14Z)/0:0)                             | 543.82 | 0.52  |
| PC(20:5(5Z,8Z,11Z,14Z,17Z)/0:0)                         | 541.69 | 0.32  |
| PC(20:5(5Z,8Z,11Z,14Z,17Z)/22:5(7Z,10Z,13Z,16Z,19Z))    | 852.94 | 22.62 |
| PC(20:5(5Z,8Z,11Z,14Z,17Z)/22:6(4Z,7Z,10Z,13Z,16Z,19Z)) | 851.45 | 2.88  |
| PC(21:0/22:1(11Z))                                      | 885.12 | 5.95  |

|                                                             |        |       |
|-------------------------------------------------------------|--------|-------|
| PC(21:0/22:2(13Z,16Z))                                      | 884.40 | 6.58  |
| PC(21:0/22:4(7Z,10Z,13Z,16Z))                               | 880.56 | 0.21  |
| PC(21:0/22:6(4Z,7Z,10Z,13Z,16Z,19Z))                        | 875.77 | 13.56 |
| PC(22:0/22:4(7Z,10Z,13Z,16Z))                               | 893.96 | 9.41  |
| PC(22:0/22:6(4Z,7Z,10Z,13Z,16Z,19Z))                        | 889.23 | 1.47  |
| PC(22:1(11Z)/22:4(7Z,10Z,13Z,16Z))                          | 891.31 | 4.00  |
| PC(22:1(13E)/22:1(13E))                                     | 898.15 | 0.35  |
| PC(22:2(13Z,16Z)/0:0)                                       | 575.22 | 0.34  |
| PC(22:6(4Z,7Z,10Z,13Z,16Z,19Z)/0:0)                         | 567.63 | 0.73  |
| PC(22:6(4Z,7Z,10Z,13Z,16Z,19Z)/22:6(4Z,7Z,10Z,13Z,16Z,19Z)) | 877.83 | 0.81  |
| PC(23:0/18:0)                                               | 859.56 | 0.13  |
| PC(24:0/0:0)                                                | 608.14 | 21.63 |
| PC(25:0/18:0)                                               | 887.03 | 18.15 |
| PC(6:0/6:0)                                                 | 453.50 | 0.15  |
| PC(6:2(2E,4E)/6:2(2E,4E))                                   | 445.34 | 1.85  |
| PC(6:2(3E,5E)/14:2(11E,13E))                                | 556.86 | 0.65  |
| PC(8:2(2E,4E)/8:2(2E,4E))                                   | 501.45 | 0.26  |
| PC(O-10:1(9E)/2:0)                                          | 436.99 | 4.10  |
| PC(O-11:1(10E)/2:0)                                         | 451.27 | 0.06  |
| PC(O-12:0/O-1:0)                                            | 438.71 | 0.08  |
| PC(O-14:0/2:0)                                              | 495.47 | 1.16  |
| PC(O-14:0/O-1:0)                                            | 468.33 | 0.12  |
| PC(O-16:0/2:0)                                              | 522.49 | 0.16  |
| PC(O-16:1(11Z)/2:0)                                         | 521.22 | 5.08  |
|                                                             | 400.84 | 3.13  |
|                                                             | 407.92 | 1.34  |
|                                                             | 407.95 | 1.28  |
|                                                             | 408.64 | 0.29  |
|                                                             | 409.61 | 0.57  |
|                                                             | 413.47 | 3.47  |
|                                                             | 415.46 | 0.13  |
|                                                             | 419.04 | 1.88  |
|                                                             | 419.16 | 0.28  |
|                                                             | 419.49 | 0.69  |
|                                                             | 422.11 | 0.54  |
|                                                             | 422.22 | 0.39  |
|                                                             | 427.37 | 0.57  |
|                                                             | 427.54 | 0.43  |
|                                                             | 429.37 | 2.37  |
|                                                             | 431.57 | 2.80  |
|                                                             | 434.49 | 0.13  |
|                                                             | 435.95 | 0.06  |
|                                                             | 440.42 | 0.20  |
|                                                             | 440.74 | 1.05  |
|                                                             | 447.52 | 0.13  |
|                                                             | 447.66 | 0.67  |
|                                                             | 448.79 | 0.70  |
|                                                             | 449.72 | 1.19  |
|                                                             | 454.77 | 0.53  |



|        |      |
|--------|------|
| 455.19 | 0.76 |
| 458.61 | 0.44 |
| 469.93 | 0.38 |
| 470.46 | 0.47 |
| 470.86 | 2.89 |
| 471.59 | 2.25 |
| 471.60 | 1.20 |
| 474.10 | 0.68 |
| 475.28 | 0.22 |
| 476.42 | 0.56 |
| 478.10 | 1.18 |
| 483.89 | 0.05 |
| 484.63 | 1.83 |
| 490.44 | 0.64 |
| 492.29 | 1.17 |
| 497.11 | 1.91 |
| 498.07 | 4.65 |
| 503.41 | 1.93 |
| 513.57 | 0.85 |
| 524.57 | 0.26 |
| 525.98 | 0.47 |
| 528.26 | 0.16 |
| 532.80 | 0.12 |
| 533.27 | 1.38 |
| 539.61 | 2.25 |
| 554.17 | 0.06 |
| 555.37 | 0.43 |
| 556.04 | 2.62 |
| 561.60 | 0.06 |
| 568.37 | 7.57 |
| 568.47 | 0.62 |
| 574.32 | 0.26 |
| 581.06 | 2.85 |
| 581.08 | 3.69 |
| 584.63 | 6.77 |
| 587.15 | 0.85 |
| 587.28 | 0.20 |
| 588.55 | 1.06 |
| 594.69 | 0.02 |
| 599.34 | 2.28 |
| 600.22 | 0.87 |
| 603.54 | 1.26 |
| 605.80 | 1.80 |
| 610.78 | 0.82 |
| 614.79 | 2.33 |
| 617.07 | 0.06 |
| 618.83 | 5.84 |
| 625.11 | 4.35 |
| 625.80 | 0.70 |

|        |       |
|--------|-------|
| 629.73 | 1.98  |
| 631.27 | 0.22  |
| 631.51 | 4.13  |
| 634.39 | 0.13  |
| 637.17 | 0.71  |
| 638.61 | 0.26  |
| 641.11 | 0.24  |
| 643.04 | 0.29  |
| 643.92 | 0.24  |
| 644.67 | 0.13  |
| 651.96 | 13.67 |
| 653.97 | 1.80  |
| 657.47 | 41.86 |
| 658.07 | 1.14  |
| 658.55 | 1.13  |
| 669.82 | 1.11  |
| 670.60 | 9.16  |
| 671.89 | 0.04  |
| 672.35 | 11.31 |
| 682.73 | 11.60 |
| 683.22 | 8.78  |
| 684.65 | 1.03  |
| 685.19 | 0.10  |
| 693.25 | 14.65 |
| 709.97 | 5.53  |

---

**12 min exposure to 11 M NaOH**

|                                      |        |       |
|--------------------------------------|--------|-------|
| PC(10:0/10:0)                        | 565.56 | 1.76  |
| PC(13:0/13:0)                        | 650.00 | 7.49  |
| PC(10:0/18:0)                        | 677.16 | 4.05  |
| PC(10:0/19:0)                        | 692.10 | 44.57 |
| PC(10:0/21:0)                        | 720.08 | 10.51 |
| PC(10:0/22:0)                        | 733.02 | 6.16  |
| PC(10:0/24:0)                        | 760.90 | 1.85  |
| PC(10:0/25:0)                        | 776.14 | 1.10  |
| PC(10:0/4:0)                         | 480.47 | 0.61  |
| PC(12:0/12:0)                        | 621.64 | 1.11  |
| PC(12:0/13:0)                        | 635.38 | 0.09  |
| PC(12:0/14:1(9Z))                    | 646.81 | 4.81  |
| PC(12:0/15:1(9Z))                    | 661.45 | 10.01 |
| PC(12:0/18:1(9Z))                    | 702.89 | 6.03  |
| PC(12:0/18:2(9Z,12Z))                | 701.39 | 5.16  |
| PC(12:0/18:3(6Z,9Z,12Z))             | 699.78 | 5.68  |
| PC(12:0/18:4(6Z,9Z,12Z,15Z))         | 698.38 | 0.51  |
| PC(12:0/26:0)                        | 818.19 | 28.58 |
| PC(13:0/13:0)                        | 651.48 | 7.49  |
| PC(13:0/18:2(9Z,12Z))                | 714.71 | 20.86 |
| PC(13:0/18:4(6Z,9Z,12Z,15Z))         | 712.00 | 28.69 |
| PC(13:0/20:4(5Z,8Z,11Z,14Z))         | 739.27 | 4.06  |
| PC(13:0/22:6(4Z,7Z,10Z,13Z,16Z,19Z)) | 763.00 | 1.28  |

|                                      |        |       |
|--------------------------------------|--------|-------|
| PC(14:0/18:2(11Z,14Z))               | 730.53 | 4.10  |
| PC(14:0/18:3(9Z,12Z,15Z))            | 727.33 | 2.95  |
| PC(14:0/18:4(6Z,9Z,12Z,15Z))         | 725.48 | 15.48 |
| PC(14:0/2:0)                         | 509.45 | 1.69  |
| PC(14:0/20:4(5Z,8Z,11Z,14Z))         | 753.40 | 7.04  |
| PC(14:0/20:5(5Z,8Z,11Z,14Z,17Z))     | 750.89 | 7.14  |
| PC(14:0/22:6(4Z,7Z,10Z,13Z,16Z,19Z)) | 777.75 | 1.35  |
| PC(14:0/24:1(15Z))                   | 816.26 | 28.84 |
| PC(14:0/26:0)                        | 845.97 | 9.75  |
| PC(14:1(9Z)/0:0)                     | 465.12 | 6.71  |
| PC(15:0/18:1(11Z))                   | 745.13 | 10.95 |
| PC(15:0/18:2(9Z,12Z))                | 743.18 | 16.00 |
| PC(15:0/20:3(8Z,11Z,14Z))            | 768.82 | 17.65 |
| PC(15:0/20:5(5Z,8Z,11Z,14Z,17Z))     | 764.74 | 4.82  |
| PC(15:0/22:1(11Z))                   | 801.53 | 2.74  |
| PC(15:0/22:2(13Z,16Z))               | 799.98 | 25.22 |
| PC(15:0/22:6(4Z,7Z,10Z,13Z,16Z,19Z)) | 791.47 | 62.40 |
| PC(15:1(9Z)/22:4(7Z,10Z,13Z,16Z))    | 793.02 | 0.63  |
| PC(16:0/15:1(14))                    | 717.60 | 3.70  |
| PC(16:0/18:1(9Z))                    | 759.05 | 2.50  |
| PC(16:0/18:3(6Z,9Z,12Z))             | 754.80 | 24.28 |
| PC(16:0/2:0)                         | 536.54 | 0.17  |
| PC(16:0/20:4(5Z,8Z,11Z,14Z))         | 781.68 | 2.38  |
| PC(16:0/22:5(4Z,7Z,10Z,13Z,16Z))     | 807.68 | 20.63 |
| PC(16:0/22:6(4E,7E,10E,13E,16E,19E)) | 805.53 | 12.71 |
| PC(16:0/26:0)                        | 873.05 | 0.40  |
| PC(16:0/3:0)                         | 551.77 | 1.37  |
| PC(16:0/3:1(2E))                     | 549.49 | 0.89  |
| PC(16:0/5:0(COOH))                   | 610.03 | 0.12  |
| PC(16:0/5:0)                         | 579.08 | 2.12  |
| PC(16:0/9:0(COOH))                   | 665.02 | 2.50  |
| PC(16:1(9E)/0:0)                     | 493.12 | 0.74  |
| PC(16:1(9Z)/2:0)                     | 535.67 | 0.71  |
| PC(17:0/10:0)                        | 663.29 | 9.93  |
| PC(17:0/18:1(9Z))                    | 773.73 | 32.67 |
| PC(17:0/20:4(5Z,8Z,11Z,14Z))         | 795.53 | 1.95  |
| PC(17:0/22:4(7Z,10Z,13Z,16Z))        | 824.33 | 2.49  |
| PC(17:1(10Z)/0:0)                    | 506.68 | 0.23  |
| PC(17:1(9Z)/22:2(13Z,16Z))           | 825.48 | 13.48 |
| PC(17:2(9Z,12Z)/0:0)                 | 504.58 | 14.38 |
| PC(18:0/11:1(10E))                   | 689.79 | 10.35 |
| PC(18:0/18:0)                        | 789.53 | 10.79 |
| PC(18:0/18:1(11Z))                   | 787.35 | 0.87  |
| PC(18:0/18:2(10Z,12Z))               | 785.39 | 7.19  |
| PC(18:0/20:2(11Z,14Z))               | 813.52 | 35.33 |
| PC(18:0/20:3(5Z,11Z,14Z))            | 811.32 | 4.56  |
| PC(18:0/22:3(10Z,13Z,16Z))           | 839.02 | 0.46  |
| PC(18:0/22:4(7Z,10Z,13Z,16Z))        | 837.31 | 22.90 |
| PC(18:0/22:5(4Z,7Z,10Z,13Z,16Z))     | 836.56 | 1.15  |

|                                                             |        |        |
|-------------------------------------------------------------|--------|--------|
| PC(18:0/24:1(15Z))                                          | 872.44 | 5.86   |
| PC(18:1(9E)/2:0)                                            | 563.62 | 1.60   |
| PC(18:1(9Z)/4:0)                                            | 590.99 | 0.43   |
| PC(18:2(2E,4E)/0:0)                                         | 518.93 | 0.17   |
| PC(18:2(9Z,12E)/17:2(9Z,11E))                               | 768.08 | 1.39   |
| PC(18:2(9Z,12Z)/22:6(4Z,7Z,10Z,13Z,16Z,19Z))                | 829.90 | 11.10  |
| PC(18:3(9Z,12Z,15Z)/0:0)                                    | 516.94 | 2.02   |
| PC(18:4(9E,11E,13E,15E)/0:0)                                | 515.97 | 0.08   |
| PC(19:0/22:1(11Z))                                          | 856.76 | 2.02   |
| PC(19:0/22:2(13Z,16Z))                                      | 856.33 | 10.89  |
| PC(19:0/22:6(4Z,7Z,10Z,13Z,16Z,19Z))                        | 847.55 | 0.91   |
| PC(19:1(9Z)/22:4(7Z,10Z,13Z,16Z))                           | 849.60 | 0.35   |
| PC(20:0/20:2(11Z,14Z))                                      | 841.36 | 3.98   |
| PC(20:0/22:4(7Z,10Z,13Z,16Z))                               | 866.52 | 20.55  |
| PC(20:0/22:5(7Z,10Z,13Z,16Z,19Z))                           | 862.98 | 9.62   |
| PC(20:0/22:6(4Z,7Z,10Z,13Z,16Z,19Z))                        | 860.62 | 1.49   |
| PC(20:1(11Z)/22:2(13Z,16Z))                                 | 867.52 | 1.97   |
| PC(20:4(5Z,8Z,11Z,14Z)/0:0)                                 | 543.68 | 0.30   |
| PC(20:5(5Z,8Z,11Z,14Z,17Z)/22:5(7Z,10Z,13Z,16Z,19Z))        | 854.27 | 18.61  |
| PC(21:0/22:1(11Z))                                          | 885.80 | 7.08   |
| PC(21:0/22:2(13Z,16Z))                                      | 883.68 | 5.29   |
| PC(21:0/22:4(7Z,10Z,13Z,16Z))                               | 880.48 | 0.33   |
| PC(21:0/22:6(4Z,7Z,10Z,13Z,16Z,19Z))                        | 876.03 | 0.99   |
| PC(22:0/22:4(7Z,10Z,13Z,16Z))                               | 894.02 | 5.12   |
| PC(22:0/22:6(4Z,7Z,10Z,13Z,16Z,19Z))                        | 889.78 | 0.38   |
| PC(22:1(11Z)/22:2(13Z,16Z))                                 | 896.12 | 0.78   |
| PC(22:1(13E)/22:1(13E))                                     | 898.25 | 23.89  |
| PC(22:4(7Z,10Z,13Z,16Z)/0:0)                                | 571.29 | 6.34   |
| PC(22:4(7Z,10Z,13Z,16Z)/22:6(4Z,7Z,10Z,13Z,16Z,19Z))        | 880.70 | 0.57   |
| PC(22:6(4Z,7Z,10Z,13Z,16Z,19Z)/0:0)                         | 568.25 | 0.11   |
| PC(22:6(4Z,7Z,10Z,13Z,16Z,19Z)/22:6(4Z,7Z,10Z,13Z,16Z,19Z)) | 878.47 | 45.26  |
| PC(23:0/18:0)                                               | 859.97 | 1.99   |
| PC(5:0/5:0)                                                 | 425.96 | 0.44   |
| PC(6:2(2E,4E)/6:2(2E,4E))                                   | 445.50 | 1.38   |
| PC(6:2(3E,5E)/14:2(11E,13E))                                | 556.80 | 2.80   |
| PC(8:2(2E,4E)/8:2(2E,4E))                                   | 500.44 | 3.17   |
| PC(O-10:1(9E)/2:0)                                          | 437.97 | 0.69   |
| PC(O-11:1(10E)/2:0)                                         | 451.35 | 0.29   |
| PC(O-12:0/2:0)                                              | 467.50 | 1.11   |
| PC(O-12:0/O-1:0)                                            | 439.47 | 2.32   |
| PC(O-14:0/2:0)                                              | 494.75 | 0.60   |
| PC(O-14:0/O-14:0)                                           | 650.53 | 140.29 |
| PC(O-16:0/2:0)                                              | 523.37 | 2.76   |
| PC(O-16:1(11Z)/2:0)                                         | 520.65 | 6.05   |
|                                                             | 400.84 | 2.53   |
|                                                             | 402.58 | 0.07   |
|                                                             | 403.05 | 0.04   |
|                                                             | 403.14 | 24.16  |
|                                                             | 404.38 | 0.12   |

|        |       |
|--------|-------|
| 406.63 | 0.15  |
| 406.93 | 20.83 |
| 412.26 | 1.03  |
| 414.10 | 1.80  |
| 414.47 | 10.07 |
| 418.73 | 0.17  |
| 419.31 | 1.59  |
| 420.82 | 0.03  |
| 420.83 | 1.21  |
| 421.29 | 5.01  |
| 422.08 | 0.19  |
| 426.78 | 0.48  |
| 428.44 | 3.01  |
| 428.65 | 1.16  |
| 431.30 | 6.33  |
| 431.96 | 86.97 |
| 432.71 | 0.03  |
| 434.97 | 0.19  |
| 435.80 | 0.39  |
| 436.01 | 2.62  |
| 442.36 | 1.04  |
| 448.20 | 4.86  |
| 454.36 | 0.08  |
| 457.23 | 4.56  |
| 458.03 | 6.50  |
| 458.64 | 0.13  |
| 470.78 | 2.81  |
| 470.92 | 1.80  |
| 473.59 | 10.69 |
| 474.29 | 0.55  |
| 477.46 | 2.15  |
| 478.06 | 0.17  |
| 482.46 | 0.49  |
| 484.44 | 1.94  |
| 485.06 | 0.13  |
| 486.55 | 8.86  |
| 488.73 | 0.42  |
| 496.86 | 0.24  |
| 497.50 | 1.83  |
| 499.00 | 0.58  |
| 499.28 | 1.21  |
| 503.03 | 0.15  |
| 503.12 | 5.42  |
| 512.16 | 7.71  |
| 525.10 | 0.08  |
| 529.39 | 0.45  |
| 530.07 | 5.65  |
| 533.28 | 3.49  |
| 538.55 | 0.42  |

|        |       |
|--------|-------|
| 538.63 | 0.63  |
| 539.14 | 56.36 |
| 553.41 | 2.83  |
| 553.68 | 1.15  |
| 555.63 | 2.97  |
| 559.23 | 0.44  |
| 559.82 | 4.24  |
| 569.93 | 0.36  |
| 572.67 | 11.08 |
| 582.62 | 2.77  |
| 582.86 | 1.28  |
| 585.75 | 5.28  |
| 587.00 | 0.16  |
| 588.91 | 1.35  |
| 589.64 | 24.25 |
| 596.43 | 0.11  |
| 596.46 | 5.72  |
| 597.62 | 1.65  |
| 597.94 | 0.34  |
| 601.70 | 10.06 |
| 603.13 | 0.23  |
| 604.84 | 11.26 |
| 605.77 | 0.90  |
| 612.67 | 3.86  |
| 613.93 | 3.48  |
| 614.71 | 2.33  |
| 615.77 | 0.17  |
| 616.75 | 5.41  |
| 622.80 | 0.91  |
| 624.22 | 2.21  |
| 625.89 | 0.45  |
| 625.97 | 1.94  |
| 626.58 | 0.35  |
| 627.26 | 4.11  |
| 630.61 | 0.30  |
| 630.63 | 0.08  |
| 632.64 | 5.16  |
| 633.68 | 1.48  |
| 637.60 | 2.20  |
| 639.67 | 0.54  |
| 642.63 | 0.18  |
| 644.98 | 3.02  |
| 651.77 | 89.81 |
| 652.07 | 42.59 |
| 652.27 | 9.71  |
| 653.21 | 79.13 |
| 655.84 | 73.95 |
| 666.57 | 9.49  |
| 668.04 | 7.81  |

|        |       |
|--------|-------|
| 671.02 | 4.68  |
| 679.79 | 0.13  |
| 680.68 | 11.52 |
| 680.85 | 0.49  |
| 682.18 | 1.16  |
| 683.78 | 3.74  |
| 684.01 | 27.62 |
| 692.89 | 0.18  |
| 695.26 | 2.65  |
| 696.05 | 7.21  |
| 708.12 | 32.45 |
| 708.79 | 14.04 |
| 709.65 | 8.84  |
| 709.87 | 9.04  |
| 736.25 | 39.44 |

---

**30 min exposure to 11 M NaOH**

|                                      |        |        |
|--------------------------------------|--------|--------|
| PC(10:0/10:0)                        | 565.47 | 0.57   |
| PC(13:0/13:0)                        | 650.00 | 12.34  |
| PC(10:0/18:0)                        | 676.92 | 9.27   |
| PC(10:0/18:1(9Z))                    | 675.97 | 10.57  |
| PC(10:0/18:2(9Z,12Z))                | 673.91 | 10.59  |
| PC(10:0/20:0)                        | 706.44 | 23.14  |
| PC(10:0/21:0)                        | 719.20 | 4.23   |
| PC(10:0/22:0)                        | 733.27 | 1.78   |
| PC(10:0/23:0)                        | 746.70 | 16.87  |
| PC(10:0/24:0)                        | 761.47 | 17.67  |
| PC(10:0/4:0)                         | 480.45 | 3.53   |
| PC(11:0/11:0)                        | 593.06 | 9.40   |
| PC(12:0/12:0)                        | 621.18 | 9.55   |
| PC(12:0/13:0)                        | 635.05 | 10.29  |
| PC(12:0/14:1(9Z))                    | 646.98 | 1.33   |
| PC(12:0/15:1(9Z))                    | 660.82 | 6.80   |
| PC(12:0/17:2(9Z,12Z))                | 687.07 | 47.19  |
| PC(12:0/18:1(9Z))                    | 703.60 | 87.11  |
| PC(12:0/18:2(9Z,12Z))                | 701.49 | 12.50  |
| PC(12:0/18:3(6Z,9Z,12Z))             | 698.51 | 5.97   |
| PC(12:0/18:4(6Z,9Z,12Z,15Z))         | 697.44 | 0.80   |
| PC(12:0/26:0)                        | 817.78 | 119.10 |
| PC(13:0/18:2(9Z,12Z))                | 715.44 | 8.74   |
| PC(13:0/18:3(6Z,9Z,12Z))             | 714.10 | 0.99   |
| PC(13:0/20:3(8Z,11Z,14Z))            | 740.83 | 5.91   |
| PC(13:0/20:4(5Z,8Z,11Z,14Z))         | 738.71 | 65.81  |
| PC(13:0/20:5(5Z,8Z,11Z,14Z,17Z))     | 737.28 | 27.52  |
| PC(13:0/22:2(13Z,16Z))               | 771.32 | 3.34   |
| PC(13:0/22:6(4Z,7Z,10Z,13Z,16Z,19Z)) | 763.51 | 47.73  |
| PC(14:0/18:1(11Z))                   | 731.10 | 19.47  |
| PC(14:0/18:3(9Z,12Z,15Z))            | 727.40 | 39.87  |
| PC(14:0/18:4(6Z,9Z,12Z,15Z))         | 725.05 | 8.00   |
| PC(14:0/20:4(5Z,8Z,11Z,14Z))         | 753.12 | 21.04  |

|                                          |        |        |
|------------------------------------------|--------|--------|
| PC(14:0/20:5(5Z,8Z,11Z,14Z,17Z))         | 750.70 | 20.19  |
| PC(14:0/24:1(15Z))                       | 814.83 | 22.92  |
| PC(14:0/26:0)                            | 845.71 | 5.11   |
| PC(14:1(9Z)/0:0)                         | 465.68 | 4.58   |
| PC(15:0/18:1(11Z))                       | 744.93 | 2.97   |
| PC(15:0/18:2(9Z,12Z))                    | 742.61 | 2.05   |
| PC(15:0/20:3(8Z,11Z,14Z))                | 769.89 | 20.70  |
| PC(15:0/20:5(5Z,8Z,11Z,14Z,17Z))         | 765.45 | 17.76  |
| PC(15:0/22:1(11Z))                       | 801.80 | 28.23  |
| PC(15:0/22:6(4Z,7Z,10Z,13Z,16Z,19Z))     | 792.00 | 2.05   |
| PC(15:1(9Z)/0:0)                         | 479.20 | 3.37   |
| PC(15:1(9Z)/22:2(13Z,16Z))               | 797.49 | 14.50  |
| PC(15:1(9Z)/22:4(7Z,10Z,13Z,16Z))        | 793.57 | 11.91  |
| PC(16:0/15:1(14))                        | 716.75 | 13.01  |
| PC(16:0/18:1(9Z))                        | 760.00 | 13.57  |
| PC(16:0/18:2(10E,12Z))                   | 757.24 | 116.42 |
| PC(16:0/18:3(6Z,9Z,12Z))                 | 756.08 | 9.68   |
| PC(16:0/2:0)                             | 538.28 | 14.26  |
| PC(16:0/20:3(5Z,8Z,11Z))                 | 783.27 | 10.15  |
| PC(16:0/20:4(5Z,8Z,11Z,14Z))             | 781.35 | 2.81   |
| PC(16:0/20:5(5Z,8Z,11Z,14Z,17Z))         | 779.87 | 11.60  |
| PC(16:0/22:4(7Z,10Z,13Z,16Z))            | 810.23 | 21.13  |
| PC(16:0/22:5(4Z,7Z,10Z,13Z,16Z))         | 807.62 | 25.05  |
| PC(16:0/22:6(4E,7E,10E,13E,16E,19E))     | 804.69 | 3.28   |
| PC(16:0/23:5(8E,11E,14E,17E,20E))        | 821.26 | 20.71  |
| PC(16:0/24:1(15Z))                       | 843.97 | 1.22   |
| PC(16:0/26:0)                            | 873.58 | 10.08  |
| PC(16:0/26:2(5Z,9Z))                     | 869.11 | 7.63   |
| PC(16:0/3:0)                             | 551.39 | 9.91   |
| PC(16:0/3:1(2E))                         | 549.34 | 63.87  |
| PC(16:0/5:0(COOH))                       | 609.51 | 2.93   |
| PC(16:0/5:0)                             | 578.75 | 1.34   |
| PC(16:0/5:1(4E))                         | 576.64 | 8.40   |
| PC(16:0/9:0(COOH))                       | 666.21 | 9.21   |
| PC(16:1(9E)/0:0)                         | 493.72 | 9.06   |
| PC(16:1(9Z)/2:0)                         | 534.41 | 8.04   |
| PC(16:1(9Z)/22:6(4Z,7Z,10Z,13Z,16Z,19Z)) | 803.72 | 1.77   |
| PC(17:0/10:0)                            | 663.46 | 19.72  |
| PC(17:0/18:1(9Z))                        | 774.16 | 61.91  |
| PC(17:0/20:4(5Z,8Z,11Z,14Z))             | 795.61 | 13.00  |
| PC(17:0/22:2(13Z,16Z))                   | 827.56 | 20.14  |
| PC(17:0/22:6(4Z,7Z,10Z,13Z,16Z,19Z))     | 819.91 | 4.62   |
| PC(17:1(9Z)/22:2(13Z,16Z))               | 826.25 | 12.64  |
| PC(17:2(9Z,12Z)/0:0)                     | 504.51 | 3.98   |
| PC(18:0/11:1(10E))                       | 689.68 | 35.43  |
| PC(18:0/18:1(11Z))                       | 787.89 | 179.26 |
| PC(18:0/18:2(10Z,12Z))                   | 785.26 | 13.24  |
| PC(18:0/22:3(10Z,13Z,16Z))               | 839.30 | 37.79  |
| PC(18:0/22:4(7Z,10Z,13Z,16Z))            | 837.56 | 17.15  |



|                                                      |        |        |
|------------------------------------------------------|--------|--------|
| PC(18:0/24:1(15Z))                                   | 872.37 | 10.83  |
| PC(18:1(11Z)/22:6(4Z,7Z,10Z,13Z,16Z,19Z))            | 831.63 | 10.83  |
| PC(18:1(9Z)/4:0)                                     | 590.76 | 2.81   |
| PC(18:2(2E,4E)/0:0)                                  | 519.24 | 1.65   |
| PC(18:3(9Z,12Z,15Z)/0:0)                             | 517.50 | 9.09   |
| PC(18:4(9E,11E,13E,15E)/0:0)                         | 514.74 | 3.22   |
| PC(19:0/22:1(11Z))                                   | 857.85 | 20.72  |
| PC(19:0/22:2(13Z,16Z))                               | 856.52 | 8.25   |
| PC(19:0/22:6(4Z,7Z,10Z,13Z,16Z,19Z))                 | 848.37 | 14.38  |
| PC(19:1(9Z)/22:4(7Z,10Z,13Z,16Z))                    | 849.75 | 6.00   |
| PC(20:0/20:2(11Z,14Z))                               | 841.20 | 42.56  |
| PC(20:0/22:4(7Z,10Z,13Z,16Z))                        | 865.67 | 112.21 |
| PC(20:0/22:5(7Z,10Z,13Z,16Z,19Z))                    | 863.39 | 2.73   |
| PC(20:0/22:6(4Z,7Z,10Z,13Z,16Z,19Z))                 | 861.55 | 46.58  |
| PC(20:0/24:1(15Z))                                   | 899.26 | 14.85  |
| PC(20:1(11Z)/22:2(13Z,16Z))                          | 867.74 | 4.25   |
| PC(20:3(8Z,11Z,14Z)/0:0)                             | 544.67 | 0.99   |
| PC(20:5(5Z,8Z,11Z,14Z,17Z)/0:0)                      | 541.19 | 10.32  |
| PC(20:5(5Z,8Z,11Z,14Z,17Z)/22:5(7Z,10Z,13Z,16Z,19Z)) | 853.86 | 14.62  |
| PC(21:0/22:1(11Z))                                   | 886.35 | 4.78   |
| PC(21:0/22:2(13Z,16Z))                               | 884.68 | 3.69   |
| PC(21:0/22:4(7Z,10Z,13Z,16Z))                        | 880.28 | 11.61  |
| PC(21:0/22:6(4Z,7Z,10Z,13Z,16Z,19Z))                 | 876.50 | 22.99  |
| PC(22:0/22:4(7Z,10Z,13Z,16Z))                        | 894.17 | 1.41   |
| PC(22:1(11Z)/22:4(7Z,10Z,13Z,16Z))                   | 891.13 | 62.63  |
| PC(22:1(13E)/22:1(13E))                              | 897.74 | 6.69   |
| PC(22:4(7Z,10Z,13Z,16Z)/0:0)                         | 571.46 | 5.61   |
| PC(22:4(7Z,10Z,13Z,16Z)/22:6(4Z,7Z,10Z,13Z,16Z,19Z)) | 881.56 | 6.23   |
| PC(22:6(4Z,7Z,10Z,13Z,16Z,19Z)/0:0)                  | 567.28 | 9.61   |
| PC(24:0/0:0)                                         | 606.81 | 0.72   |
| PC(6:0/6:0)                                          | 453.37 | 11.97  |
| PC(6:2(2E,4E)/6:2(2E,4E))                            | 445.00 | 13.16  |
| PC(6:2(3E,5E)/14:2(11E,13E))                         | 557.53 | 1.69   |
| PC(O-11:1(10E)/2:0)                                  | 450.94 | 1.80   |
| PC(O-14:0/2:0)                                       | 495.04 | 36.39  |
| PC(O-16:0/2:0)                                       | 523.13 | 5.58   |
| PC(O-16:1(11Z)/2:0)                                  | 522.19 | 10.32  |
| PC(O-18:0/22:5(4Z,7Z,10Z,13Z,16Z))                   | 822.60 | 11.25  |
| PC(O-18:2(9Z,12Z)/2:0)                               | 547.63 | 1.59   |
| PC(O-8:0/2:0)                                        | 411.38 | 12.96  |
|                                                      | 400.52 | 0.28   |
|                                                      | 401.52 | 0.63   |
|                                                      | 401.57 | 5.81   |
|                                                      | 403.81 | 5.80   |
|                                                      | 405.32 | 0.63   |
|                                                      | 405.80 | 1.64   |
|                                                      | 409.31 | 8.06   |
|                                                      | 416.43 | 5.78   |
|                                                      | 418.40 | 0.17   |

|        |       |
|--------|-------|
| 420.17 | 7.54  |
| 421.06 | 7.47  |
| 423.62 | 21.32 |
| 427.52 | 1.03  |
| 427.79 | 2.35  |
| 428.80 | 1.25  |
| 432.62 | 2.96  |
| 433.66 | 5.94  |
| 435.30 | 12.70 |
| 435.47 | 10.95 |
| 435.73 | 1.29  |
| 442.07 | 1.16  |
| 443.08 | 1.78  |
| 448.26 | 17.60 |
| 449.99 | 0.15  |
| 458.14 | 4.53  |
| 459.91 | 1.19  |
| 461.13 | 5.70  |
| 461.25 | 17.65 |
| 462.92 | 0.17  |
| 468.57 | 1.24  |
| 470.82 | 4.35  |
| 471.70 | 2.79  |
| 472.18 | 0.21  |
| 473.26 | 40.94 |
| 475.27 | 3.49  |
| 476.78 | 3.68  |
| 477.88 | 1.45  |
| 482.78 | 4.05  |
| 484.80 | 4.76  |
| 485.87 | 2.94  |
| 487.28 | 4.85  |
| 492.20 | 0.58  |
| 492.26 | 1.96  |
| 496.55 | 0.33  |
| 497.34 | 3.06  |
| 498.19 | 1.31  |
| 498.71 | 22.76 |
| 500.17 | 2.83  |
| 511.37 | 1.34  |
| 513.59 | 5.88  |
| 513.77 | 3.27  |
| 524.90 | 32.57 |
| 526.90 | 13.44 |
| 527.79 | 4.80  |
| 532.74 | 2.58  |
| 539.74 | 0.39  |
| 553.39 | 9.14  |
| 553.41 | 0.92  |

|        |       |
|--------|-------|
| 555.12 | 27.91 |
| 556.25 | 1.76  |
| 558.35 | 11.27 |
| 559.41 | 3.10  |
| 560.70 | 2.95  |
| 569.80 | 5.05  |
| 580.75 | 0.29  |
| 581.26 | 1.90  |
| 583.29 | 2.19  |
| 583.65 | 1.25  |
| 585.16 | 5.55  |
| 586.08 | 7.29  |
| 587.50 | 0.71  |
| 587.59 | 3.34  |
| 588.52 | 0.51  |
| 596.21 | 0.90  |
| 596.85 | 0.34  |
| 596.87 | 3.23  |
| 604.48 | 10.29 |
| 605.53 | 7.28  |
| 610.44 | 10.76 |
| 611.58 | 1.78  |
| 614.18 | 0.84  |
| 614.71 | 1.13  |
| 617.88 | 0.84  |
| 619.32 | 5.21  |
| 619.36 | 11.68 |
| 624.15 | 0.85  |
| 624.55 | 15.04 |
| 625.51 | 1.93  |
| 625.78 | 6.82  |
| 627.38 | 26.36 |
| 628.80 | 2.09  |
| 629.63 | 6.34  |
| 630.92 | 6.42  |
| 633.13 | 9.51  |
| 637.38 | 0.43  |
| 637.51 | 5.55  |
| 639.81 | 1.07  |
| 643.80 | 11.14 |
| 646.05 | 16.05 |
| 652.98 | 3.51  |
| 653.18 | 1.29  |
| 655.55 | 2.68  |
| 657.60 | 16.21 |
| 660.12 | 1.44  |
| 668.87 | 5.36  |
| 671.60 | 6.05  |
| 671.64 | 3.44  |

|        |       |
|--------|-------|
| 680.53 | 27.74 |
| 680.61 | 5.34  |
| 684.07 | 1.69  |
| 684.59 | 4.71  |
| 685.58 | 11.15 |
| 686.17 | 2.08  |
| 694.13 | 16.62 |
| 694.50 | 0.28  |
| 694.74 | 3.31  |
| 696.01 | 4.68  |
| 708.29 | 6.46  |
| 709.15 | 1.30  |
| 720.60 | 19.38 |
| 721.25 | 15.61 |
| 735.09 | 3.72  |

---

**60 min exposure to 11 M NaOH**

|                                      |        |        |
|--------------------------------------|--------|--------|
| PC(13:0/13:0)                        | 650.00 | 14.64  |
| PC(10:0/18:0)                        | 677.25 | 3.97   |
| PC(10:0/18:1(9Z))                    | 675.48 | 20.78  |
| PC(10:0/20:0)                        | 705.01 | 57.03  |
| PC(10:0/21:0)                        | 719.53 | 24.84  |
| PC(10:0/22:0)                        | 732.63 | 28.85  |
| PC(10:0/23:0)                        | 748.21 | 13.22  |
| PC(10:0/24:0)                        | 762.00 | 140.57 |
| PC(10:0/25:0)                        | 776.22 | 31.23  |
| PC(10:0/4:0)                         | 480.55 | 11.45  |
| PC(11:0/11:0)                        | 593.90 | 0.88   |
| PC(12:0/12:0)                        | 621.02 | 13.94  |
| PC(12:0/13:0)                        | 636.42 | 6.78   |
| PC(12:0/14:1(9Z))                    | 648.13 | 23.15  |
| PC(12:0/15:1(9Z))                    | 661.35 | 25.90  |
| PC(12:0/17:2(9Z,12Z))                | 687.31 | 19.90  |
| PC(12:0/18:1(9Z))                    | 703.22 | 165.07 |
| PC(12:0/18:2(9Z,12Z))                | 701.04 | 4.45   |
| PC(12:0/18:3(6Z,9Z,12Z))             | 699.82 | 55.21  |
| PC(12:0/18:4(6Z,9Z,12Z,15Z))         | 697.69 | 23.60  |
| PC(12:0/20:5(5Z,8Z,11Z,14Z,17Z))     | 723.28 | 77.48  |
| PC(12:0/22:6(4Z,7Z,10Z,13Z,16Z,19Z)) | 748.67 | 89.06  |
| PC(13:0/18:4(6Z,9Z,12Z,15Z))         | 711.23 | 50.14  |
| PC(13:0/20:3(8Z,11Z,14Z))            | 741.08 | 6.98   |
| PC(13:0/20:4(5Z,8Z,11Z,14Z))         | 739.38 | 55.85  |
| PC(13:0/22:2(13Z,16Z))               | 772.19 | 20.50  |
| PC(14:0/18:1(11Z))                   | 731.56 | 41.24  |
| PC(14:0/18:2(11Z,14Z))               | 729.55 | 21.02  |
| PC(14:0/18:4(6Z,9Z,12Z,15Z))         | 725.21 | 117.62 |
| PC(14:0/20:4(5Z,8Z,11Z,14Z))         | 753.84 | 13.15  |
| PC(14:0/22:6(4Z,7Z,10Z,13Z,16Z,19Z)) | 777.69 | 26.54  |
| PC(14:0/24:1(15Z))                   | 815.01 | 131.29 |
| PC(15:0/18:1(11Z))                   | 746.16 | 10.63  |

|                                           |        |        |
|-------------------------------------------|--------|--------|
| PC(15:0/18:2(9Z,12Z))                     | 742.96 | 1.79   |
| PC(15:0/20:3(8Z,11Z,14Z))                 | 770.19 | 31.03  |
| PC(15:0/20:5(5Z,8Z,11Z,14Z,17Z))          | 765.51 | 16.80  |
| PC(15:0/22:1(11Z))                        | 800.99 | 47.07  |
| PC(15:1(9Z)/22:2(13Z,16Z))                | 798.54 | 23.10  |
| PC(15:1(9Z)/22:4(7Z,10Z,13Z,16Z))         | 793.60 | 34.19  |
| PC(16:0/18:1(9Z))                         | 759.71 | 11.44  |
| PC(16:0/18:2(10E,12Z))                    | 757.16 | 14.49  |
| PC(16:0/18:3(6Z,9Z,12Z))                  | 755.07 | 58.49  |
| PC(16:0/2:0)                              | 537.72 | 9.78   |
| PC(16:0/20:4(5Z,8Z,11Z,14Z))              | 780.87 | 258.52 |
| PC(16:0/20:5(5Z,8Z,11Z,14Z,17Z))          | 779.25 | 2.35   |
| PC(16:0/22:5(4Z,7Z,10Z,13Z,16Z))          | 807.79 | 19.00  |
| PC(16:0/22:6(4E,7E,10E,13E,16E,19E))      | 806.23 | 174.44 |
| PC(16:0/24:1(15Z))                        | 843.91 | 36.12  |
| PC(16:0/26:0)                             | 873.20 | 50.12  |
| PC(16:0/3:0)                              | 551.25 | 5.81   |
| PC(16:0/5:0(COOH))                        | 609.60 | 8.84   |
| PC(16:0/5:0)                              | 579.00 | 14.13  |
| PC(16:0/9:0(COOH))                        | 665.34 | 7.44   |
| PC(16:1(9E)/0:0)                          | 494.24 | 14.94  |
| PC(16:1(9Z)/22:6(4Z,7Z,10Z,13Z,16Z,19Z))  | 804.31 | 291.78 |
| PC(17:0/10:0)                             | 664.27 | 3.11   |
| PC(17:0/18:1(9Z))                         | 774.06 | 12.62  |
| PC(17:0/20:4(5Z,8Z,11Z,14Z))              | 795.35 | 7.83   |
| PC(17:0/22:2(13Z,16Z))                    | 828.28 | 32.95  |
| PC(17:1(10Z)/0:0)                         | 507.18 | 39.14  |
| PC(17:1(9Z)/22:2(13Z,16Z))                | 825.69 | 35.24  |
| PC(17:2(9Z,12Z)/0:0)                      | 505.06 | 4.36   |
| PC(18:0/11:1(10E))                        | 689.58 | 13.52  |
| PC(18:0/18:0)                             | 788.63 | 8.13   |
| PC(18:0/18:1(11Z))                        | 787.93 | 86.39  |
| PC(18:0/18:2(10Z,12Z))                    | 786.25 | 133.78 |
| PC(18:0/20:2(11Z,14Z))                    | 813.73 | 4.01   |
| PC(18:0/22:3(10Z,13Z,16Z))                | 839.53 | 18.87  |
| PC(18:0/22:5(4Z,7Z,10Z,13Z,16Z))          | 834.69 | 52.12  |
| PC(18:0/22:6(4Z,7Z,10Z,13Z,16Z,19Z))      | 832.62 | 118.12 |
| PC(18:1(11Z)/22:6(4Z,7Z,10Z,13Z,16Z,19Z)) | 831.99 | 0.82   |
| PC(18:1(9E)/2:0)                          | 563.51 | 24.06  |
| PC(18:1(9Z)/4:0)                          | 591.23 | 7.57   |
| PC(18:2(2E,4E)/0:0)                       | 519.68 | 0.58   |
| PC(18:3(9Z,12Z,15Z)/0:0)                  | 516.42 | 44.57  |
| PC(19:0/22:1(11Z))                        | 858.08 | 14.53  |
| PC(19:0/22:2(13Z,16Z))                    | 855.17 | 31.82  |
| PC(19:0/22:6(4Z,7Z,10Z,13Z,16Z,19Z))      | 847.91 | 51.98  |
| PC(19:1(9Z)/22:4(7Z,10Z,13Z,16Z))         | 849.20 | 14.17  |
| PC(19:3(10Z,13Z,16Z)/0:0)                 | 530.59 | 7.40   |
| PC(20:0/20:2(11Z,14Z))                    | 842.20 | 4.19   |
| PC(20:0/22:4(7Z,10Z,13Z,16Z))             | 866.33 | 9.86   |

|                                                             |        |        |
|-------------------------------------------------------------|--------|--------|
| PC(20:0/22:5(7Z,10Z,13Z,16Z,19Z))                           | 863.77 | 17.52  |
| PC(20:1(11Z)/22:2(13Z,16Z))                                 | 867.83 | 20.75  |
| PC(20:3(8Z,11Z,14Z)/0:0)                                    | 545.44 | 14.79  |
| PC(20:4(5Z,8Z,11Z,14Z)/0:0)                                 | 543.39 | 33.82  |
| PC(20:5(5Z,8Z,11Z,14Z,17Z)/0:0)                             | 540.72 | 10.03  |
| PC(20:5(5Z,8Z,11Z,14Z,17Z)/22:6(4Z,7Z,10Z,13Z,16Z,19Z))     | 851.21 | 100.88 |
| PC(21:0/22:1(11Z))                                          | 886.41 | 11.41  |
| PC(21:0/22:2(13Z,16Z))                                      | 883.59 | 23.06  |
| PC(21:0/22:4(7Z,10Z,13Z,16Z))                               | 880.62 | 2.69   |
| PC(21:0/22:6(4Z,7Z,10Z,13Z,16Z,19Z))                        | 874.90 | 11.66  |
| PC(22:0/22:4(7Z,10Z,13Z,16Z))                               | 893.82 | 42.94  |
| PC(22:0/22:6(4Z,7Z,10Z,13Z,16Z,19Z))                        | 889.09 | 8.35   |
| PC(22:1(11Z)/22:4(7Z,10Z,13Z,16Z))                          | 891.20 | 3.22   |
| PC(22:1(13E)/22:1(13E))                                     | 898.44 | 4.66   |
| PC(22:2(13Z,16Z)/0:0)                                       | 574.66 | 14.98  |
| PC(22:4(7Z,10Z,13Z,16Z)/0:0)                                | 572.06 | 2.63   |
| PC(22:4(7Z,10Z,13Z,16Z)/22:6(4Z,7Z,10Z,13Z,16Z,19Z))        | 881.43 | 4.58   |
| PC(22:6(4Z,7Z,10Z,13Z,16Z,19Z)/0:0)                         | 567.73 | 8.92   |
| PC(22:6(4Z,7Z,10Z,13Z,16Z,19Z)/22:6(4Z,7Z,10Z,13Z,16Z,19Z)) | 877.15 | 50.07  |
| PC(23:0/18:0)                                               | 859.37 | 11.46  |
| PC(24:0/0:0)                                                | 607.10 | 2.12   |
| PC(25:0/18:0)                                               | 888.60 | 34.34  |
| PC(6:0/6:0)                                                 | 453.02 | 3.79   |
| PC(6:2(2E,4E)/6:2(2E,4E))                                   | 444.90 | 12.57  |
| PC(6:2(3E,5E)/14:2(11E,13E))                                | 557.08 | 10.15  |
| PC(8:2(2E,4E)/8:2(2E,4E))                                   | 500.55 | 12.67  |
| PC(O-10:1(9E)/2:0)                                          | 437.03 | 11.01  |
| PC(O-11:1(10E)/2:0)                                         | 451.22 | 1.54   |
| PC(O-12:0/2:0)                                              | 467.58 | 7.89   |
| PC(O-14:0/2:0)                                              | 495.90 | 14.44  |
| PC(O-16:0/2:0)                                              | 522.96 | 10.47  |
| PC(O-16:1(11Z)/2:0)                                         | 521.19 | 4.98   |
| PC(O-18:2(9Z,12Z)/2:0)                                      | 547.95 | 6.69   |
| PC(O-8:0/2:0)                                               | 411.44 | 1.32   |
|                                                             | 400.60 | 7.72   |
|                                                             | 401.82 | 0.57   |
|                                                             | 402.29 | 0.40   |
|                                                             | 403.16 | 7.19   |
|                                                             | 405.36 | 1.20   |
|                                                             | 405.93 | 4.94   |
|                                                             | 406.13 | 16.52  |
|                                                             | 407.07 | 6.57   |
|                                                             | 409.93 | 5.20   |
|                                                             | 413.13 | 5.00   |
|                                                             | 413.51 | 57.15  |
|                                                             | 414.77 | 0.95   |
|                                                             | 414.92 | 42.27  |
|                                                             | 417.54 | 92.11  |
|                                                             | 419.06 | 23.96  |

|        |       |
|--------|-------|
| 421.63 | 0.56  |
| 422.64 | 13.77 |
| 423.80 | 34.99 |
| 426.76 | 41.07 |
| 428.14 | 5.87  |
| 428.57 | 5.13  |
| 429.39 | 0.21  |
| 430.04 | 7.23  |
| 430.95 | 38.07 |
| 435.53 | 2.58  |
| 441.28 | 0.81  |
| 443.16 | 8.26  |
| 443.44 | 2.39  |
| 447.20 | 1.67  |
| 448.58 | 1.60  |
| 449.26 | 25.73 |
| 454.96 | 4.25  |
| 457.53 | 14.44 |
| 457.93 | 2.62  |
| 459.05 | 1.60  |
| 459.56 | 15.41 |
| 460.82 | 12.04 |
| 460.92 | 1.73  |
| 461.82 | 0.68  |
| 463.16 | 22.00 |
| 470.17 | 67.57 |
| 470.73 | 3.23  |
| 471.80 | 5.93  |
| 474.63 | 5.99  |
| 475.34 | 47.45 |
| 476.45 | 3.28  |
| 476.69 | 1.60  |
| 477.94 | 8.43  |
| 483.60 | 5.81  |
| 484.37 | 3.17  |
| 484.42 | 4.05  |
| 486.73 | 6.07  |
| 490.58 | 2.30  |
| 491.61 | 8.85  |
| 491.94 | 2.93  |
| 496.52 | 17.21 |
| 497.16 | 12.94 |
| 503.26 | 13.22 |
| 511.41 | 17.50 |
| 513.93 | 2.02  |
| 525.44 | 1.43  |
| 525.45 | 85.86 |
| 532.68 | 70.31 |
| 532.97 | 30.91 |

|        |       |
|--------|-------|
| 540.28 | 11.83 |
| 553.00 | 3.16  |
| 553.96 | 76.46 |
| 554.78 | 37.76 |
| 554.96 | 1.32  |
| 560.74 | 1.65  |
| 561.44 | 25.98 |
| 561.67 | 1.37  |
| 572.77 | 10.68 |
| 573.64 | 22.48 |
| 573.85 | 4.15  |
| 581.49 | 67.86 |
| 581.94 | 3.24  |
| 582.28 | 1.78  |
| 582.68 | 5.28  |
| 583.95 | 12.19 |
| 585.52 | 7.72  |
| 587.23 | 4.26  |
| 588.71 | 13.05 |
| 589.32 | 0.49  |
| 589.57 | 11.38 |
| 595.03 | 6.24  |
| 595.57 | 1.71  |
| 597.21 | 10.73 |
| 598.51 | 0.61  |
| 599.75 | 4.83  |
| 600.91 | 9.67  |
| 602.45 | 6.54  |
| 602.92 | 37.31 |
| 603.83 | 21.75 |
| 611.83 | 13.73 |
| 613.59 | 15.03 |
| 614.31 | 12.85 |
| 615.06 | 3.12  |
| 617.00 | 4.95  |
| 617.78 | 1.56  |
| 618.04 | 6.93  |
| 618.48 | 0.84  |
| 618.94 | 4.16  |
| 619.06 | 12.69 |
| 625.16 | 3.97  |
| 628.36 | 6.51  |
| 630.91 | 1.94  |
| 631.16 | 11.34 |
| 632.25 | 18.92 |
| 637.23 | 2.80  |
| 639.69 | 11.61 |
| 641.94 | 0.42  |
| 643.15 | 0.48  |



|        |       |
|--------|-------|
| 651.62 | 5.00  |
| 652.06 | 55.81 |
| 652.34 | 39.65 |
| 654.35 | 2.07  |
| 656.89 | 13.49 |
| 658.36 | 17.43 |
| 658.95 | 27.39 |
| 666.54 | 0.93  |
| 669.95 | 18.99 |
| 670.63 | 1.35  |
| 672.04 | 23.42 |
| 672.11 | 7.98  |
| 682.23 | 0.92  |
| 683.27 | 15.20 |
| 683.78 | 2.36  |
| 684.17 | 16.85 |
| 692.66 | 23.40 |
| 695.30 | 1.47  |
| 695.30 | 30.19 |
| 708.57 | 59.77 |
| 709.92 | 42.65 |
| 720.65 | 55.94 |
| 722.45 | 5.44  |
| 734.90 | 75.96 |
| 734.90 | 13.29 |
| 736.37 | 45.95 |

---

The identifiable phosphatidylcholine (PC) species present in the porcine control group and experimental groups have been listed here. The average m/z and lipid amount in pmol/ $\mu$ g corresponding to the PC species have been provided. Also listed are the species that are not identified in the database, arranged by m/z. \*The lipid species identification is based on Lipidmaps database, used as a \*.csv file for bioinformatic analyses with MZmine 2.2 program. \*\* A representative mass/charge ratio is presented (variations in m/z was reconciled by MZmine 2.2) .

**Supplemental Table S2: Phosphocholine species present in human cornea.**

| Lipid Species*                       | m/z**  | Average lipid amount<br>(pmol per species/ $\mu$ g<br>protein) |
|--------------------------------------|--------|----------------------------------------------------------------|
| <b>Control corneas</b>               |        |                                                                |
| PC(10:0/10:0)                        | 564.73 | 13.07                                                          |
| PC(13:0/13:0)                        | 650.00 | 34.41                                                          |
| PC(10:0/18:0)                        | 676.79 | 22.45                                                          |
| PC(10:0/18:1(9Z))                    | 675.00 | 15.60                                                          |
| PC(10:0/18:2(9Z,12Z))                | 673.57 | 4.05                                                           |
| PC(10:0/19:0)                        | 691.97 | 6.47                                                           |
| PC(10:0/20:0)                        | 705.01 | 1.93                                                           |
| PC(10:0/21:0)                        | 719.00 | 8.66                                                           |
| PC(10:0/22:0)                        | 733.04 | 37.47                                                          |
| PC(10:0/23:0)                        | 747.42 | 10.08                                                          |
| PC(10:0/24:0)                        | 762.15 | 7.77                                                           |
| PC(10:0/4:0)                         | 480.97 | 1.93                                                           |
| PC(11:0/11:0)                        | 592.45 | 4.57                                                           |
| PC(12:0/13:0)                        | 635.41 | 2.78                                                           |
| PC(12:0/14:1(9Z))                    | 647.68 | 1.44                                                           |
| PC(12:0/15:1(9Z))                    | 660.55 | 7.66                                                           |
| PC(12:0/18:1(9Z))                    | 703.84 | 36.75                                                          |
| PC(12:0/18:2(9Z,12Z))                | 701.72 | 18.12                                                          |
| PC(12:0/18:3(6Z,9Z,12Z))             | 699.60 | 3.50                                                           |
| PC(12:0/18:4(6Z,9Z,12Z,15Z))         | 698.43 | 0.97                                                           |
| PC(12:0/26:0)                        | 817.41 | 33.34                                                          |
| PC(13:0/18:3(6Z,9Z,12Z))             | 712.80 | 10.25                                                          |
| PC(13:0/18:4(6Z,9Z,12Z,15Z))         | 712.28 | 3.01                                                           |
| PC(13:0/20:3(8Z,11Z,14Z))            | 741.59 | 64.94                                                          |
| PC(13:0/20:4(5Z,8Z,11Z,14Z))         | 738.86 | 15.64                                                          |
| PC(13:0/20:5(5Z,8Z,11Z,14Z,17Z))     | 737.31 | 37.41                                                          |
| PC(13:0/22:2(13Z,16Z))               | 771.87 | 39.12                                                          |
| PC(14:0/18:2(11Z,14Z))               | 729.47 | 1.49                                                           |
| PC(14:0/18:3(9Z,12Z,15Z))            | 727.47 | 11.58                                                          |
| PC(14:0/18:4(6Z,9Z,12Z,15Z))         | 725.80 | 1.24                                                           |
| PC(14:0/2:0)                         | 509.19 | 18.14                                                          |
| PC(14:0/20:4(5Z,8Z,11Z,14Z))         | 753.35 | 1.97                                                           |
| PC(14:0/20:5(5Z,8Z,11Z,14Z,17Z))     | 752.23 | 4.33                                                           |
| PC(14:0/22:6(4Z,7Z,10Z,13Z,16Z,19Z)) | 777.35 | 12.95                                                          |
| PC(14:0/24:1(15Z))                   | 815.62 | 105.82                                                         |
| PC(15:0/18:1(11Z))                   | 745.26 | 17.42                                                          |
| PC(15:0/20:3(8Z,11Z,14Z))            | 768.89 | 33.42                                                          |
| PC(15:0/22:2(13Z,16Z))               | 799.87 | 67.63                                                          |
| PC(15:1(9Z)/0:0)                     | 479.48 | 1.13                                                           |
| PC(15:1(9Z)/22:2(13Z,16Z))           | 797.49 | 16.28                                                          |
| PC(15:1(9Z)/22:4(7Z,10Z,13Z,16Z))    | 792.66 | 119.52                                                         |
| PC(16:0/15:1(14))                    | 717.54 | 3.45                                                           |
| PC(16:0/18:1(9Z))                    | 759.54 | 89.32                                                          |
| PC(16:0/18:3(6Z,9Z,12Z))             | 755.45 | 11.27                                                          |
| PC(16:0/2:0)                         | 537.41 | 7.64                                                           |
| PC(16:0/20:5(5Z,8Z,11Z,14Z,17Z))     | 779.33 | 64.48                                                          |
| PC(16:0/22:5(4Z,7Z,10Z,13Z,16Z))     | 806.90 | 34.04                                                          |
| PC(16:0/22:6(4E,7E,10E,13E,16E,19E)) | 805.53 | 91.99                                                          |

|                                                         |        |        |
|---------------------------------------------------------|--------|--------|
| PC(16:0/23:5(8E,11E,14E,17E,20E))                       | 821.82 | 10.77  |
| PC(16:0/24:1(15Z))                                      | 843.39 | 34.04  |
| PC(16:0/26:2(5Z,9Z))                                    | 869.73 | 17.42  |
| PC(16:0/3:0)                                            | 551.40 | 4.11   |
| PC(16:0/3:1(2E))                                        | 549.99 | 3.14   |
| PC(16:0/5:0(COOH))                                      | 609.85 | 1.50   |
| PC(16:0/5:0)                                            | 578.76 | 2.58   |
| PC(16:0/5:1(4E))                                        | 577.94 | 4.39   |
| PC(16:0/9:0(COOH))                                      | 665.70 | 17.61  |
| PC(16:1(9E)/0:0)                                        | 492.95 | 1.16   |
| PC(16:1(9Z)/2:0)                                        | 535.60 | 2.47   |
| PC(16:1(9Z)/22:6(4Z,7Z,10Z,13Z,16Z,19Z))                | 802.90 | 9.51   |
| PC(16:1(9Z)/22:6(4Z,7Z,10Z,13Z,16Z,19Z))                | 803.19 | 13.56  |
| PC(17:0/10:0)                                           | 663.50 | 18.91  |
| PC(17:0/18:1(9Z))                                       | 773.85 | 83.05  |
| PC(17:0/20:4(5Z,8Z,11Z,14Z))                            | 795.56 | 5.19   |
| PC(17:0/22:4(7Z,10Z,13Z,16Z))                           | 824.23 | 48.94  |
| PC(17:0/22:6(4Z,7Z,10Z,13Z,16Z,19Z))                    | 819.79 | 54.61  |
| PC(17:1(10Z)/0:0)                                       | 507.04 | 2.45   |
| PC(17:1(9Z)/22:2(13Z,16Z))                              | 826.04 | 28.84  |
| PC(17:2(9Z,12Z)/0:0)                                    | 504.95 | 0.78   |
| PC(18:0/11:1(10E))                                      | 689.95 | 2.78   |
| PC(18:0/18:0)                                           | 789.88 | 64.39  |
| PC(18:0/18:1(11Z))                                      | 788.45 | 108.30 |
| PC(18:0/18:2(10Z,12Z))                                  | 785.94 | 54.68  |
| PC(18:0/20:2(11Z,14Z))                                  | 813.51 | 3.70   |
| PC(18:0/22:3(10Z,13Z,16Z))                              | 839.62 | 27.65  |
| PC(18:0/22:4(7Z,10Z,13Z,16Z))                           | 836.98 | 21.87  |
| PC(18:0/22:6(4Z,7Z,10Z,13Z,16Z,19Z))                    | 833.51 | 6.59   |
| PC(18:0/24:1(15Z))                                      | 871.49 | 41.44  |
| PC(18:1(11Z)/22:6(4Z,7Z,10Z,13Z,16Z,19Z))               | 832.29 | 4.28   |
| PC(18:2(2E,4E)/0:0)                                     | 519.83 | 7.30   |
| PC(18:2(9Z,12Z)/22:6(4Z,7Z,10Z,13Z,16Z,19Z))            | 829.98 | 2.98   |
| PC(18:4(9E,11E,13E,15E)/0:0)                            | 515.56 | 2.13   |
| PC(19:0/22:2(13Z,16Z))                                  | 855.36 | 36.96  |
| PC(19:0/22:6(4Z,7Z,10Z,13Z,16Z,19Z))                    | 847.68 | 75.94  |
| PC(19:1(9Z)/22:2(13Z,16Z))                              | 854.59 | 9.48   |
| PC(19:1(9Z)/22:4(7Z,10Z,13Z,16Z))                       | 848.82 | 36.44  |
| PC(19:3(10Z,13Z,16Z)/0:0)                               | 531.41 | 2.10   |
| PC(20:0/22:4(7Z,10Z,13Z,16Z))                           | 865.66 | 52.37  |
| PC(20:0/22:5(7Z,10Z,13Z,16Z,19Z))                       | 863.50 | 33.44  |
| PC(20:0/22:6(4Z,7Z,10Z,13Z,16Z,19Z))                    | 861.73 | 28.17  |
| PC(20:0/24:1(15Z))                                      | 899.44 | 1.61   |
| PC(20:1(11Z)/22:2(13Z,16Z))                             | 868.45 | 1.12   |
| PC(20:4(5Z,8Z,11Z,14Z)/0:0)                             | 544.01 | 1.82   |
| PC(20:5(5Z,8Z,11Z,14Z,17Z)/22:5(7Z,10Z,13Z,16Z,19Z))    | 853.10 | 5.86   |
| PC(20:5(5Z,8Z,11Z,14Z,17Z)/22:6(4Z,7Z,10Z,13Z,16Z,19Z)) | 851.89 | 40.80  |
| PC(21:0/22:1(11Z))                                      | 885.72 | 12.75  |
| PC(21:0/22:2(13Z,16Z))                                  | 883.61 | 0.63   |
| PC(21:0/22:4(7Z,10Z,13Z,16Z))                           | 879.30 | 20.88  |
| PC(21:0/22:6(4Z,7Z,10Z,13Z,16Z,19Z))                    | 875.03 | 15.91  |
| PC(22:0/22:4(7Z,10Z,13Z,16Z))                           | 893.08 | 37.16  |
| PC(22:0/22:6(4Z,7Z,10Z,13Z,16Z,19Z))                    | 889.30 | 5.26   |
| PC(22:1(11Z)/22:2(13Z,16Z))                             | 896.08 | 56.58  |
| PC(22:1(11Z)/22:4(7Z,10Z,13Z,16Z))                      | 891.39 | 7.79   |

|                                                             |        |       |
|-------------------------------------------------------------|--------|-------|
| PC(22:2(13Z,16Z)/0:0)                                       | 575.27 | 0.81  |
| PC(22:4(7Z,10Z,13Z,16Z)/22:6(4Z,7Z,10Z,13Z,16Z,19Z))        | 881.53 | 86.64 |
| PC(22:6(4Z,7Z,10Z,13Z,16Z,19Z)/0:0)                         | 566.67 | 2.37  |
| PC(22:6(4Z,7Z,10Z,13Z,16Z,19Z)/22:6(4Z,7Z,10Z,13Z,16Z,19Z)) | 878.12 | 29.24 |
| PC(23:0/18:0)                                               | 859.49 | 54.68 |
| PC(5:0/5:0)                                                 | 425.16 | 1.68  |
| PC(6:2(3E,5E)/14:2(11E,13E))                                | 558.18 | 11.18 |
| PC(O-10:1(9E)/2:0)                                          | 437.93 | 0.53  |
| PC(O-11:1(10E)/2:0)                                         | 452.20 | 8.29  |
| PC(O-12:0/2:0)                                              | 468.30 | 0.98  |
| PC(O-12:0/O-1:0)                                            | 439.35 | 3.89  |
| PC(O-14:0/2:0)                                              | 494.90 | 7.27  |
| PC(O-15:0/20:4(5Z,8Z,11Z,14Z))                              | 754.55 | 14.98 |
| PC(O-16:0/2:0)                                              | 522.87 | 7.52  |
| PC(O-16:1(11Z)/2:0)                                         | 522.20 | 5.10  |
| PC(O-8:0/2:0)                                               | 410.88 | 2.29  |
|                                                             | 400.76 | 3.80  |
|                                                             | 402.75 | 7.01  |
|                                                             | 403.91 | 8.05  |
|                                                             | 404.32 | 2.41  |
|                                                             | 406.42 | 1.75  |
|                                                             | 408.37 | 2.94  |
|                                                             | 412.38 | 15.57 |
|                                                             | 413.79 | 1.66  |
|                                                             | 414.32 | 6.79  |
|                                                             | 431.13 | 4.76  |
|                                                             | 433.35 | 42.64 |
|                                                             | 434.32 | 1.07  |
|                                                             | 444.07 | 0.63  |
|                                                             | 446.73 | 2.90  |
|                                                             | 449.49 | 3.41  |
|                                                             | 450.04 | 0.66  |
|                                                             | 450.22 | 2.48  |
|                                                             | 458.36 | 0.72  |
|                                                             | 461.65 | 1.66  |
|                                                             | 462.29 | 1.22  |
|                                                             | 468.92 | 1.75  |
|                                                             | 470.37 | 2.35  |
|                                                             | 475.95 | 30.59 |
|                                                             | 484.10 | 2.51  |
|                                                             | 484.42 | 1.63  |
|                                                             | 485.69 | 2.05  |
|                                                             | 490.29 | 0.86  |
|                                                             | 491.65 | 1.72  |
|                                                             | 491.95 | 0.74  |
|                                                             | 496.57 | 0.84  |
|                                                             | 498.27 | 25.71 |
|                                                             | 499.73 | 4.91  |
|                                                             | 500.09 | 4.20  |
|                                                             | 502.94 | 9.56  |
|                                                             | 503.96 | 4.32  |
|                                                             | 512.23 | 3.27  |
|                                                             | 513.45 | 2.80  |
|                                                             | 525.04 | 4.69  |
|                                                             | 525.38 | 14.22 |

|        |       |
|--------|-------|
| 527.03 | 3.33  |
| 529.22 | 18.34 |
| 533.70 | 5.11  |
| 538.50 | 3.01  |
| 538.64 | 25.45 |
| 540.18 | 3.39  |
| 554.54 | 8.65  |
| 558.50 | 1.17  |
| 559.78 | 2.40  |
| 582.79 | 1.67  |
| 585.37 | 3.31  |
| 586.76 | 4.31  |
| 587.47 | 27.87 |
| 588.73 | 4.38  |
| 597.37 | 11.67 |
| 598.77 | 0.72  |
| 600.92 | 1.43  |
| 605.51 | 1.06  |
| 612.56 | 3.89  |
| 614.24 | 1.24  |
| 614.41 | 1.57  |
| 618.28 | 2.14  |
| 618.40 | 2.93  |
| 618.55 | 3.25  |
| 620.03 | 3.71  |
| 620.22 | 5.12  |
| 620.23 | 8.26  |
| 623.78 | 5.37  |
| 625.23 | 0.51  |
| 627.08 | 3.92  |
| 628.13 | 7.11  |
| 630.01 | 2.49  |
| 637.85 | 8.65  |
| 639.86 | 0.97  |
| 640.43 | 15.87 |
| 641.69 | 20.70 |
| 641.95 | 2.81  |
| 643.94 | 7.35  |
| 644.20 | 8.05  |
| 653.09 | 26.24 |
| 653.85 | 36.77 |
| 654.29 | 2.23  |
| 655.52 | 15.77 |
| 659.27 | 6.28  |
| 667.66 | 44.84 |
| 671.36 | 10.55 |
| 671.53 | 5.08  |
| 679.58 | 19.41 |
| 680.92 | 13.55 |
| 682.97 | 1.72  |
| 684.02 | 1.33  |
| 685.21 | 5.04  |
| 685.42 | 22.03 |
| 685.51 | 1.55  |
| 693.09 | 8.51  |

|        |        |
|--------|--------|
| 694.22 | 17.08  |
| 694.24 | 13.46  |
| 706.97 | 28.98  |
| 708.94 | 51.48  |
| 720.91 | 2.86   |
| 722.43 | 56.69  |
| 735.51 | 5.69   |
| 810.59 | 115.35 |

---

**30 second exposure to 11 M NaOH**

|                                      |        |       |
|--------------------------------------|--------|-------|
| PC(13:0/13:0)                        | 650.00 | 4.78  |
| PC(10:0/18:0)                        | 677.54 | 1.64  |
| PC(10:0/18:1(9Z))                    | 676.37 | 0.79  |
| PC(10:0/19:0)                        | 691.00 | 0.78  |
| PC(10:0/20:0)                        | 706.05 | 8.78  |
| PC(10:0/22:0)                        | 733.78 | 5.56  |
| PC(10:0/23:0)                        | 747.12 | 11.69 |
| PC(10:0/25:0)                        | 775.15 | 3.04  |
| PC(10:0/4:0)                         | 481.09 | 3.31  |
| PC(11:0/11:0)                        | 593.48 | 2.15  |
| PC(12:0/12:0)                        | 621.61 | 1.46  |
| PC(12:0/13:0)                        | 635.63 | 0.47  |
| PC(12:0/15:1(9Z))                    | 662.29 | 2.10  |
| PC(12:0/17:2(9Z,12Z))                | 687.44 | 1.85  |
| PC(12:0/18:1(9Z))                    | 703.17 | 13.90 |
| PC(12:0/18:2(9Z,12Z))                | 701.55 | 1.43  |
| PC(12:0/18:3(6Z,9Z,12Z))             | 699.67 | 0.59  |
| PC(12:0/18:4(6Z,9Z,12Z,15Z))         | 697.04 | 1.31  |
| PC(12:0/22:6(4Z,7Z,10Z,13Z,16Z,19Z)) | 749.43 | 12.47 |
| PC(13:0/18:3(6Z,9Z,12Z))             | 714.30 | 8.02  |
| PC(13:0/18:4(6Z,9Z,12Z,15Z))         | 711.75 | 8.03  |
| PC(13:0/20:3(8Z,11Z,14Z))            | 741.71 | 5.99  |
| PC(13:0/20:4(5Z,8Z,11Z,14Z))         | 740.13 | 2.83  |
| PC(13:0/22:2(13Z,16Z))               | 771.88 | 5.06  |
| PC(13:0/22:6(4Z,7Z,10Z,13Z,16Z,19Z)) | 764.18 | 5.51  |
| PC(14:0/18:1(11Z))                   | 732.36 | 4.38  |
| PC(14:0/18:2(11Z,14Z))               | 729.45 | 2.94  |
| PC(14:0/18:3(9Z,12Z,15Z))            | 726.93 | 0.20  |
| PC(14:0/18:4(6Z,9Z,12Z,15Z))         | 726.33 | 5.08  |
| PC(14:0/2:0)                         | 509.47 | 0.57  |
| PC(14:0/20:5(5Z,8Z,11Z,14Z,17Z))     | 751.34 | 4.57  |
| PC(14:0/22:6(4Z,7Z,10Z,13Z,16Z,19Z)) | 777.11 | 7.45  |
| PC(14:0/24:1(15Z))                   | 815.67 | 11.93 |
| PC(14:0/26:0)                        | 845.42 | 3.54  |
| PC(14:1(9Z)/0:0)                     | 465.33 | 0.51  |
| PC(15:0/18:1(11Z))                   | 746.16 | 3.33  |
| PC(15:0/18:2(9Z,12Z))                | 743.05 | 2.78  |
| PC(15:0/20:5(5Z,8Z,11Z,14Z,17Z))     | 765.32 | 22.21 |
| PC(15:0/22:1(11Z))                   | 801.49 | 2.73  |
| PC(15:0/22:2(13Z,16Z))               | 799.69 | 0.94  |
| PC(15:0/22:6(4Z,7Z,10Z,13Z,16Z,19Z)) | 792.02 | 4.96  |
| PC(15:1(9Z)/0:0)                     | 479.51 | 0.37  |
| PC(15:1(9Z)/22:2(13Z,16Z))           | 797.88 | 1.64  |
| PC(16:0/15:1(14))                    | 717.61 | 2.73  |
| PC(16:0/18:1(9Z))                    | 759.41 | 6.75  |
| PC(16:0/18:2(10E,12Z))               | 756.86 | 2.79  |

|                                                         |        |       |
|---------------------------------------------------------|--------|-------|
| PC(16:0/18:3(6Z,9Z,12Z))                                | 755.15 | 4.18  |
| PC(16:0/2:0)                                            | 537.31 | 0.56  |
| PC(16:0/20:3(5Z,8Z,11Z))                                | 783.40 | 0.11  |
| PC(16:0/20:5(5Z,8Z,11Z,14Z,17Z))                        | 779.92 | 1.16  |
| PC(16:0/22:4(7Z,10Z,13Z,16Z))                           | 810.57 | 1.87  |
| PC(16:0/22:5(4Z,7Z,10Z,13Z,16Z))                        | 807.40 | 5.22  |
| PC(16:0/22:6(4E,7E,10E,13E,16E,19E))                    | 806.18 | 1.97  |
| PC(16:0/24:1(15Z))                                      | 843.61 | 1.13  |
| PC(16:0/26:2(5Z,9Z))                                    | 869.59 | 1.24  |
| PC(16:0/3:0)                                            | 551.56 | 0.52  |
| PC(16:0/3:1(2E))                                        | 549.61 | 0.15  |
| PC(16:0/5:0(COOH))                                      | 608.96 | 0.89  |
| PC(16:0/5:0)                                            | 579.89 | 0.45  |
| PC(16:0/5:1(4E))                                        | 577.56 | 0.43  |
| PC(16:0/9:0(COOH))                                      | 664.55 | 0.60  |
| PC(16:1(9E)/0:0)                                        | 493.60 | 0.42  |
| PC(16:1(9Z)/2:0)                                        | 535.54 | 0.23  |
| PC(16:1(9Z)/22:6(4Z,7Z,10Z,13Z,16Z,19Z))                | 803.93 | 5.07  |
| PC(17:0/10:0)                                           | 663.44 | 0.45  |
| PC(17:0/18:1(9Z))                                       | 773.80 | 1.67  |
| PC(17:0/22:2(13Z,16Z))                                  | 828.06 | 4.77  |
| PC(17:0/22:4(7Z,10Z,13Z,16Z))                           | 823.82 | 2.38  |
| PC(17:1(10Z)/0:0)                                       | 506.81 | 0.36  |
| PC(17:1(9Z)/22:2(13Z,16Z))                              | 825.93 | 12.25 |
| PC(17:2(9Z,12Z)/0:0)                                    | 505.59 | 1.64  |
| PC(18:0/11:1(10E))                                      | 689.06 | 0.87  |
| PC(18:0/18:0)                                           | 790.04 | 6.56  |
| PC(18:0/18:1(11Z))                                      | 787.74 | 1.95  |
| PC(18:0/18:2(10Z,12Z))                                  | 785.24 | 1.39  |
| PC(18:0/20:2(11Z,14Z))                                  | 813.08 | 2.31  |
| PC(18:0/20:3(5Z,11Z,14Z))                               | 811.47 | 4.01  |
| PC(18:0/22:4(7Z,10Z,13Z,16Z))                           | 838.18 | 2.80  |
| PC(18:0/22:5(4Z,7Z,10Z,13Z,16Z))                        | 835.42 | 6.53  |
| PC(18:2(2E,4E)/0:0)                                     | 519.10 | 0.94  |
| PC(18:2(9Z,12E)/17:2(9Z,11E))                           | 768.26 | 5.88  |
| PC(18:2(9Z,12Z)/22:6(4Z,7Z,10Z,13Z,16Z,19Z))            | 829.15 | 3.12  |
| PC(18:4(9E,11E,13E,15E)/0:0)                            | 515.16 | 0.63  |
| PC(19:0/22:1(11Z))                                      | 857.01 | 2.06  |
| PC(19:0/22:2(13Z,16Z))                                  | 856.28 | 5.97  |
| PC(19:0/22:6(4Z,7Z,10Z,13Z,16Z,19Z))                    | 847.46 | 1.23  |
| PC(19:1(9Z)/22:4(7Z,10Z,13Z,16Z))                       | 850.30 | 1.71  |
| PC(19:3(10Z,13Z,16Z)/0:0)                               | 530.62 | 0.97  |
| PC(20:0/20:2(11Z,14Z))                                  | 842.57 | 1.03  |
| PC(20:0/22:5(7Z,10Z,13Z,16Z,19Z))                       | 863.36 | 0.13  |
| PC(20:0/22:6(4Z,7Z,10Z,13Z,16Z,19Z))                    | 861.39 | 5.96  |
| PC(20:0/24:1(15Z))                                      | 899.48 | 1.59  |
| PC(20:1(11Z)/22:2(13Z,16Z))                             | 867.74 | 4.72  |
| PC(20:3(8Z,11Z,14Z)/0:0)                                | 544.53 | 0.56  |
| PC(20:4(5Z,8Z,11Z,14Z)/0:0)                             | 543.94 | 0.46  |
| PC(20:5(5Z,8Z,11Z,14Z,17Z)/0:0)                         | 541.35 | 2.65  |
| PC(20:5(5Z,8Z,11Z,14Z,17Z)/22:5(7Z,10Z,13Z,16Z,19Z))    | 853.07 | 3.08  |
| PC(20:5(5Z,8Z,11Z,14Z,17Z)/22:6(4Z,7Z,10Z,13Z,16Z,19Z)) | 851.83 | 3.67  |
| PC(21:0/22:1(11Z))                                      | 885.93 | 7.42  |
| PC(21:0/22:2(13Z,16Z))                                  | 883.02 | 1.60  |
| PC(21:0/22:6(4Z,7Z,10Z,13Z,16Z,19Z))                    | 875.65 | 1.68  |

|                                                             |        |      |
|-------------------------------------------------------------|--------|------|
| PC(22:0/22:6(4Z,7Z,10Z,13Z,16Z,19Z))                        | 890.03 | 0.48 |
| PC(22:1(11Z)/22:2(13Z,16Z))                                 | 895.54 | 2.35 |
| PC(22:1(11Z)/22:4(7Z,10Z,13Z,16Z))                          | 891.52 | 2.40 |
| PC(22:2(13Z,16Z)/0:0)                                       | 575.50 | 0.19 |
| PC(22:4(7Z,10Z,13Z,16Z)/0:0)                                | 571.56 | 0.73 |
| PC(22:4(7Z,10Z,13Z,16Z)/22:6(4Z,7Z,10Z,13Z,16Z,19Z))        | 881.88 | 4.88 |
| PC(22:6(4Z,7Z,10Z,13Z,16Z,19Z)/0:0)                         | 567.30 | 0.59 |
| PC(22:6(4Z,7Z,10Z,13Z,16Z,19Z)/22:6(4Z,7Z,10Z,13Z,16Z,19Z)) | 876.88 | 0.71 |
| PC(23:0/18:0)                                               | 860.14 | 2.57 |
| PC(24:0/0:0)                                                | 606.63 | 0.95 |
| PC(25:0/18:0)                                               | 886.99 | 0.49 |
| PC(5:0/5:0)                                                 | 424.64 | 0.46 |
| PC(6:0/6:0)                                                 | 453.44 | 0.11 |
| PC(6:2(2E,4E)/6:2(2E,4E))                                   | 444.76 | 1.05 |
| PC(6:2(3E,5E)/14:2(11E,13E))                                | 556.75 | 1.58 |
| PC(8:2(2E,4E)/8:2(2E,4E))                                   | 501.32 | 0.56 |
| PC(O-10:1(9E)/2:0)                                          | 437.21 | 0.54 |
| PC(O-11:1(10E)/2:0)                                         | 451.68 | 1.81 |
| PC(O-12:0/2:0)                                              | 467.74 | 0.11 |
| PC(O-16:0/2:0)                                              | 524.28 | 0.06 |
| PC(O-16:1(11Z)/2:0)                                         | 521.39 | 0.20 |
| PC(O-17:0/18:1(9Z))                                         | 760.59 | 2.71 |
| PC(O-18:2(9Z,12Z)/2:0)                                      | 546.44 | 1.39 |
| PC(O-8:0/2:0)                                               | 410.83 | 0.25 |
|                                                             | 401.58 | 0.18 |
|                                                             | 402.80 | 0.57 |
|                                                             | 403.50 | 0.11 |
|                                                             | 404.96 | 0.51 |
|                                                             | 407.32 | 0.77 |
|                                                             | 408.25 | 0.36 |
|                                                             | 413.78 | 0.19 |
|                                                             | 413.84 | 0.96 |
|                                                             | 413.90 | 0.14 |
|                                                             | 415.69 | 0.53 |
|                                                             | 417.50 | 0.08 |
|                                                             | 417.55 | 0.11 |
|                                                             | 419.03 | 0.15 |
|                                                             | 420.09 | 0.63 |
|                                                             | 421.16 | 0.28 |
|                                                             | 421.68 | 0.09 |
|                                                             | 426.69 | 0.50 |
|                                                             | 427.26 | 0.34 |
|                                                             | 427.64 | 0.26 |
|                                                             | 432.11 | 1.13 |
|                                                             | 434.06 | 0.32 |
|                                                             | 435.91 | 0.84 |
|                                                             | 440.62 | 0.25 |
|                                                             | 442.01 | 0.29 |
|                                                             | 447.86 | 0.09 |
|                                                             | 449.55 | 0.83 |
|                                                             | 455.10 | 0.15 |
|                                                             | 456.44 | 0.34 |
|                                                             | 457.29 | 0.44 |
|                                                             | 457.59 | 0.62 |
|                                                             | 460.13 | 0.96 |



|        |      |
|--------|------|
| 461.07 | 0.64 |
| 462.59 | 0.16 |
| 471.44 | 0.16 |
| 471.96 | 0.63 |
| 473.54 | 0.26 |
| 474.08 | 1.19 |
| 474.23 | 3.15 |
| 486.32 | 0.52 |
| 486.95 | 0.54 |
| 488.27 | 0.10 |
| 492.15 | 0.43 |
| 492.24 | 1.84 |
| 497.14 | 0.34 |
| 497.18 | 0.30 |
| 497.19 | 0.23 |
| 498.32 | 0.46 |
| 498.89 | 0.44 |
| 502.33 | 0.88 |
| 524.75 | 0.94 |
| 527.23 | 0.64 |
| 528.98 | 0.22 |
| 529.05 | 2.79 |
| 530.26 | 3.55 |
| 539.69 | 0.36 |
| 552.52 | 0.70 |
| 552.87 | 0.21 |
| 553.32 | 0.76 |
| 554.82 | 1.65 |
| 559.69 | 1.01 |
| 561.02 | 2.57 |
| 569.34 | 0.14 |
| 580.96 | 1.23 |
| 582.91 | 0.53 |
| 584.83 | 0.63 |
| 585.13 | 1.23 |
| 588.06 | 0.27 |
| 588.97 | 0.05 |
| 589.37 | 0.27 |
| 589.78 | 0.85 |
| 590.28 | 0.92 |
| 595.15 | 0.08 |
| 598.53 | 0.54 |
| 598.63 | 0.78 |
| 600.41 | 0.27 |
| 602.38 | 0.28 |
| 602.49 | 0.38 |
| 605.42 | 0.84 |
| 605.76 | 0.41 |
| 611.13 | 0.07 |
| 612.13 | 0.97 |
| 612.32 | 0.13 |
| 615.12 | 0.92 |
| 616.22 | 3.54 |
| 618.25 | 0.51 |
| 622.73 | 0.29 |

|        |      |
|--------|------|
| 624.31 | 1.33 |
| 625.39 | 0.30 |
| 628.92 | 0.98 |
| 629.02 | 0.18 |
| 632.84 | 1.08 |
| 632.86 | 3.44 |
| 636.57 | 0.31 |
| 637.72 | 0.62 |
| 638.26 | 1.25 |
| 641.42 | 2.43 |
| 643.68 | 5.00 |
| 645.09 | 0.56 |
| 645.33 | 0.85 |
| 655.26 | 2.12 |
| 656.16 | 0.54 |
| 657.41 | 0.75 |
| 657.64 | 3.49 |
| 659.96 | 0.93 |
| 668.78 | 0.69 |
| 669.63 | 2.36 |
| 670.53 | 1.25 |
| 671.76 | 0.79 |
| 672.15 | 0.37 |
| 679.64 | 1.31 |
| 683.50 | 1.04 |
| 683.99 | 1.54 |
| 684.53 | 0.30 |
| 685.57 | 0.20 |
| 686.28 | 0.34 |
| 694.19 | 0.88 |
| 695.63 | 0.18 |
| 720.80 | 3.80 |
| 752.53 | 2.25 |

---

**12 min exposure to 11 M NaOH**

|                                  |        |       |
|----------------------------------|--------|-------|
| PC(10:0/10:0)                    | 565.90 | 3.40  |
| PC(13:0/13:0)                    | 650.00 | 6.18  |
| PC(10:0/18:0)                    | 677.55 | 6.31  |
| PC(10:0/18:2(9Z,12Z))            | 672.56 | 1.02  |
| PC(10:0/19:0)                    | 691.41 | 12.37 |
| PC(10:0/20:0)                    | 705.65 | 43.40 |
| PC(10:0/21:0)                    | 719.75 | 17.42 |
| PC(10:0/22:0)                    | 733.03 | 77.75 |
| PC(10:0/23:0)                    | 747.95 | 2.94  |
| PC(10:0/24:0)                    | 761.86 | 51.73 |
| PC(10:0/25:0)                    | 776.11 | 15.21 |
| PC(11:0/11:0)                    | 593.62 | 3.89  |
| PC(12:0/12:0)                    | 621.37 | 3.08  |
| PC(12:0/14:1(9Z))                | 647.81 | 3.07  |
| PC(12:0/15:1(9Z))                | 661.98 | 16.82 |
| PC(12:0/17:2(9Z,12Z))            | 687.29 | 3.33  |
| PC(12:0/18:1(9Z))                | 702.71 | 14.21 |
| PC(12:0/18:2(9Z,12Z))            | 701.54 | 74.76 |
| PC(12:0/18:3(6Z,9Z,12Z))         | 699.14 | 12.93 |
| PC(12:0/18:4(6Z,9Z,12Z,15Z))     | 696.82 | 58.74 |
| PC(12:0/20:5(5Z,8Z,11Z,14Z,17Z)) | 723.22 | 14.82 |

|                                          |        |       |
|------------------------------------------|--------|-------|
| PC(12:0/22:6(4Z,7Z,10Z,13Z,16Z,19Z))     | 749.40 | 18.47 |
| PC(12:0/26:0)                            | 817.89 | 91.19 |
| PC(13:0/13:0)                            | 651.11 | 20.70 |
| PC(13:0/18:2(9Z,12Z))                    | 715.92 | 5.15  |
| PC(13:0/18:3(6Z,9Z,12Z))                 | 713.61 | 3.87  |
| PC(13:0/18:4(6Z,9Z,12Z,15Z))             | 711.42 | 38.86 |
| PC(13:0/20:4(5Z,8Z,11Z,14Z))             | 739.65 | 41.89 |
| PC(13:0/20:5(5Z,8Z,11Z,14Z,17Z))         | 737.56 | 2.24  |
| PC(13:0/22:6(4Z,7Z,10Z,13Z,16Z,19Z))     | 763.14 | 3.92  |
| PC(14:0/18:2(11Z,14Z))                   | 729.63 | 5.06  |
| PC(14:0/18:3(9Z,12Z,15Z))                | 728.44 | 10.22 |
| PC(14:0/18:4(6Z,9Z,12Z,15Z))             | 0.00   | 8.16  |
| PC(14:0/20:5(5Z,8Z,11Z,14Z,17Z))         | 751.70 | 22.89 |
| PC(14:0/22:6(4Z,7Z,10Z,13Z,16Z,19Z))     | 777.87 | 17.78 |
| PC(14:0/24:1(15Z))                       | 815.18 | 12.63 |
| PC(14:0/26:0)                            | 845.32 | 7.15  |
| PC(14:1(9Z)/0:0)                         | 465.05 | 5.53  |
| PC(15:0/18:1(11Z))                       | 745.15 | 39.04 |
| PC(15:0/18:2(9Z,12Z))                    | 744.33 | 2.28  |
| PC(15:0/20:3(8Z,11Z,14Z))                | 769.11 | 16.04 |
| PC(15:0/20:5(5Z,8Z,11Z,14Z,17Z))         | 765.91 | 5.59  |
| PC(15:0/22:1(11Z))                       | 801.37 | 14.85 |
| PC(15:0/22:1(11Z))                       | 800.77 | 17.92 |
| PC(15:0/22:6(4Z,7Z,10Z,13Z,16Z,19Z))     | 791.75 | 11.70 |
| PC(15:1(9Z)/22:2(13Z,16Z))               | 797.06 | 11.49 |
| PC(16:0/15:1(14))                        | 717.91 | 11.41 |
| PC(16:0/18:1(9Z))                        | 759.82 | 39.16 |
| PC(16:0/18:2(10E,12Z))                   | 757.72 | 0.54  |
| PC(16:0/18:3(6Z,9Z,12Z))                 | 754.91 | 19.76 |
| PC(16:0/20:3(5Z,8Z,11Z))                 | 784.24 | 31.17 |
| PC(16:0/20:4(5Z,8Z,11Z,14Z))             | 782.39 | 11.38 |
| PC(16:0/20:5(5Z,8Z,11Z,14Z,17Z))         | 779.51 | 1.79  |
| PC(16:0/22:4(7Z,10Z,13Z,16Z))            | 808.90 | 2.59  |
| PC(16:0/22:5(4Z,7Z,10Z,13Z,16Z))         | 807.56 | 33.97 |
| PC(16:0/23:5(8E,11E,14E,17E,20E))        | 821.01 | 34.61 |
| PC(16:0/24:1(15Z))                       | 843.46 | 0.76  |
| PC(16:0/26:0)                            | 873.96 | 4.45  |
| PC(16:0/26:2(5Z,9Z))                     | 869.97 | 18.82 |
| PC(16:0/3:1(2E))                         | 549.37 | 6.46  |
| PC(16:0/5:0(COOH))                       | 609.67 | 5.68  |
| PC(16:0/5:1(4E))                         | 577.08 | 1.17  |
| PC(16:1(9E)/0:0)                         | 493.35 | 4.26  |
| PC(16:1(9Z)/2:0)                         | 535.91 | 4.88  |
| PC(16:1(9Z)/22:6(4Z,7Z,10Z,13Z,16Z,19Z)) | 803.15 | 41.59 |
| PC(17:0/10:0)                            | 662.77 | 0.98  |
| PC(17:0/20:4(5Z,8Z,11Z,14Z))             | 795.73 | 18.91 |
| PC(17:0/22:4(7Z,10Z,13Z,16Z))            | 823.18 | 12.20 |
| PC(17:0/22:6(4Z,7Z,10Z,13Z,16Z,19Z))     | 819.59 | 16.18 |
| PC(17:1(10Z)/0:0)                        | 507.11 | 3.87  |
| PC(17:1(9Z)/22:2(13Z,16Z))               | 826.03 | 62.21 |
| PC(17:2(9Z,12Z)/0:0)                     | 505.48 | 1.12  |
| PC(18:0/11:1(10E))                       | 689.07 | 6.84  |
| PC(18:0/18:0)                            | 789.65 | 7.96  |
| PC(18:0/18:1(11Z))                       | 787.78 | 19.04 |
| PC(18:0/18:2(10Z,12Z))                   | 786.53 | 25.46 |

|                                                             |        |       |
|-------------------------------------------------------------|--------|-------|
| PC(18:0/20:3(5Z,11Z,14Z))                                   | 811.61 | 10.70 |
| PC(18:0/22:3(10Z,13Z,16Z))                                  | 840.45 | 3.56  |
| PC(18:0/22:4(7Z,10Z,13Z,16Z))                               | 837.42 | 7.42  |
| PC(18:0/22:5(4Z,7Z,10Z,13Z,16Z))                            | 835.43 | 13.20 |
| PC(18:0/22:6(4Z,7Z,10Z,13Z,16Z,19Z))                        | 833.79 | 16.73 |
| PC(18:1(11Z)/22:6(4Z,7Z,10Z,13Z,16Z,19Z))                   | 831.98 | 11.95 |
| PC(18:1(9E)/2:0)                                            | 562.77 | 4.41  |
| PC(18:2(9Z,12E)/17:2(9Z,11E))                               | 767.31 | 9.44  |
| PC(18:2(9Z,12E)/17:2(9Z,11E))                               | 767.90 | 14.96 |
| PC(18:2(9Z,12Z)/22:6(4Z,7Z,10Z,13Z,16Z,19Z))                | 830.10 | 1.98  |
| PC(18:3(9Z,12Z,15Z)/0:0)                                    | 516.83 | 0.93  |
| PC(18:4(9E,11E,13E,15E)/18:4(9E,11E,13E,15E))               | 772.55 | 45.07 |
| PC(19:0/22:1(11Z))                                          | 857.64 | 17.37 |
| PC(19:0/22:2(13Z,16Z))                                      | 855.75 | 32.92 |
| PC(19:0/22:6(4Z,7Z,10Z,13Z,16Z,19Z))                        | 847.98 | 7.10  |
| PC(19:3(10Z,13Z,16Z)/0:0)                                   | 530.87 | 3.70  |
| PC(20:0/20:2(11Z,14Z))                                      | 842.25 | 67.02 |
| PC(20:0/22:6(4Z,7Z,10Z,13Z,16Z,19Z))                        | 861.71 | 3.16  |
| PC(20:1(11Z)/22:2(13Z,16Z))                                 | 867.89 | 10.79 |
| PC(20:3(8Z,11Z,14Z)/0:0)                                    | 546.32 | 4.81  |
| PC(20:4(5Z,8Z,11Z,14Z)/0:0)                                 | 542.43 | 2.10  |
| PC(20:5(5Z,8Z,11Z,14Z,17Z)/0:0)                             | 542.07 | 3.98  |
| PC(20:5(5Z,8Z,11Z,14Z,17Z)/22:5(7Z,10Z,13Z,16Z,19Z))        | 854.48 | 54.78 |
| PC(20:5(5Z,8Z,11Z,14Z,17Z)/22:6(4Z,7Z,10Z,13Z,16Z,19Z))     | 851.25 | 12.83 |
| PC(21:0/22:2(13Z,16Z))                                      | 882.92 | 24.71 |
| PC(21:0/22:4(7Z,10Z,13Z,16Z))                               | 879.02 | 6.42  |
| PC(21:0/22:6(4Z,7Z,10Z,13Z,16Z,19Z))                        | 875.46 | 8.08  |
| PC(22:0/22:4(7Z,10Z,13Z,16Z))                               | 893.66 | 1.22  |
| PC(22:0/22:6(4Z,7Z,10Z,13Z,16Z,19Z))                        | 889.27 | 3.87  |
| PC(22:1(11Z)/22:2(13Z,16Z))                                 | 895.13 | 12.15 |
| PC(22:1(11Z)/22:4(7Z,10Z,13Z,16Z))                          | 891.87 | 4.36  |
| PC(22:1(13E)/22:1(13E))                                     | 897.23 | 27.51 |
| PC(22:2(13Z,16Z)/0:0)                                       | 575.11 | 1.57  |
| PC(22:6(4Z,7Z,10Z,13Z,16Z,19Z)/0:0)                         | 567.13 | 4.09  |
| PC(22:6(4Z,7Z,10Z,13Z,16Z,19Z)/22:6(4Z,7Z,10Z,13Z,16Z,19Z)) | 877.70 | 16.78 |
| PC(23:0/18:0)                                               | 860.43 | 58.82 |
| PC(25:0/18:0)                                               | 888.28 | 4.77  |
| PC(6:0/6:0)                                                 | 453.50 | 1.29  |
| PC(6:2(3E,5E)/14:2(11E,13E))                                | 558.08 | 4.51  |
| PC(O-12:0/O-1:0)                                            | 438.42 | 2.38  |
| PC(O-14:0/2:0)                                              | 495.08 | 0.85  |
| PC(O-16:0/2:0)                                              | 523.07 | 64.56 |
| PC(O-16:0/20:5(5Z,8Z,11Z,14Z,17Z))                          | 766.54 | 2.71  |
| PC(O-16:1(11Z)/2:0)                                         | 521.07 | 13.60 |
| PC(O-18:0/22:5(4Z,7Z,10Z,13Z,16Z))                          | 822.60 | 11.59 |
| PC(O-18:2(9Z,12Z)/2:0)                                      | 546.78 | 3.10  |
|                                                             | 403.01 | 4.11  |
|                                                             | 404.61 | 4.19  |
|                                                             | 405.56 | 15.61 |
|                                                             | 406.97 | 23.34 |
|                                                             | 412.93 | 6.48  |
|                                                             | 419.42 | 0.58  |
|                                                             | 420.57 | 12.53 |
|                                                             | 423.38 | 11.39 |
|                                                             | 427.45 | 39.36 |

|        |       |
|--------|-------|
| 428.32 | 3.80  |
| 429.65 | 1.11  |
| 432.69 | 1.43  |
| 434.95 | 2.09  |
| 440.81 | 17.87 |
| 454.76 | 11.17 |
| 454.96 | 0.24  |
| 459.91 | 1.37  |
| 463.13 | 0.95  |
| 472.13 | 3.77  |
| 472.28 | 4.61  |
| 473.14 | 1.87  |
| 475.18 | 7.02  |
| 477.30 | 1.22  |
| 483.12 | 2.89  |
| 483.12 | 9.11  |
| 483.94 | 3.13  |
| 487.09 | 4.99  |
| 497.28 | 3.47  |
| 497.90 | 6.04  |
| 499.23 | 0.77  |
| 510.58 | 1.01  |
| 512.86 | 2.12  |
| 527.49 | 9.01  |
| 532.82 | 1.98  |
| 540.22 | 0.86  |
| 554.51 | 2.43  |
| 560.70 | 45.98 |
| 573.84 | 3.86  |
| 581.74 | 1.09  |
| 583.75 | 11.15 |
| 583.96 | 2.31  |
| 584.91 | 3.13  |
| 597.18 | 1.68  |
| 599.13 | 2.66  |
| 600.67 | 1.79  |
| 601.52 | 1.75  |
| 604.46 | 0.60  |
| 605.98 | 11.32 |
| 610.42 | 3.23  |
| 612.05 | 5.70  |
| 612.71 | 17.52 |
| 615.73 | 1.76  |
| 616.30 | 12.59 |
| 622.71 | 9.52  |
| 623.16 | 14.37 |
| 626.03 | 1.36  |
| 626.30 | 1.57  |
| 630.63 | 1.38  |
| 638.49 | 11.11 |
| 640.76 | 10.93 |
| 642.46 | 1.78  |
| 652.39 | 15.55 |
| 652.73 | 37.08 |
| 656.70 | 3.04  |

|        |       |
|--------|-------|
| 658.36 | 5.08  |
| 659.98 | 11.18 |
| 667.02 | 35.07 |
| 667.47 | 10.21 |
| 667.94 | 1.97  |
| 670.16 | 6.82  |
| 672.10 | 0.96  |
| 679.03 | 5.32  |
| 679.53 | 2.88  |
| 682.27 | 4.41  |
| 683.96 | 1.51  |
| 685.55 | 14.48 |
| 695.73 | 5.28  |

---

**30 min exposure to 11 M NaOH**

|                                      |        |       |
|--------------------------------------|--------|-------|
| PC(10:0/10:0)                        | 565.27 | 7.12  |
| PC(13:0/13:0)                        | 650.00 | 12.49 |
| PC(10:0/18:2(9Z,12Z))                | 674.10 | 12.58 |
| PC(10:0/19:0)                        | 691.60 | 1.21  |
| PC(10:0/20:0)                        | 705.78 | 59.32 |
| PC(10:0/22:0)                        | 733.22 | 58.80 |
| PC(10:0/25:0)                        | 774.85 | 3.91  |
| PC(10:0/4:0)                         | 480.91 | 4.19  |
| PC(11:0/11:0)                        | 593.26 | 3.98  |
| PC(12:0/12:0)                        | 621.06 | 7.38  |
| PC(12:0/13:0)                        | 635.13 | 11.28 |
| PC(12:0/14:1(9Z))                    | 646.98 | 7.13  |
| PC(12:0/15:1(9Z))                    | 661.15 | 10.29 |
| PC(12:0/17:2(9Z,12Z))                | 688.29 | 6.25  |
| PC(12:0/18:1(9Z))                    | 703.31 | 8.62  |
| PC(12:0/18:2(9Z,12Z))                | 702.01 | 15.66 |
| PC(12:0/18:3(6Z,9Z,12Z))             | 699.80 | 8.44  |
| PC(12:0/18:4(6Z,9Z,12Z,15Z))         | 696.90 | 14.12 |
| PC(12:0/20:5(5Z,8Z,11Z,14Z,17Z))     | 723.20 | 37.65 |
| PC(12:0/22:6(4Z,7Z,10Z,13Z,16Z,19Z)) | 749.20 | 17.39 |
| PC(12:0/26:0)                        | 816.88 | 34.56 |
| PC(13:0/13:0)                        | 650.91 | 15.87 |
| PC(13:0/18:2(9Z,12Z))                | 715.27 | 13.25 |
| PC(13:0/20:3(8Z,11Z,14Z))            | 741.54 | 11.85 |
| PC(13:0/20:5(5Z,8Z,11Z,14Z,17Z))     | 737.66 | 28.14 |
| PC(14:0/18:1(11Z))                   | 730.85 | 7.91  |
| PC(14:0/18:2(11Z,14Z))               | 730.41 | 13.16 |
| PC(14:0/18:4(6Z,9Z,12Z,15Z))         | 725.96 | 4.85  |
| PC(14:0/2:0)                         | 510.03 | 0.87  |
| PC(14:0/20:4(5Z,8Z,11Z,14Z))         | 753.60 | 4.52  |
| PC(14:0/20:5(5Z,8Z,11Z,14Z,17Z))     | 751.50 | 38.01 |
| PC(14:0/24:1(15Z))                   | 815.13 | 47.25 |
| PC(14:1(9Z)/0:0)                     | 465.51 | 2.70  |
| PC(15:0/18:1(11Z))                   | 745.68 | 27.19 |
| PC(15:0/18:2(9Z,12Z))                | 743.62 | 0.73  |
| PC(15:0/20:3(8Z,11Z,14Z))            | 770.34 | 8.80  |
| PC(15:0/20:5(5Z,8Z,11Z,14Z,17Z))     | 765.36 | 5.18  |
| PC(15:0/22:1(11Z))                   | 801.52 | 12.34 |
| PC(15:0/22:2(13Z,16Z))               | 799.40 | 4.84  |
| PC(15:0/22:6(4Z,7Z,10Z,13Z,16Z,19Z)) | 791.17 | 14.95 |
| PC(15:1(9Z)/22:2(13Z,16Z))           | 797.63 | 6.31  |

|                                                         |        |       |
|---------------------------------------------------------|--------|-------|
| PC(16:0/15:1(14))                                       | 717.89 | 19.51 |
| PC(16:0/18:1(9Z))                                       | 759.29 | 10.68 |
| PC(16:0/18:2(10E,12Z))                                  | 757.17 | 19.21 |
| PC(16:0/18:3(6Z,9Z,12Z))                                | 755.55 | 9.30  |
| PC(16:0/2:0)                                            | 537.65 | 7.64  |
| PC(16:0/20:4(5Z,8Z,11Z,14Z))                            | 781.27 | 7.81  |
| PC(16:0/20:5(5Z,8Z,11Z,14Z,17Z))                        | 779.55 | 1.42  |
| PC(16:0/22:5(4Z,7Z,10Z,13Z,16Z))                        | 808.56 | 8.62  |
| PC(16:0/23:5(8E,11E,14E,17E,20E))                       | 822.00 | 53.64 |
| PC(16:0/24:1(15Z))                                      | 843.41 | 34.68 |
| PC(16:0/26:0)                                           | 874.53 | 1.09  |
| PC(16:0/26:2(5Z,9Z))                                    | 870.44 | 0.30  |
| PC(16:0/3:0)                                            | 551.62 | 0.98  |
| PC(16:0/3:1(2E))                                        | 548.70 | 5.43  |
| PC(16:0/5:0)                                            | 579.07 | 1.62  |
| PC(16:1(9E)/0:0)                                        | 493.23 | 2.20  |
| PC(16:1(9Z)/22:6(4Z,7Z,10Z,13Z,16Z,19Z))                | 803.99 | 7.56  |
| PC(17:0/10:0)                                           | 663.52 | 54.16 |
| PC(17:0/18:1(9Z))                                       | 772.67 | 23.44 |
| PC(17:0/20:4(5Z,8Z,11Z,14Z))                            | 795.56 | 10.53 |
| PC(17:0/22:2(13Z,16Z))                                  | 827.95 | 0.54  |
| PC(17:0/22:6(4Z,7Z,10Z,13Z,16Z,19Z))                    | 819.00 | 12.59 |
| PC(17:1(9Z)/22:2(13Z,16Z))                              | 826.15 | 3.48  |
| PC(17:2(9Z,12Z)/0:0)                                    | 506.11 | 40.94 |
| PC(18:0/11:1(10E))                                      | 689.49 | 3.09  |
| PC(18:0/18:0)                                           | 789.15 | 14.42 |
| PC(18:0/18:1(11Z))                                      | 787.42 | 7.13  |
| PC(18:0/18:2(10Z,12Z))                                  | 785.97 | 4.66  |
| PC(18:0/20:3(5Z,11Z,14Z))                               | 811.68 | 22.39 |
| PC(18:0/22:3(10Z,13Z,16Z))                              | 840.38 | 3.59  |
| PC(18:0/22:5(4Z,7Z,10Z,13Z,16Z))                        | 835.43 | 2.95  |
| PC(18:0/22:6(4Z,7Z,10Z,13Z,16Z,19Z))                    | 833.57 | 10.95 |
| PC(18:0/24:1(15Z))                                      | 871.63 | 11.25 |
| PC(18:1(9E)/2:0)                                        | 563.77 | 0.43  |
| PC(18:1(9Z)/4:0)                                        | 590.85 | 3.46  |
| PC(18:2(2E,4E)/0:0)                                     | 518.71 | 0.53  |
| PC(18:2(9Z,12E)/17:2(9Z,11E))                           | 767.56 | 12.73 |
| PC(18:3(9Z,12Z,15Z)/0:0)                                | 517.05 | 1.30  |
| PC(18:4(9E,11E,13E,15E)/0:0)                            | 515.21 | 4.11  |
| PC(19:0/22:1(11Z))                                      | 857.96 | 1.99  |
| PC(19:0/22:2(13Z,16Z))                                  | 856.25 | 8.17  |
| PC(19:0/22:6(4Z,7Z,10Z,13Z,16Z,19Z))                    | 847.93 | 29.38 |
| PC(19:1(9Z)/22:4(7Z,10Z,13Z,16Z))                       | 849.97 | 2.22  |
| PC(20:0/20:2(11Z,14Z))                                  | 841.92 | 4.39  |
| PC(20:0/22:4(7Z,10Z,13Z,16Z))                           | 864.83 | 2.86  |
| PC(20:0/22:6(4Z,7Z,10Z,13Z,16Z,19Z))                    | 860.95 | 14.98 |
| PC(20:0/24:1(15Z))                                      | 899.19 | 5.13  |
| PC(20:1(11Z)/22:2(13Z,16Z))                             | 867.98 | 2.89  |
| PC(20:3(8Z,11Z,14Z)/0:0)                                | 545.26 | 1.35  |
| PC(20:5(5Z,8Z,11Z,14Z,17Z)/0:0)                         | 541.98 | 4.63  |
| PC(20:5(5Z,8Z,11Z,14Z,17Z)/22:6(4Z,7Z,10Z,13Z,16Z,19Z)) | 851.57 | 22.55 |
| PC(21:0/22:1(11Z))                                      | 885.28 | 10.89 |
| PC(21:0/22:2(13Z,16Z))                                  | 883.00 | 5.45  |
| PC(21:0/22:4(7Z,10Z,13Z,16Z))                           | 879.15 | 0.47  |
| PC(21:0/22:6(4Z,7Z,10Z,13Z,16Z,19Z))                    | 875.47 | 0.88  |

|                                                             |        |       |
|-------------------------------------------------------------|--------|-------|
| PC(22:0/22:4(7Z,10Z,13Z,16Z))                               | 894.26 | 0.73  |
| PC(22:0/22:6(4Z,7Z,10Z,13Z,16Z,19Z))                        | 890.16 | 4.25  |
| PC(22:1(11Z)/22:2(13Z,16Z))                                 | 895.86 | 9.16  |
| PC(22:1(11Z)/22:4(7Z,10Z,13Z,16Z))                          | 891.68 | 6.24  |
| PC(22:1(13E)/22:1(13E))                                     | 898.03 | 8.17  |
| PC(22:2(13Z,16Z)/0:0)                                       | 575.59 | 3.87  |
| PC(22:4(7Z,10Z,13Z,16Z)/0:0)                                | 571.62 | 1.18  |
| PC(22:4(7Z,10Z,13Z,16Z)/22:6(4Z,7Z,10Z,13Z,16Z,19Z))        | 880.89 | 2.41  |
| PC(22:6(4Z,7Z,10Z,13Z,16Z,19Z)/22:6(4Z,7Z,10Z,13Z,16Z,19Z)) | 878.03 | 9.39  |
| PC(23:0/18:0)                                               | 859.49 | 31.15 |
| PC(24:0/0:0)                                                | 607.97 | 4.72  |
| PC(6:0/6:0)                                                 | 453.15 | 3.21  |
| PC(6:2(2E,4E)/6:2(2E,4E))                                   | 445.50 | 3.70  |
| PC(6:2(3E,5E)/14:2(11E,13E))                                | 557.76 | 1.99  |
| PC(8:2(2E,4E)/8:2(2E,4E))                                   | 500.97 | 1.82  |
| PC(O-10:1(9E)/2:0)                                          | 437.51 | 4.93  |
| PC(O-11:1(10E)/2:0)                                         | 451.75 | 5.07  |
| PC(O-12:0/2:0)                                              | 467.38 | 2.03  |
| PC(O-14:0/2:0)                                              | 495.75 | 7.77  |
| PC(O-14:0/O-1:0)                                            | 468.33 | 2.70  |
| PC(O-16:0/2:0)                                              | 522.39 | 1.40  |
| PC(O-16:1(11Z)/2:0)                                         | 521.82 | 2.27  |
| PC(O-18:2(9Z,12Z)/2:0)                                      | 548.30 | 5.51  |
| PC(O-8:0/2:0)                                               | 410.53 | 4.02  |
|                                                             | 401.82 | 0.37  |
|                                                             | 403.87 | 16.18 |
|                                                             | 404.66 | 3.86  |
|                                                             | 405.08 | 1.14  |
|                                                             | 409.88 | 1.62  |
|                                                             | 412.91 | 2.44  |
|                                                             | 414.78 | 6.94  |
|                                                             | 416.01 | 0.59  |
|                                                             | 418.17 | 0.99  |
|                                                             | 418.92 | 1.27  |
|                                                             | 419.13 | 3.57  |
|                                                             | 421.30 | 18.62 |
|                                                             | 421.59 | 3.43  |
|                                                             | 423.45 | 3.98  |
|                                                             | 427.53 | 1.26  |
|                                                             | 428.96 | 3.94  |
|                                                             | 429.24 | 0.80  |
|                                                             | 431.00 | 1.43  |
|                                                             | 431.05 | 43.26 |
|                                                             | 432.80 | 1.04  |
|                                                             | 433.44 | 0.73  |
|                                                             | 434.17 | 1.48  |
|                                                             | 434.85 | 2.31  |
|                                                             | 440.36 | 2.76  |
|                                                             | 441.87 | 1.69  |
|                                                             | 443.12 | 10.67 |
|                                                             | 447.73 | 0.99  |
|                                                             | 450.25 | 2.61  |
|                                                             | 454.43 | 2.70  |
|                                                             | 455.66 | 2.97  |
|                                                             | 459.27 | 13.92 |



|        |       |
|--------|-------|
| 459.69 | 0.42  |
| 461.30 | 2.63  |
| 462.67 | 0.65  |
| 463.42 | 2.58  |
| 468.59 | 3.58  |
| 470.20 | 7.15  |
| 473.75 | 3.80  |
| 476.57 | 7.45  |
| 477.46 | 0.76  |
| 483.28 | 8.92  |
| 483.96 | 3.87  |
| 485.37 | 56.94 |
| 486.72 | 1.02  |
| 489.91 | 2.46  |
| 489.96 | 3.10  |
| 491.61 | 0.31  |
| 497.82 | 6.01  |
| 503.14 | 2.59  |
| 503.15 | 0.86  |
| 503.58 | 2.25  |
| 510.64 | 7.85  |
| 513.79 | 0.29  |
| 525.52 | 1.92  |
| 526.36 | 1.14  |
| 527.61 | 4.49  |
| 532.34 | 1.39  |
| 532.81 | 1.57  |
| 533.42 | 4.21  |
| 539.45 | 5.75  |
| 554.50 | 1.57  |
| 558.63 | 1.97  |
| 560.74 | 3.97  |
| 569.20 | 0.77  |
| 581.38 | 2.25  |
| 582.25 | 1.09  |
| 582.70 | 1.90  |
| 584.17 | 3.75  |
| 585.29 | 16.13 |
| 588.27 | 1.65  |
| 588.43 | 1.64  |
| 597.67 | 1.81  |
| 598.14 | 3.27  |
| 599.06 | 0.62  |
| 600.33 | 1.72  |
| 605.20 | 4.83  |
| 605.27 | 2.66  |
| 606.33 | 0.97  |
| 610.81 | 3.36  |
| 611.12 | 1.81  |
| 614.42 | 25.35 |
| 615.32 | 0.80  |
| 618.34 | 9.63  |
| 623.79 | 3.04  |
| 625.16 | 0.64  |
| 627.08 | 1.94  |

|        |       |
|--------|-------|
| 627.25 | 1.50  |
| 627.52 | 1.71  |
| 628.12 | 24.06 |
| 632.03 | 0.88  |
| 632.66 | 1.43  |
| 633.71 | 1.51  |
| 634.16 | 6.68  |
| 639.84 | 1.43  |
| 641.69 | 2.15  |
| 652.23 | 6.25  |
| 653.32 | 4.82  |
| 654.53 | 74.22 |
| 658.73 | 0.65  |
| 660.02 | 4.27  |
| 666.45 | 1.35  |
| 668.31 | 8.51  |
| 669.54 | 10.12 |
| 669.86 | 22.89 |
| 671.06 | 6.19  |
| 679.18 | 2.29  |
| 679.35 | 2.83  |
| 680.34 | 1.62  |
| 680.45 | 1.94  |
| 681.54 | 7.07  |
| 682.27 | 1.69  |
| 682.99 | 3.33  |
| 685.26 | 4.29  |
| 685.50 | 3.60  |
| 692.76 | 13.10 |
| 693.74 | 27.10 |
| 694.10 | 2.43  |
| 707.83 | 13.97 |
| 721.27 | 36.72 |
| 735.87 | 5.31  |

---

**60 min exposure to 11 M NaOH**

|                                      |        |       |
|--------------------------------------|--------|-------|
| PC(10:0/10:0)                        | 565.66 | 0.45  |
| PC(13:0/13:0)                        | 650.00 | 7.55  |
| PC(10:0/18:0)                        | 676.67 | 5.51  |
| PC(10:0/18:2(9Z,12Z))                | 673.84 | 0.62  |
| PC(10:0/19:0)                        | 692.47 | 6.90  |
| PC(10:0/20:0)                        | 706.05 | 0.35  |
| PC(10:0/21:0)                        | 719.14 | 0.11  |
| PC(10:0/22:0)                        | 732.50 | 4.79  |
| PC(10:0/23:0)                        | 746.95 | 3.97  |
| PC(10:0/24:0)                        | 762.05 | 2.38  |
| PC(10:0/25:0)                        | 774.36 | 2.51  |
| PC(10:0/4:0)                         | 480.68 | 0.17  |
| PC(12:0/14:1(9Z))                    | 647.85 | 1.87  |
| PC(12:0/17:2(9Z,12Z))                | 688.26 | 4.61  |
| PC(12:0/18:1(9Z))                    | 703.09 | 4.32  |
| PC(12:0/18:2(9Z,12Z))                | 700.57 | 6.51  |
| PC(12:0/18:3(6Z,9Z,12Z))             | 698.67 | 3.90  |
| PC(12:0/18:4(6Z,9Z,12Z,15Z))         | 696.07 | 2.75  |
| PC(12:0/20:5(5Z,8Z,11Z,14Z,17Z))     | 724.06 | 13.11 |
| PC(12:0/22:6(4Z,7Z,10Z,13Z,16Z,19Z)) | 750.40 | 8.48  |

|                                              |        |       |
|----------------------------------------------|--------|-------|
| PC(12:0/26:0)                                | 817.29 | 9.31  |
| PC(13:0/18:3(6Z,9Z,12Z))                     | 713.17 | 5.50  |
| PC(13:0/18:4(6Z,9Z,12Z,15Z))                 | 711.44 | 0.47  |
| PC(13:0/20:4(5Z,8Z,11Z,14Z))                 | 739.55 | 4.01  |
| PC(13:0/20:5(5Z,8Z,11Z,14Z,17Z))             | 736.68 | 1.45  |
| PC(13:0/22:6(4Z,7Z,10Z,13Z,16Z,19Z))         | 762.81 | 46.58 |
| PC(14:0/18:2(11Z,14Z))                       | 729.81 | 2.41  |
| PC(14:0/18:3(9Z,12Z,15Z))                    | 726.50 | 2.10  |
| PC(14:0/18:4(6Z,9Z,12Z,15Z))                 | 724.65 | 21.23 |
| PC(14:0/18:4(6Z,9Z,12Z,15Z))                 | 725.26 | 2.01  |
| PC(14:0/2:0)                                 | 507.56 | 0.00  |
| PC(14:0/20:4(5Z,8Z,11Z,14Z))                 | 753.49 | 1.55  |
| PC(14:0/20:5(5Z,8Z,11Z,14Z,17Z))             | 751.34 | 2.24  |
| PC(14:1(9Z)/0:0)                             | 464.10 | 1.71  |
| PC(15:0/18:1(11Z))                           | 745.40 | 11.79 |
| PC(15:0/20:5(5Z,8Z,11Z,14Z,17Z))             | 766.03 | 94.71 |
| PC(15:0/22:1(11Z))                           | 801.67 | 5.42  |
| PC(15:1(9Z)/22:2(13Z,16Z))                   | 797.19 | 6.22  |
| PC(15:1(9Z)/22:4(7Z,10Z,13Z,16Z))            | 794.00 | 6.96  |
| PC(16:0/15:1(14))                            | 717.47 | 0.23  |
| PC(16:0/18:1(9Z))                            | 759.52 | 18.36 |
| PC(16:0/18:2(10E,12Z))                       | 757.21 | 5.15  |
| PC(16:0/2:0)                                 | 537.31 | 0.19  |
| PC(16:0/20:3(5Z,8Z,11Z))                     | 782.84 | 0.17  |
| PC(16:0/20:4(5Z,8Z,11Z,14Z))                 | 780.56 | 4.20  |
| PC(16:0/20:5(5Z,8Z,11Z,14Z,17Z))             | 779.93 | 3.71  |
| PC(16:0/22:4(7Z,10Z,13Z,16Z))                | 809.07 | 12.12 |
| PC(16:0/22:6(4E,7E,10E,13E,16E,19E))         | 804.80 | 2.74  |
| PC(16:0/23:5(8E,11E,14E,17E,20E))            | 820.61 | 20.55 |
| PC(16:0/26:0)                                | 872.95 | 0.97  |
| PC(16:0/26:2(5Z,9Z))                         | 869.90 | 0.62  |
| PC(16:0/3:0)                                 | 551.64 | 2.58  |
| PC(16:0/3:1(2E))                             | 548.92 | 6.57  |
| PC(16:0/5:0)                                 | 579.62 | 0.44  |
| PC(16:0/9:0(COOH))                           | 665.70 | 4.54  |
| PC(16:1(9Z)/22:6(4Z,7Z,10Z,13Z,16Z,19Z))     | 803.51 | 2.20  |
| PC(17:0/10:0)                                | 662.46 | 3.05  |
| PC(17:0/20:4(5Z,8Z,11Z,14Z))                 | 795.01 | 0.95  |
| PC(17:0/22:6(4Z,7Z,10Z,13Z,16Z,19Z))         | 819.28 | 3.35  |
| PC(17:1(10Z)/0:0)                            | 507.04 | 0.49  |
| PC(17:2(9Z,12Z)/0:0)                         | 505.00 | 0.16  |
| PC(18:0/11:1(10E))                           | 689.37 | 0.16  |
| PC(18:0/18:0)                                | 788.90 | 35.05 |
| PC(18:0/18:1(11Z))                           | 787.52 | 11.17 |
| PC(18:0/18:2(10Z,12Z))                       | 785.92 | 1.40  |
| PC(18:0/20:2(11Z,14Z))                       | 811.87 | 9.27  |
| PC(18:0/20:3(5Z,11Z,14Z))                    | 810.88 | 4.40  |
| PC(18:0/22:3(10Z,13Z,16Z))                   | 839.53 | 3.14  |
| PC(18:0/22:4(7Z,10Z,13Z,16Z))                | 837.02 | 9.51  |
| PC(18:0/22:5(4Z,7Z,10Z,13Z,16Z))             | 835.49 | 16.83 |
| PC(18:0/22:6(4Z,7Z,10Z,13Z,16Z,19Z))         | 834.32 | 5.79  |
| PC(18:1(9E)/2:0)                             | 564.22 | 0.30  |
| PC(18:2(2E,4E)/0:0)                          | 519.36 | 0.65  |
| PC(18:2(9Z,12Z)/22:6(4Z,7Z,10Z,13Z,16Z,19Z)) | 829.88 | 7.31  |
| PC(19:0/22:1(11Z))                           | 857.28 | 2.76  |

|                                                             |        |       |
|-------------------------------------------------------------|--------|-------|
| PC(19:1(9Z)/22:4(7Z,10Z,13Z,16Z))                           | 848.49 | 4.84  |
| PC(19:3(10Z,13Z,16Z)/0:0)                                   | 531.04 | 0.52  |
| PC(20:0/20:2(11Z,14Z))                                      | 841.70 | 2.10  |
| PC(20:0/22:4(7Z,10Z,13Z,16Z))                               | 864.65 | 0.53  |
| PC(20:0/22:5(7Z,10Z,13Z,16Z,19Z))                           | 862.66 | 0.50  |
| PC(20:0/22:6(4Z,7Z,10Z,13Z,16Z,19Z))                        | 861.10 | 0.02  |
| PC(20:0/24:1(15Z))                                          | 899.16 | 0.40  |
| PC(20:3(8Z,11Z,14Z)/0:0)                                    | 544.88 | 0.08  |
| PC(20:4(5Z,8Z,11Z,14Z)/0:0)                                 | 543.61 | 0.16  |
| PC(20:5(5Z,8Z,11Z,14Z,17Z)/22:6(4Z,7Z,10Z,13Z,16Z,19Z))     | 851.07 | 4.91  |
| PC(21:0/22:1(11Z))                                          | 884.90 | 0.91  |
| PC(21:0/22:2(13Z,16Z))                                      | 884.45 | 0.40  |
| PC(21:0/22:4(7Z,10Z,13Z,16Z))                               | 879.45 | 1.47  |
| PC(22:0/22:4(7Z,10Z,13Z,16Z))                               | 893.70 | 2.36  |
| PC(22:0/22:6(4Z,7Z,10Z,13Z,16Z,19Z))                        | 888.20 | 0.03  |
| PC(22:1(11Z)/22:2(13Z,16Z))                                 | 894.81 | 1.75  |
| PC(22:1(13E)/22:1(13E))                                     | 898.19 | 4.02  |
| PC(22:4(7Z,10Z,13Z,16Z)/0:0)                                | 571.57 | 0.28  |
| PC(22:4(7Z,10Z,13Z,16Z)/22:6(4Z,7Z,10Z,13Z,16Z,19Z))        | 881.64 | 5.13  |
| PC(22:6(4Z,7Z,10Z,13Z,16Z,19Z)/0:0)                         | 565.59 | 0.24  |
| PC(22:6(4Z,7Z,10Z,13Z,16Z,19Z)/0:0)                         | 567.59 | 1.08  |
| PC(22:6(4Z,7Z,10Z,13Z,16Z,19Z)/22:6(4Z,7Z,10Z,13Z,16Z,19Z)) | 876.83 | 7.41  |
| PC(23:0/18:0)                                               | 859.15 | 10.30 |
| PC(24:0/0:0)                                                | 607.73 | 0.32  |
| PC(25:0/18:0)                                               | 888.15 | 0.32  |
| PC(5:0/5:0)                                                 | 425.51 | 0.21  |
| PC(6:0/6:0)                                                 | 454.14 | 0.78  |
| PC(6:2(2E,4E)/6:2(2E,4E))                                   | 445.03 | 0.88  |
| PC(6:2(3E,5E)/14:2(11E,13E))                                | 556.72 | 0.20  |
| PC(8:2(2E,4E)/8:2(2E,4E))                                   | 501.00 | 0.02  |
| PC(O-10:1(9E)/2:0)                                          | 436.80 | 0.55  |
| PC(O-11:1(10E)/2:0)                                         | 450.35 | 2.72  |
| PC(O-14:0/2:0)                                              | 495.33 | 1.03  |
| PC(O-16:0/2:0)                                              | 522.48 | 0.03  |
| PC(O-18:2(9Z,12Z)/2:0)                                      | 547.42 | 0.06  |
|                                                             | 400.14 | 0.00  |
|                                                             | 400.63 | 0.53  |
|                                                             | 402.85 | 0.00  |
|                                                             | 405.13 | 1.34  |
|                                                             | 405.31 | 0.40  |
|                                                             | 408.21 | 0.04  |
|                                                             | 413.89 | 0.29  |
|                                                             | 415.99 | 0.00  |
|                                                             | 416.12 | 0.16  |
|                                                             | 416.68 | 0.35  |
|                                                             | 419.04 | 0.01  |
|                                                             | 419.27 | 0.84  |
|                                                             | 421.08 | 0.34  |
|                                                             | 429.62 | 0.13  |
|                                                             | 430.07 | 0.18  |
|                                                             | 432.56 | 0.01  |
|                                                             | 434.76 | 0.25  |
|                                                             | 448.68 | 0.01  |
|                                                             | 449.25 | 0.07  |
|                                                             | 449.29 | 0.01  |

|        |      |
|--------|------|
| 456.89 | 0.39 |
| 458.50 | 0.27 |
| 459.15 | 0.82 |
| 461.86 | 0.30 |
| 462.80 | 0.34 |
| 469.19 | 0.03 |
| 470.04 | 0.06 |
| 470.89 | 0.37 |
| 475.30 | 0.11 |
| 477.22 | 1.84 |
| 483.59 | 0.84 |
| 483.83 | 0.61 |
| 486.20 | 4.85 |
| 489.66 | 0.51 |
| 491.99 | 0.89 |
| 496.55 | 1.63 |
| 498.01 | 0.54 |
| 502.62 | 0.58 |
| 512.47 | 0.37 |
| 513.47 | 0.06 |
| 524.67 | 0.35 |
| 525.47 | 0.00 |
| 525.53 | 0.74 |
| 526.31 | 1.81 |
| 529.75 | 0.49 |
| 532.64 | 0.43 |
| 538.68 | 1.02 |
| 554.17 | 0.34 |
| 558.82 | 0.03 |
| 560.69 | 0.08 |
| 561.13 | 0.02 |
| 561.23 | 0.34 |
| 562.24 | 1.78 |
| 573.83 | 0.27 |
| 580.97 | 0.66 |
| 582.83 | 0.00 |
| 583.56 | 0.01 |
| 586.17 | 0.06 |
| 588.14 | 0.16 |
| 588.40 | 0.34 |
| 589.63 | 0.71 |
| 595.39 | 0.01 |
| 596.37 | 1.06 |
| 597.05 | 1.56 |
| 601.25 | 1.47 |
| 611.05 | 0.90 |
| 616.26 | 0.77 |
| 618.33 | 1.78 |
| 625.40 | 5.88 |
| 628.61 | 1.11 |
| 629.44 | 0.94 |
| 632.02 | 0.55 |
| 633.20 | 0.13 |
| 637.26 | 0.36 |
| 637.36 | 4.35 |

|        |       |
|--------|-------|
| 641.61 | 0.34  |
| 642.80 | 0.34  |
| 643.04 | 0.39  |
| 644.25 | 2.32  |
| 652.06 | 0.41  |
| 653.16 | 1.41  |
| 653.59 | 11.42 |
| 656.24 | 14.73 |
| 657.94 | 12.90 |
| 658.10 | 1.38  |
| 666.87 | 1.41  |
| 668.71 | 1.56  |
| 680.95 | 0.09  |
| 681.91 | 3.71  |
| 683.46 | 0.03  |
| 683.76 | 1.66  |
| 685.64 | 1.89  |
| 692.55 | 0.02  |
| 720.63 | 0.37  |
| 722.36 | 0.57  |
| 735.20 | 8.80  |

---

The identifiable phosphatidylcholine (PC) species present in the human control and experimental groups have been listed. The average m/z and lipid amount in pmol/μg are listed corresponding to the PC species have been provided. Also listed are the species that are not identified in the database, arranged by m/z. \*The lipid species identification is based on Lipidmaps database, used as a \*.csv file for bioinformatic analyses with MZmine 2.2 program. \*\* A representative mass/charge ratio is presented (variations in m/z was reconciled by MZmine 2.2).

Supplemental Table S3: Phosphatidylcholines identified by AMDMS-SL in control and NaOH exposed cornea

| Sample | Control | 30 sec | 12 min | 30 min | 60 min | 8 hr | Species                                                                                                                                                                                                                                                                                                                                                                                     |
|--------|---------|--------|--------|--------|--------|------|---------------------------------------------------------------------------------------------------------------------------------------------------------------------------------------------------------------------------------------------------------------------------------------------------------------------------------------------------------------------------------------------|
| 760.59 | 17.37   | 1.30   | 0.00   | 28.20  | 13.70  | 0.30 | D12-22:1D121-22:0D140-20:1D141-20:0D180-18:1D161-18:0                                                                                                                                                                                                                                                                                                                                       |
| 760.53 | 16.76   | 1.30   | 6.07   | 28.75  | 7.41   | 0.28 | A12-1-24:7/A141-22:7/A142-22:6/A143-22:5/A162-20:6/A163-20:5/A164-20:4/A165-20:3/A183-18:5/A184-18:4/P12-20:4/P121-24:6/P140-22:7/P141-22:6/P142-22:5/P143-22:4/P161-20:6/P162-20:5/P163-20:4/P164-20:3/P165-20:2/P182-18:5/P183-18:4                                                                                                                                                       |
| 734.57 | 5.22    | 0.75   | 2.05   | 3.39   | 0.00   | 0.08 | D12-20:0D140-18:0D160-16:0                                                                                                                                                                                                                                                                                                                                                                  |
| 734.51 | 5.22    | 0.75   | 2.05   | 3.39   | 0.00   | 0.08 | D12-20:0D140-18:0D160-16:0                                                                                                                                                                                                                                                                                                                                                                  |
| 785.54 | 4.73    | 1.46   | 53.01  | 6.80   | 15.84  | 0.14 | A12-22:7/A121-22:6/A141-20:6/A142-20:5/A143-20:4/A162-18:5/A163-18:4/A164-18:3/A165-18:2/P12-22:6/P121-22:5/P140-20:6/P141-20:5/P142-20:4/P143-20:3/P161-18:5/P162-18:4/P163-18:3/P164-18:2/P165-18:1                                                                                                                                                                                       |
| 785.56 | 4.67    | 4.59   | 2.07   | 1.61   | 16.77  | 0.22 | A141-26:7/A141-24:7/A142-24:6/A143-24:5/A161-22:7/A162-22:6/A163-22:5/A164-22:4/A165-22:3/A183-20:5/A184-20:4/A185-20:3/P12-20:6/P121-26:6/P140-24:7/P141-24:6/P142-24:5/P143-24:4/P160-22:7/P161-22:6/P162-22:5/P163-22:4/P164-22:3/P165-22:2/P182-20:6/P183-20:5/P184-20:4/P185-20:3                                                                                                      |
| 788.62 | 4.65    | 4.51   | 2.04   | 1.66   | 16.58  | 0.26 | D12-20:1D121-24:0D140-22:1D141-22:0D160-20:1D161-20:0D180-18:0                                                                                                                                                                                                                                                                                                                              |
| 810.60 | 4.43    | 0.81   | 13.96  | 6.56   | 11.42  | 0.00 | D12-26:4D121-26:3D140-24:4D141-24:3D142-24:2D143-24:1D160-22:4D161-22:3D162-22:2D163-22:1D164-22:0D180-20:4D181-20:3D182-20:2D183-20:1D184-20:0                                                                                                                                                                                                                                             |
| 810.54 | 4.39    | 0.82   | 3.55   | 6.07   | 11.67  | 0.00 | A164-24:7/A165-24:6/A166-24:5/A167-24:4/A168-24:3/A169-24:2/A170-24:1/A182-20:6/A183-20:5/A184-20:4/A185-20:3/P12-20:6/P121-26:7/P140-24:6/P141-20:5/P142-20:4/P143-20:3/P161-18:5/P162-18:4/P163-18:3/P164-18:2/P165-20:5                                                                                                                                                                  |
| 758.51 | 4.31    | 0.01   | 38.80  | 3.58   | 14.35  | 0.17 | A142-22:7/A143-22:6/A163-20:6/A164-20:5/A165-20:4/A184-18:5/P121-24:7/P141-22:7/P142-22:6/P143-22:5/P162-20:6/P163-20:5/P164-20:4/P165-20:3/P183-18:5/P184-18:4                                                                                                                                                                                                                             |
| 758.57 | 4.23    | 0.08   | 38.07  | 3.58   | 10.46  | 0.17 | D12-22:2D121-22:1D140-20:2D141-20:1D142-20:0D160-18:2D161-18:1D162-18:0                                                                                                                                                                                                                                                                                                                     |
| 732.55 | 3.22    | 1.42   | 0.00   | 6.42   | 2.39   | 0.00 | D12-20:1D121-20:0D140-18:1D141-18:0D160-16:1                                                                                                                                                                                                                                                                                                                                                |
| 732.50 | 3.13    | 2.25   | 0.00   | 6.20   | 1.09   | 0.00 | A121-22:7/A142-20:6/A143-20:5/A163-18:5/A164-18:4/A165-18:3/P12-22:7/P121-22:6/P141-20:6/P142-20:5/P143-20:4/P162-18:5/P163-18:4/P164-18:3/P165-18:2                                                                                                                                                                                                                                        |
| 782.57 | 2.84    | 0.64   | 0.00   | 16.07  | 13.05  | 0.07 | D12-24:4D121-24:3D140-22:4D141-22:3D142-22:2D143-22:1D160-20:4D161-20:3D162-20:2D163-20:1D164-20:0D180-18:4D181-18:3D182-18:2                                                                                                                                                                                                                                                               |
| 782.51 | 2.77    | 0.20   | 0.00   | 16.41  | 13.33  | 0.07 | A164-22:7/A165-22:6/A166-20:6/P143-24:7/P163-22:7/P164-22:6/P165-22:5/P184-20:6/P185-20:5                                                                                                                                                                                                                                                                                                   |
| 784.59 | 1.88    | 0.00   | 9.64   | 0.00   | 0.70   | 0.00 | D12-20:4D121-24:2D140-22:3D141-22:2D142-22:1D143-22:0D160-20:3D161-20:2D162-20:1D163-20:0D180-18:3D181-18:2                                                                                                                                                                                                                                                                                 |
| 784.53 | 1.65    | 0.00   | 15.11  | 0.00   | 0.00   | 0.00 | A143-24:7/A163-22:7/A164-22:6/A165-22:5/A184-20:6/A185-20:5/P142-24:7/P143-24:6/P162-22:7/P163-22:6/P164-22:5/P165-22:4/P183-20:6/P184-20:5/P185-20:4                                                                                                                                                                                                                                       |
| 636.45 | 1.62    | 1.60   | 1.60   | 1.60   | 1.60   | 1.63 | D12-0-13:0                                                                                                                                                                                                                                                                                                                                                                                  |
| IS     | 1.60    | 1.60   | 1.60   | 1.60   | 1.60   | 1.60 | PC+HH                                                                                                                                                                                                                                                                                                                                                                                       |
| 746.48 | 1.00    | 0.47   | 1.07   | 0.04   | 0.14   | 0.00 | D121-22:7D142-22:6D143-20:5D163-18:5D164-18:4D185-18:3                                                                                                                                                                                                                                                                                                                                      |
| 746.61 | 0.99    | 0.47   | 0.88   | 0.04   | 0.02   | 0.00 | A12-22:1/A121-22:0/A140-20:1/A141-20:0/A160-18:1/A161-18:0/P12-22:0/P140-20:0/P160-18:0                                                                                                                                                                                                                                                                                                     |
| 720.46 | 0.83    | 0.56   | 0.00   | 0.11   | 0.07   | 0.23 | D12-1-20:0D142-18:5D143-18:4D162-16:5D163-16:4                                                                                                                                                                                                                                                                                                                                              |
| 720.59 | 0.80    | 0.62   | 0.00   | 0.11   | 5.20   | 0.23 | A120-20:0/A140-18:0/A160-16:0                                                                                                                                                                                                                                                                                                                                                               |
| 706.54 | 0.79    | 3.24   | 1.16   | 5.96   | 0.00   | 0.06 | D12-18:0D140-16:0                                                                                                                                                                                                                                                                                                                                                                           |
| 706.48 | 0.76    | 3.17   | 1.17   | 5.98   | 0.00   | 0.04 | A121-20:6/A142-18:5/A143-18:4/A162-16:5/A163-16:4/P120-20:6/P121-20:5/P141-18:5/P142-18:4/P143-18:3/P161-16:5/P162-16:4/P163-16:3                                                                                                                                                                                                                                                           |
| 816.65 | 0.76    | 4.55   | 0.00   | 0.00   | 5.31   | 0.14 | D12-26:1D121-26:0D140-24:1D141-24:0D160-22:1D161-22:0D180-20:1D181-20:0                                                                                                                                                                                                                                                                                                                     |
| 816.59 | 0.72    | 4.63   | 0.00   | 0.00   | 5.39   | 0.13 | A141-26:7/A142-26:6/A143-26:5/A161-24:7/A162-24:6/A163-24:5/A164-24:4/A165-24:3/A181-22:7/A182-22:6/ Others                                                                                                                                                                                                                                                                                 |
| 812.62 | 0.68    | 1.40   | 2.40   | 1.12   | 2.00   | 0.00 | D12-26:3D121-26:2D140-24:3D141-24:2D142-24:1D143-24:0D160-22:3D161-22:2D162-22:1D163-22:0D180-20:3D181-20:2D182-20:1D183-20:0                                                                                                                                                                                                                                                               |
| 812.56 | 0.66    | 1.40   | 20.78  | 1.10   | 1.90   | 0.00 | A143-26:7/A163-24:7/A164-24:6/A165-24:5/A183-22:7/A184-22:6/A185-22:5/A20-20:6/A20-20:5/P142-26:7/P143-26:6/P162-24:7/P163-24:6/P164-24:5/P165-24:4/P182-22:7/P183-22:6/P184-22:5/P20-20:6/P20-20:5                                                                                                                                                                                         |
| 808.59 | 0.58    | 0.01   | 0.00   | 0.34   | 0.19   | 0.00 | D12-26:5D121-26:4D140-24:5D141-24:4D142-24:3D143-24:2D160-22:5D161-22:4D162-22:3D163-22:2D164-22:1D165-22:0D180-20:5D181-20:4D182-20:3D183-20:2D184-20:1D185-20:0                                                                                                                                                                                                                           |
| 808.53 | 0.57    | 0.00   | 0.65   | 0.34   | 0.19   | 0.00 | A165-24:7/A185-22:7/A206-20:6/P164-24:7/P165-24:6/P184-22:7/P185-22:6/P205-20:6                                                                                                                                                                                                                                                                                                             |
| 718.58 | 0.56    | 0.37   | 1.58   | 1.77   | 1.95   | 0.00 | A120-20:1/A121-20:0/A140-18:1/A141-18:0/A160-18:1/P120-20:0/P140-18:0/P160-16:0                                                                                                                                                                                                                                                                                                             |
| 718.44 | 0.51    | 0.53   | 1.79   | 1.77   | 1.35   | 0.03 | D143-18:5D163-16:5D164-16:4                                                                                                                                                                                                                                                                                                                                                                 |
| 774.64 | 0.50    | 0.03   | 1.33   | 0.00   | 0.22   | 0.00 | A120-24:1/A121-24:0/A140-22:1/A141-22:0/A160-20:1/A161-20:0/A180-18:1/P120-24:0/P140-22:0/P160-20:0/P180-18:0                                                                                                                                                                                                                                                                               |
| 774.51 | 0.47    | 0.01   | 1.30   | 0.00   | 0.23   | 0.00 | D121-24:7D141-22:7D142-22:6D143-22:5D162-20:6D163-20:5D164-20:4D165-20:3D183-18:5D184-18:4                                                                                                                                                                                                                                                                                                  |
| 765.58 | 0.44    | 0.02   | 0.41   | 0.39   | 0.38   | 0.04 | A120-24:5/A121-24:4/A140-22:5/A141-22:4/A142-22:3/A143-22:2/A160-20:5/A161-20:4/A162-20:3/A163-20:2/A164-20:1/A165-20:0/A180-18:5/A181-18:4/A182-18:3/P120-24:4/P121-24:3/P140-22:4/P141-22:3/ Others                                                                                                                                                                                       |
| 762.54 | 0.40    | 0.64   | 0.00   | 31.58  | 0.00   | 0.03 | A12-24:7/A121-24:6/A140-22:7/A141-22:6/A142-22:5/A143-22:4/A161-20:6/A162-20:5/A163-20:4/A164-20:3/A165-20:2/A182-18:5/A183-18:4/P12-24:6/P121-24:5/P140-22:6/P141-22:5/P142-22:4/P143-22:3/P160-20:6/P161-20:5/P162-20:4/ Others                                                                                                                                                           |
| 794.61 | 0.33    | 0.04   | 2.53   | 0.02   | 0.84   | 0.00 | A120-26:5/A121-26:4/A140-24:5/A141-24:4/A142-24:3/A143-24:2/A160-22:5/A161-22:4/A162-22:3/A163-22:2/A164-22:1/A165-22:0/A180-20:5/A181-20:4/A182-20:3/A183-20:2/A184-20:1/A185-20:0/P120-26:4/P121-26:3/P140-24:4/P141-24:3/ Others                                                                                                                                                         |
| 454.33 | 0.32    | 0.87   | 1.07   | 2.19   | 9.01   | 0.22 | A140-1:0                                                                                                                                                                                                                                                                                                                                                                                    |
| 454.29 | 0.32    | 0.86   | 1.07   | 2.16   | 8.91   | 0.21 | D13:0                                                                                                                                                                                                                                                                                                                                                                                       |
| 794.48 | 0.25    | 0.04   | 2.53   | 0.02   | 0.74   | 0.00 | D16:5-22:7                                                                                                                                                                                                                                                                                                                                                                                  |
| 806.51 | 0.22    | 0.01   | 0.81   | 0.00   | 0.05   | 0.00 | P165-24:7/P185-22:7/P206-20:6                                                                                                                                                                                                                                                                                                                                                               |
| 806.57 | 0.22    | 0.01   | 0.99   | 0.00   | 0.06   | 0.00 | D12-26:6D121-26:5D140-24:6D141-24:5D142-24:4D143-24:3D160-22:6D161-22:5D162-22:4D163-22:3D164-22:2D165-22:1D180-20:6D181-20:5D182-20:4D183-20:3D184-20:2D185-20:1                                                                                                                                                                                                                           |
| 780.55 | 0.14    | 0.33   | 1.23   | 0.01   | 6.03   | 0.00 | D12-24:5D121-24:4D140-22:5D141-22:4D142-22:3D143-22:2D160-20:5D161-20:4D162-20:3D163-20:2D164-20:1D165-20:0D180-18:5D181-18:4D182-18:3                                                                                                                                                                                                                                                      |
| 772.62 | 0.14    | 0.00   | 0.14   | 0.03   | 0.00   | 0.00 | A120-24:2/A121-24:1/A140-22:2/A141-22:1/A142-22:0/A160-20:2/A161-20:1/A162-20:0/A180-18:2/A181-18:1/P120-24:1/P121-24:0/P140-22:1/P141-22:0/P160-20:1/P161-20:0/P180-18:1                                                                                                                                                                                                                   |
| 762.60 | 0.13    | 1.92   | 0.00   | 30.98  | 5.48   | 0.00 | D12-22:0D140-20:0D160-18:0                                                                                                                                                                                                                                                                                                                                                                  |
| 748.62 | 0.13    | 0.01   | 38.68  | 0.58   | 0.05   | 0.00 | A120-22:0/A140-20:0/A160-18:0                                                                                                                                                                                                                                                                                                                                                               |
| 748.49 | 0.12    | 0.00   | 53.21  | 0.59   | 0.06   | 0.00 | D12-22:7D121-22:6D141-20:6D142-20:5D143-20:4D162-18:5D163-18:4D164-18:3D165-18:2                                                                                                                                                                                                                                                                                                            |
| 730.54 | 0.10    | 0.00   | 0.00   | 0.00   | 0.00   | 0.00 | D12-20:2D121-20:1D140-18:2D141-18:1D142-18:0D160-16:2D161-16:1                                                                                                                                                                                                                                                                                                                              |
| 730.48 | 0.10    | 0.00   | 0.00   | 0.00   | 0.00   | 0.00 | A143-20:6/A164-18:5/A165-18:4/P121-22:7/P142-20:6/P143-20:5/P163-18:5/P164-18:4/P165-18:3                                                                                                                                                                                                                                                                                                   |
| 736.53 | 0.09    | 0.00   | 1.62   | 0.00   | 0.00   | 0.00 | A120-22:6/A121-22:5/A140-20:6/A141-20:5/A142-20:4/A143-20:3/A161-18:5/A162-18:4/A163-18:3/A164-18:2/A165-18:1/P120-22:5/P121-22:4/P140-20:5/P141-20:4/P142-20:3/P143-20:2/P160-18:5/P161-18:4/P162-18:3/P163-18:2/P164-18:1/P165-18:0                                                                                                                                                       |
| 802.54 | 0.09    | 0.35   | 0.00   | 0.00   | 4.87   | 0.08 | D12-1-26:7D141-24:7D142-24:6D143-24:5D161-22:7D162-22:6D163-22:5D164-22:4D165-22:3D182-20:6D183-20:5D184-20:4D185-20:3                                                                                                                                                                                                                                                                      |
| 524.31 | 0.09    | 0.71   | 4.89   | 3.82   | 8.76   | 0.28 | P206                                                                                                                                                                                                                                                                                                                                                                                        |
| 524.37 | 0.09    | 1.39   | 2.46   | 3.74   | 8.71   | 0.27 | P181                                                                                                                                                                                                                                                                                                                                                                                        |
| 750.51 | 0.09    | 0.00   | 1.30   | 0.04   | 0.03   | 0.00 | D12-22:6D121-22:5D140-20:6D141-20:5D142-20:4D143-20:3D161-18:5D162-18:4D163-18:3D164-18:2D165-18:1                                                                                                                                                                                                                                                                                          |
| 796.62 | 0.08    | 0.01   | 0.56   | 0.08   | 0.21   | 0.00 | A120-26:4/A121-26:3/A140-24:4/A141-24:3/A142-24:3/A143-24:2/A161-22:6/A162-22:5/A163-22:4/A164-22:3/A165-22:2/A166-22:1/A180-20:4/A181-20:3/A182-20:2/A183-20:1/A184-20:0/P120-26:3/P121-26:2/P140-24:3/P141-24:2/P142-24:1/P143-24:0/P160-22:3/P161-22:2/P162-22:1/P163-22:0/P164-22:0/P165-22:0/P180-18:4/P181-18:3/A182-18:2/P183-20:2/P184-20:1/P185-20:0/P186-20:0/P187-20:0/P188-20:0 |
| 768.59 | 0.08    | 0.00   | 2.93   | 0.03   | 0.08   | 0.03 | A120-24:4/A121-24:3/A140-22:4/A141-22:3/A142-22:2/A143-22:1/A160-20:4/A161-20:3/A162-20:2/A163-20:1/A164-20:0/A180-18:4/A181-18:3/A182-18:2/P120-24:3/P121-24:2/P140-22:3/P141-22:2/P142-22:1/P143-22:0/P160-20:3/P161-20:2/P162-20:1/P163-20:0                                                                                                                                             |
| 744.46 | 0.08    | 0.01   | 1.22   | 0.03   | 0.00   | 0.00 | D143-20:6D164-18:5D165-18:4                                                                                                                                                                                                                                                                                                                                                                 |
| 772.49 | 0.08    | 0.00   | 0.00   | 0.03   | 0.00   | 0.00 | D142-22:7D143-22:6D163-20:6D164-20:5D165-20:4D184-18:5                                                                                                                                                                                                                                                                                                                                      |
| 744.59 | 0.08    | 0.01   | 1.44   | 0.03   | 0.04   | 0.00 | A120-22:2/A121-22:1/A140-20:2/A141-20:1/A142-20:0/A160-18:2/A161-18:1/A162-18:0/P120-22:1/P121-22:0/P140-20:1/P141-20:0/P160-18:1/P161-18:0                                                                                                                                                                                                                                                 |
| 780.50 | 0.08    | 0.28   | 1.23   | 0.01   | 6.16   | 0.00 | A165-22:7/P164-22:7/P165-22:6/P185-20:6                                                                                                                                                                                                                                                                                                                                                     |
| 676.49 | 0.07    | 0.80   | 1.91   | 0.00   | 0.03   | 0.00 | D120-16:1D121-16:0D140-14:1                                                                                                                                                                                                                                                                                                                                                                 |
| 802.67 | 0.06    | 0.40   | 0.00   | 0.00   | 0.39   | 0.00 | A120-26:1/A121-26:0/A140-24:1/A141-24:0/A160-22:1/A161-22:0/A180-20:1/A181-20:0/P120-26:0/P140-24:0/P160-22:0/P180-20:0                                                                                                                                                                                                                                                                     |
| 796.49 | 0.06    | 0.01   | 0.56   | 0.08   | 0.21   | 0.00 | D164-22:7D165-22:6D185-20:6                                                                                                                                                                                                                                                                                                                                                                 |
| 836.56 | 0.05    | 0.01   | 1.28   | 0.01   | 0.14   | 0.00 | A165-26:7/A185-24:7/A205-22:7/A206-22:6/P164-26:7/P165-26:6/P184-24:7/P185-24:6/P204-22:7/P205-22:6/P206-22:5                                                                                                                                                                                                                                                                               |
| 676.43 | 0.05    | 0.93   | 1.98   | 0.00   | 0.00   | 0.05 | A143-16:5/P142-16:5/P143-16:4                                                                                                                                                                                                                                                                                                                                                               |
| 836.62 | 0.05    | 0.01   | 1.27   | 0.01   | 0.14   | 0.00 | D140-26:5D141-26:4D142-26:3D143-26:2D160-24:5D161-24:4D162-24:3D163-24:2D164-24:1D165-24:0D180-22:5D181-22:4D182-22:3D183-22:2D184-22:1D185-22:0D200-20:5D201-20:4D202-20:3                                                                                                                                                                                                                 |
| 496.34 | 0.05    | 0.34   | 1.02   | 18.11  | 33.98  | 0.33 | D16:0                                                                                                                                                                                                                                                                                                                                                                                       |
| 722.48 | 0.04    | 0.00   | 2.82   | 0.03   | 0.00   | 0.00 | D120-20:6D121-20:5D141-18:5D1                                                                                                                                                                                                                                                                                                                                                               |

896.65 0.02 0.00 0.00 0.02 0.05 0.00 A20-3-26;7A20-4-26;6A20-5-26;5A20-6-26;4A20-7-26;3A20-8-26;2A20-9-26;1A20-10-26;0A20-11-26;D20-12-26;C20-13-26;B20-14-26;A20-15-26;Z20-16-26;Y20-17-26;X20-18-26;W20-19-26;V20-20-26;U20-21-26;T20-22-26;S20-23-26;R20-24-26;Q20-25-26;P20-26-26;O20-27-26;N20-28-26;M20-29-26;L20-30-26;K20-31-26;J20-32-26;I20-33-26;H20-34-26;G20-35-26;F20-36-26;E20-37-26;D20-38-26;C20-39-26;B20-40-26;A20-41-26;Z20-42-26;Y20-43-26;X20-44-26;W20-45-26;V20-46-26;U20-47-26;T20-48-26;S20-49-26;R20-50-26;Q20-51-26;P20-52-26;O20-53-26;N20-54-26;M20-55-26;L20-56-26;K20-57-26;J20-58-26;I20-59-26;H20-60-26;G20-61-26;F20-62-26;E20-63-26;D20-64-26;C20-65-26;B20-66-26;A20-67-26;Z20-68-26;Y20-69-26;X20-70-26;W20-71-26;V20-72-26;U20-73-26;T20-74-26;S20-75-26;R20-76-26;Q20-77-26;P20-78-26;O20-79-26;N20-80-26;M20-81-26;L20-82-26;K20-83-26;J20-84-26;I20-85-26;H20-86-26;G20-87-26;F20-88-26;E20-89-26;D20-90-26;C20-91-26;B20-92-26;A20-93-26;Z20-94-26;Y20-95-26;X20-96-26;W20-97-26;V20-98-26;U20-99-26;T20-100-26;S20-101-26;R20-102-26;Q20-103-26;P20-104-26;O20-105-26;N20-106-26;M20-107-26;L20-108-26;K20-109-26;J20-110-26;I20-111-26;H20-112-26;G20-113-26;F20-114-26;E20-115-26;D20-116-26;C20-117-26;B20-118-26;A20-119-26;Z20-120-26;Y20-121-26;X20-122-26;W20-123-26;V20-124-26;U20-125-26;T20-126-26;S20-127-26;R20-128-26;Q20-129-26;P20-130-26;O20-131-26;N20-132-26;M20-133-26;L20-134-26;K20-135-26;J20-136-26;I20-137-26;H20-138-26;G20-139-26;F20-140-26;E20-141-26;D20-142-26;C20-143-26;B20-144-26;A20-145-26;Z20-146-26;Y20-147-26;X20-148-26;W20-149-26;V20-150-26;U20-151-26;T20-152-26;S20-153-26;R20-154-26;Q20-155-26;P20-156-26;O20-157-26;N20-158-26;M20-159-26;L20-160-26;K20-161-26;J20-162-26;I20-163-26;H20-164-26;G20-165-26;F20-166-26;E20-167-26;D20-168-26;C20-169-26;B20-170-26;A20-171-26;Z20-172-26;Y20-173-26;X20-174-26;W20-175-26;V20-176-26;U20-177-26;T20-178-26;S20-179-26;R20-180-26;Q20-181-26;P20-182-26;O20-183-26;N20-184-26;M20-185-26;L20-186-26;K20-187-26;J20-188-26;I20-189-26;H20-190-26;G20-191-26;F20-192-26;E20-193-26;D20-194-26;C20-195-26;B20-196-26;A20-197-26;Z20-198-26;Y20-199-26;X20-200-26;W20-201-26;V20-202-26;U20-203-26;T20-204-26;S20-205-26;R20-206-26;Q20-207-26;P20-208-26;O20-209-26;N20-210-26;M20-211-26;L20-212-26;K20-213-26;J20-214-26;I20-215-26;H20-216-26;G20-217-26;F20-218-26;E20-219-26;D20-220-26;C20-221-26;B20-222-26;A20-223-26;Z20-224-26;Y20-225-26;X20-226-26;W20-227-26;V20-228-26;U20-229-26;T20-230-26;S20-231-26;R20-232-26;Q20-233-26;P20-234-26;O20-235-26;N20-236-26;M20-237-26;L20-238-26;K20-239-26;J20-240-26;I20-241-26;H20-242-26;G20-243-26;F20-244-26;E20-245-26;D20-246-26;C20-247-26;B20-248-26;A20-249-26;Z20-250-26;Y20-251-26;X20-252-26;W20-253-26;V20-254-26;U20-255-26;T20-256-26;S20-257-26;R20-258-26;Q20-259-26;P20-260-26;O20-261-26;N20-262-26;M20-263-26;L20-264-26;K20-265-26;J20-266-26;I20-267-26;H20-268-26;G20-269-26;F20-270-26;E20-271-26;D20-272-26;C20-273-26;B20-274-26;A20-275-26;Z20-276-26;Y20-277-26;X20-278-26;W20-279-26;V20-280-26;U20-281-26;T20-282-26;S20-283-26;R20-284-26;Q20-285-26;P20-286-26;O20-287-26;N20-288-26;M20-289-26;L20-290-26;K20-291-26;J20-292-26;I20-293-26;H20-294-26;G20-295-26;F20-296-26;E20-297-26;D20-298-26;C20-299-26;B20-300-26;A20-301-26;Z20-302-26;Y20-303-26;X20-304-26;W20-305-26;V20-306-26;U20-307-26;T20-308-26;S20-309-26;R20-310-26;Q20-311-26;P20-312-26;O20-313-26;N20-314-26;M20-315-26;L20-316-26;K20-317-26;J20-318-26;I20-319-26;H20-320-26;G20-321-26;F20-322-26;E20-323-26;D20-324-26;C20-325-26;B20-326-26;A20-327-26;Z20-328-26;Y20-329-26;X20-330-26;W20-331-26;V20-332-26;U20-333-26;T20-334-26;S20-335-26;R20-336-26;Q20-337-26;P20-338-26;O20-339-26;N20-340-26;M20-341-26;L20-342-26;K20-343-26;J20-344-26;I20-345-26;H20-346-26;G20-347-26;F20-348-26;E20-349-26;D20-350-26;C20-351-26;B20-352-26;A20-353-26;Z20-354-26;Y20-355-26;X20-356-26;W20-357-26;V20-358-26;U20-359-26;T20-360-26;S20-361-26;R20-362-26;Q20-363-26;P20-364-26;O20-365-26;N20-366-26;M20-367-26;L20-368-26;K20-369-26;J20-370-26;I20-371-26;H20-372-26;G20-373-26;F20-374-26;E20-375-26;D20-376-26;C20-377-26;B20-378-26;A20-379-26;Z20-380-26;Y20-381-26;X20-382-26;W20-383-26;V20-384-26;U20-385-26;T20-386-26;S20-387-26;R20-388-26;Q20-389-26;P20-390-26;O20-391-26;N20-392-26;M20-393-26;L20-394-26;K20-395-26;J20-396-26;I20-397-26;H20-398-26;G20-399-26;F20-400-26;E20-401-26;D20-402-26;C20-403-26;B20-404-26;A20-405-26;Z20-406-26;Y20-407-26;X20-408-26;W20-409-26;V20-410-26;U20-411-26;T20-412-26;S20-413-26;R20-414-26;Q20-415-26;P20-416-26;O20-417-26;N20-418-26;M20-419-26;L20-420-26;K20-421-26;J20-422-26;I20-423-26;H20-424-26;G20-425-26;F20-426-26;E20-427-26;D20-428-26;C20-429-26;B20-430-26;A20-431-26;Z20-432-26;Y20-433-26;X20-434-26;W20-435-26;V20-436-26;U20-437-26;T20-438-26;S20-439-26;R20-440-26;Q20-441-26;P20-442-26;O20-443-26;N20-444-26;M20-445-26;L20-446-26;K20-447-26;J20-448-26;I20-449-26;H20-450-26;G20-451-26;F20-452-26;E20-453-26;D20-454-26;C20-455-26;B20-456-26;A20-457-26;Z20-458-26;Y20-459-26;X20-460-26;W20-461-26;V20-462-26;U20-463-26;T20-464-26;S20-465-26;R20-466-26;Q20-467-26;P20-468-26;O20-469-26;N20-470-26;M20-471-26;L20-472-26;K20-473-26;J20-474-26;I20-475-26;H20-476-26;G20-477-26;F20-478-26;E20-479-26;D20-480-26;C20-481-26;B20-482-26;A20-483-26;Z20-484-26;Y20-485-26;X20-486-26;W20-487-26;V20-488-26;U20-489-26;T20-490-26;S20-491-26;R20-492-26;Q20-493-26;P20-494-26;O20-495-26;N20-496-26;M20-497-26;L20-498-26;K20-499-26;J20-500-26;I20-501-26;H20-502-26;G20-503-26;F20-504-26;E20-505-26;D20-506-26;C20-507-26;B20-508-26;A20-509-26;Z20-510-26;Y20-511-26;X20-512-26;W20-513-26;V20-514-26;U20-515-26;T20-516-26;S20-517-26;R20-518-26;Q20-519-26;P20-520-26;O20-521-26;N20-522-26;M20-523-26;L20-524-26;K20-525-26;J20-526-26;I20-527-26;H20-528-26;G20-529-26;F20-530-26;E20-531-26;D20-532-26;C20-533-26;B20-534-26;A20-535-26;Z20-536-26;Y20-537-26;X20-538-26;W20-539-26;V20-540-26;U20-541-26;T20-542-26;S20-543-26;R20-544-26;Q20-545-26;P20-546-26;O20-547-26;N20-548-26;M20-549-26;L20-550-26;K20-551-26;J20-552-26;I20-553-26;H20-554-26;G20-555-26;F20-556-26;E20-557-26;D20-558-26;C20-559-26;B20-560-26;A20-561-26;Z20-562-26;Y20-563-26;X20-564-26;W20-565-26;V20-566-26;U20-567-26;T20-568-26;S20-569-26;R20-570-26;Q20-571-26;P20-572-26;O20-573-26;N20-574-26;M20-575-26;L20-576-26;K20-577-26;J20-578-26;I20-579-26;H20-580-26;G20-581-26;F20-582-26;E20-583-26;D20-584-26;C20-585-26;B20-586-26;A20-587-26;Z20-588-26;Y20-589-26;X20-590-26;W20-591-26;V20-592-26;U20-593-26;T20-594-26;S20-595-26;R20-596-26;Q20-597-26;P20-598-26;O20-599-26;N20-600-26;M20-601-26;L20-602-26;K20-603-26;J20-604-26;I20-605-26;H20-606-26;G20-607-26;F20-608-26;E20-609-26;D20-610-26;C20-611-26;B20-612-26;A20-613-26;Z20-614-26;Y20-615-26;X20-616-26;W20-617-26;V20-618-26;U20-619-26;T20-620-26;S20-621-26;R20-622-26;Q20-623-26;P20-624-26;O20-625-26;N20-626-26;M20-627-26;L20-628-26;K20-629-26;J20-630-26;I20-631-26;H20-632-26;G20-633-26;F20-634-26;E20-635-26;D20-636-26;C20-637-26;B20-638-26;A20-639-26;Z20-640-26;Y20-641-26;X20-642-26;W20-643-26;V20-644-26;U20-645-26;T20-646-26;S20-647-26;R20-648-26;Q20-649-26;P20-650-26;O20-651-26;N20-652-26;M20-653-26;L20-654-26;K20-655-26;J20-656-26;I20-657-26;H20-658-26;G20-659-26;F20-660-26;E20-661-26;D20-662-26;C20-663-26;B20-664-26;A20-665-26;Z20-666-26;Y20-667-26;X20-668-26;W20-669-26;V20-670-26;U20-671-26;T20-672-26;S20-673-26;R20-674-26;Q20-675-26;P20-676-26;O20-677-26;N20-678-26;M20-679-26;L20-680-26;K20-681-26;J20-682-26;I20-683-26;H20-684-26;G20-685-26;F20-686-26;E20-687-26;D20-688-26;C20-689-26;B20-690-26;A20-691-26;Z20-692-26;Y20-693-26;X20-694-26;W20-695-26;V20-696-26;U20-697-26;T20-698-26;S20-699-26;R20-700-26;Q20-701-26;P20-702-26;O20-703-26;N20-704-26;M20-705-26;L20-706-26;K20-707-26;J20-708-26;I20-709-26;H20-710-26;G20-711-26;F20-712-26;E20-713-26;D20-714-26;C20-715-26;B20-716-26;A20-717-26;Z20-718-26;Y20-719-26;X20-720-26;W20-721-26;V20-722-26;U20-723-26;T20-724-26;S20-725-26;R20-726-26;Q20-727-26;P20-728-26;O20-729-26;N20-730-26;M20-731-26;L20-732-26;K20-733-26;J20-734-26;I20-735-26;H20-736-26;G20-737-26;F20-738-26;E20-739-26;D20-740-26;C20-741-26;B20-742-26;A20-743-26;Z20-744-26;Y20-745-26;X20-746-26;W20-747-26;V20-748-26;U20-749-26;T20-750-26;S20-751-26;R20-752-26;Q20-753-26;P20-754-26;O20-755-26;N20-756-26;M20-757-26;L20-758-26;K20-759-26;J20-760-26;I20-761-26;H20-762-26;G20-763-26;F20-764-26;E20-765-26;D20-766-26;C20-767-26;B20-768-26;A20-769-26;Z20-770-26;Y20-771-26;X20-772-26;W20-773-26;V20-774-26;U20-775-26;T20-776-26;S20-777-26;R20-778-26;Q20-779-26;P20-780-26;O20-781-26;N20-782-26;M20-783-26;L20-784-26;K20-785-26;J20-786-26;I20-787-26;H20-788-26;G20-789-26;F20-790-26;E20-791-26;D20-792-26;C20-793-26;B20-794-26;A20-795-26;Z20-796-26;Y20-797-26;X20-798-26;W20-799-26;V20-800-26;U20-801-26;T20-802-26;S20-803-26;R20-804-26;Q20-805-26;P20-806-26;O20-807-26;N20-808-26;M20-809-26;L20-810-26;K20-811-26;J20-812-26;I20-813-26;H20-814-26;G20-815-26;F20-816-26;E20-817-26;D20-818-26;C20-819-26;B20-820-26;A20-821-26;Z20-822-26;Y20-823-26;X20-824-26;W20-825-26;V20-826-26;U20-827-26;T20-828-26;S20-829-26;R20-830-26;Q20-831-26;P20-832-26;O20-833-26;N20-834-26;M20-835-26;L20-836-26;K20-837-26;J20-838-26;I20-839-26;H20-840-26;G20-841-26;F20-842-26;E20-843-26;D20-844-26;C20-845-26;B20-846-26;A20-847-26;Z20-848-26;Y20-849-26;X20-850-26;W20-851-26;V20-852-26;U20-853-26;T20-854-26;S20-855-26;R20-856-26;Q20-857-26;P20-858-26;O20-859-26;N20-860-26;M20-861-26;L20-862-26;K20-863-26;J20-864-26;I20-865-26;H20-866-26;G20-867-26;F20-868-26;E20-869-26;D20-870-26;C20-871-26;B20-872-26;A20-873-26;Z20-874-26;Y20-875-26;X20-876-26;W20-877-26;V20-878-26;U20-879-26;T20-880-26;S20-881-26;R20-882-26;Q20-883-26;P20-884-26;O20-885-26;N20-886-26;M20-887-26;L20-888-26;K20-889-26;J20-890-26;I20-891-26;H20-892-26;G20-893-26;F20-894-26;E20-895-26;D20-896-26;C20-897-26;B20-898-26;A20-899-26;Z20-900-26;Y20-901-26;X20-902-26;W20-903-26;V20-904-26;U20-905-26;T20-906-26;S20-907-26;R20-908-26;Q20-909-26;P20-910-26;O20-911-26;N20-912-26;M20-913-26;L20-914-26;K20-915-26;J20-916-26;I20-917-26;H20-918-26;G20-919-26;F20-920-26;E20-921-26;D20-922-26;C20-923-26;B20-924-26;A20-925-26;Z20-926-26;Y20-927-26;X20-928-26;W20-929-26;V20-930-26;U20-931-26;T20-932-26;S20-933-26;R20-934-26;Q20-935-26;P20-936-26;O20-937-26;N20-938-26;M20-939-26;L20-940-26;K20-941-26;J20-942-26;I20-943-26;H20-944-26;G20-945-26;F20-946-26;E20-947-26;D20-948-26;C20-949-26;B20-950-26;A20-951-26;Z20-952-26;Y20-953-26;X20-954-26;W20-955-26;V20-956-26;U20-957-26;T20-958-26;S20-959-26;R20-960-26;Q20-961-26;P20-962-26;O20-963-26;N20-964-26;M20-965-26;L20-966-26;K20-967-26;J20-968-26;I20-969-26;H20-970-26;G20-971-26;F20-972-26;E20-973-26;D20-974-26;C20-975-26;B20-976-26;A20-977-26;Z20-978-26;Y20-979-26;X20-980-26;W20-981-26;V20-982-26;U20-983-26;T20-984-26;S20-985-26;R20-986-26;Q20-987-26;P20-988-26;O20-989-26;N20-990-26;M20-991-26;L20-992-26;K20-993-26;J20-994-26;I20-995-26;H20-996-26;G20-997-26;F20-998-26;E20-999-26;D20-1000-26;C20-1001-26;B20-1002-26;A20-1003-26;Z20-1004-26;Y20-1005-26;X20-1006-26;W20-1007-26;V20-1008-26;U20-1009-26;T20-1010-26;S20-1011-26;R20-1012-26;Q20-1013-26;P20-1014-26;O20-1015-26;N20-1016-26;M20-1017-26;L20-1018-26;K20-1019-26;J20-1020-26;I20-1021-26;H20-1022-26;G20-1023-26;F20-1024-26;E20-1025-26;D20-1026-26;C20-1027-26;B20-1028-26;A20-1029-26;Z20-1030-26;Y20-1031-26;X20-1032-26;W20-1033-26;V20-1034-26;U20-1035-26;T20-1036-26;S20-1037-26;R20-1038-26;Q20-1039-26;P20-1040-26;O20-1041-26;N20-1042-26;M20-1043-26;L20-1044-26;K20-1045-26;J20-1046-26;I20-1047-26;H20-1048-26;G20-1049-26;F20-1050-26;E20-1051-26;D20-1052-26;C20-1053-26;B20-1054-26;A20-1055-26;Z20-1056-26;Y20-1057-26;X20-1058-26;W20-1059-26;V20-1060-26;U20-1061-26;T20-1062-26;S20-1063-26;R20-1064-26;Q20-1065-26;P20-1066-26;O20-1067-26;N20-1068-26;M20-1069-26;L20-1070-26;K20-1071-26;J20-1072-26;I20-1073-26;H20-1074-26;G20-1075-26;F20-1076-26;E20-1077-26;D20-1078-26;C20-1079-26;B20-1080-26;A20-1081-26;Z20-1082-26;Y20-1083-26;X20-1084-26;W20-1085-26;V20-1086-26;U20-1087-26;T20-1088-26;S20-1089-26;R20-1090-26;Q20-1091-26;P20-1092-26;O20-1093-26;N20-1094-26;M20-1095-26;L20-1096-26;K20-1097-26;J20-1098-26;I20-1099-26;H20-1100-26;G20-1101-26;F20-1102-26;E20-1103-26;D20-1104-26;C20-1105-26;B20-1106-26;A20-1107-26;Z20-1108-26;Y20-1109-26;X20-1110-26;W20-1111-26;V20-1112-26;U20-1113-26;T20-1114-26;S20-1115-26;R20-1116-26;Q20-1117-26;P20-1118-26;O20-1119-26;N20-112



|        |      |      |       |      |       |       |                                                                                                                                                                                                                                                                 |            |
|--------|------|------|-------|------|-------|-------|-----------------------------------------------------------------------------------------------------------------------------------------------------------------------------------------------------------------------------------------------------------------|------------|
| 632.47 | 0.00 | 0.00 | 0.94  | 0.03 | 0.08  | 0.00  | A12-0-142/A12-1-14:1P12-0-14:1P12-1-14-0                                                                                                                                                                                                                        |            |
| 632.47 | 0.00 | 0.00 | 0.94  | 0.03 | 0.08  | 0.00  | A12-0-142/A12-1-14:1P12-0-14:1P12-1-14-0                                                                                                                                                                                                                        |            |
| 728.47 | 0.00 | 0.00 | 0.94  | 0.00 | 0.08  | 0.00  | A16-5-18:5P14-3-20:6P16-4-18:5P16-5-18-4                                                                                                                                                                                                                        |            |
| 728.52 | 0.00 | 0.00 | 0.94  | 0.00 | 0.08  | 0.00  | D12-0-20:3D12-1-20:2D14-0-18:3D14-1-18:2D14-2-18:1D14-3-18:0D16-0-16:3D16-1-16:2                                                                                                                                                                                |            |
| 986.66 | 0.00 | 0.00 | 0.31  | 0.03 | 0.14  | 0.00  | D26-7-26:7                                                                                                                                                                                                                                                      |            |
| 992.71 | 0.00 | 0.01 | 3.19  | 0.03 | 0.09  | 0.00  | D26-4-26:7D26-5-26:6                                                                                                                                                                                                                                            |            |
| 670.44 | 0.00 | 1.05 | 0.58  | 0.00 | 10.57 | 0.23  | D12-0-16:4D12-1-16:3D14-1-14:3D14-2-14-2                                                                                                                                                                                                                        |            |
| 528.35 | 0.00 | 0.58 | 2.50  | 0.04 | 0.07  | 0.00  | A20-5P24-0                                                                                                                                                                                                                                                      |            |
| 986.85 | 0.00 | 0.00 | 0.83  | 0.03 | 0.11  | 0.00  | D24-9-26:0                                                                                                                                                                                                                                                      |            |
| 564.44 | 0.00 | 0.00 | 0.68  | 0.02 | 0.03  | 0.00  | A22-1P22-0                                                                                                                                                                                                                                                      |            |
| 500.31 | 0.00 | 0.00 | 1.75  | 0.04 | 0.16  | 0.00  | A18-5P18-4                                                                                                                                                                                                                                                      |            |
| 582.39 | 0.00 | 1.38 | 0.00  | 0.00 | 2.01  | 0.27  | A24-6P24-5                                                                                                                                                                                                                                                      |            |
| 530.36 | 0.00 | 0.00 | 0.71  | 0.02 | 0.10  | 0.00  | A30-4P20-3                                                                                                                                                                                                                                                      |            |
| 700.49 | 0.00 | 0.00 | 1.82  | 0.02 | 0.09  | 0.00  | D12-0-18:3D12-1-18:2D14-0-16:3D14-1-16:2D14-2-16:1D14-3-16:0                                                                                                                                                                                                    |            |
| 622.44 | 0.00 | 0.00 | 2.44  | 0.01 | 0.00  | 0.00  | D12-0-12:0                                                                                                                                                                                                                                                      |            |
| 596.37 | 0.00 | 0.00 | 0.42  | 0.03 | 0.08  | 0.00  | D24-6                                                                                                                                                                                                                                                           |            |
| 662.51 | 0.00 | 0.01 | 0.98  | 0.03 | 0.14  | 0.00  | A12-0-16:1/A12-1-16:0/A14-0-14:1P12-0-16:0/P14-0-14-0                                                                                                                                                                                                           |            |
| 928.72 | 0.00 | 0.01 | 0.48  | 0.06 | 0.23  | 0.00  | A22-1-26:7/A22-2-26:6/A22-3-26:5/A22-4-26:4/A22-5-26:3/A22-6-26:2/A22-7-26:1/A24-1-24:7/A24-2-24:6/A24-3-24:5/A24-4-24:4/A22-0-26:7P22-1-26:6/P22-2-26:5/P22-3-26:4/P22-4-26:3/P22-5-26:2/P22-6-26:1/P22-7-26:0/P24-0-24:7/P24-1-24:6/P24-2-24:5/P24-3-24:4     |            |
| 622.39 | 0.00 | 0.00 | 2.49  | 0.01 | 0.00  | 0.00  | D26:7                                                                                                                                                                                                                                                           |            |
| 518.32 | 0.00 | 0.00 | 0.74  | 0.03 | 0.07  | 0.00  | D18:3                                                                                                                                                                                                                                                           |            |
| 552.35 | 0.00 | 0.01 | 0.00  | 0.03 | 0.00  | 0.00  | A22-7P22-6                                                                                                                                                                                                                                                      |            |
| 574.39 | 0.00 | 0.01 | 0.57  | 0.01 | 0.06  | 0.00  | D22:3                                                                                                                                                                                                                                                           |            |
| 588.44 | 0.00 | 0.00 | 0.38  | 0.03 | 0.18  | 0.00  | A24-3P24-2                                                                                                                                                                                                                                                      |            |
| 954.73 | 0.00 | 0.00 | 1.48  | 0.06 | 0.00  | 0.00  | A24-2-26:7/A24-3-26:6/A24-4-26:5/A24-5-26:4/A24-6-26:3/A24-7-26:2/P24-1-26:7/P24-2-26:6/P24-3-26:5/P24-4-26:4/P24-5-26:3/P24-6-26:2/P24-7-26:1                                                                                                                  |            |
| 568.34 | 0.00 | 0.00 | 1.15  | 0.03 | 0.15  | 0.00  | D22-6                                                                                                                                                                                                                                                           |            |
| 954.79 | 0.00 | 0.00 | 1.22  | 0.05 | 0.00  | 0.00  | D22-9-26:0/D22-1-26:1/D22-2-26:0/D24-0-24:2/D24-1-24:1                                                                                                                                                                                                          |            |
| 994.86 | 0.00 | 0.01 | 2.77  | 0.04 | 0.09  | 0.00  | A26-0-26:3/A26-1-26:2/P26-0-26:2/P26-1-26:1                                                                                                                                                                                                                     |            |
| 924.68 | 0.00 | 0.01 | 2.65  | 0.02 | 0.08  | 0.01  | A22-3-26:7/A22-4-26:6/A22-5-26:5/A22-6-26:4/A22-7-26:3/A24-3-24:7/A24-4-24:6/A24-5-24:5/P22-2-26:7P22-3-26:6/P22-4-26:5/P22-5-26:4/P22-6-26:3/P22-7-26:2/P24-2-24:7/P24-3-24:6/P24-4-24:5                                                                       |            |
| 490.29 | 0.00 | 0.01 | 0.43  | 0.06 | 0.13  | 0.00  | D16:3                                                                                                                                                                                                                                                           |            |
| 600.40 | 0.00 | 0.01 | 1.74  | 0.07 | 0.11  | 0.00  | D24-4                                                                                                                                                                                                                                                           |            |
| 924.74 | 0.00 | 0.01 | 2.63  | 0.02 | 0.08  | 0.01  | D20-0-26:3/D20-1-26:2/D20-2-26:1/D20-3-26:0/D22-0-24:3/D22-1-24:2/D22-2-24:1/D22-3-24:0                                                                                                                                                                         |            |
| 566.32 | 0.00 | 0.00 | 0.84  | 0.02 | 0.06  | 0.00  | D22:7                                                                                                                                                                                                                                                           |            |
| 900.68 | 0.00 | 0.00 | 0.00  | 0.01 | 0.00  | 0.00  | A20-1-26:7/A20-2-26:6/A20-3-26:5/A20-4-26:4/A20-5-26:3/A20-6-26:2/A22-1-24:7/A22-2-24:6/A22-3-24:5/A22-4-24:4/A22-5-24:3/A22-6-24:2/A22-7-24:1/P20-0-26:7/P20-1-26:6/P20-2-26:5/P20-3-26:4/P20-4-26:3/P20-5-26:2/P20-6-26:1/P22-0-24:7/P22-1-24:6/P22-2-24:5/P2 |            |
| 630.45 | 0.00 | 0.00 | 0.72  | 0.04 | 0.16  | 0.00  | A12-0-14:3/A12-1-14:2/P12-0-14:2/P12-1-14:1                                                                                                                                                                                                                     |            |
| 630.45 | 0.00 | 0.00 | 0.72  | 0.04 | 0.16  | 0.00  | A12-0-14:3/A12-1-14:2/P12-0-14:2/P12-1-14:1                                                                                                                                                                                                                     |            |
| 890.66 | 0.00 | 0.01 | 0.00  | 0.02 | 0.01  | 0.00  | D18-0-26:6/D18-1-26:5/D18-2-26:4/D18-3-26:3/D18-4-26:2/D18-5-26:1/D20-0-24:6/D20-1-24:5/D20-2-24:4/D20-3-24:3/D20-4-24:2/D20-5-24:1/D20-6-24:0/D22-0-22:6/D22-1-22:5/D22-2-22:4/D22-3-22:3                                                                      |            |
| 900.74 | 0.00 | 0.00 | 0.00  | 0.01 | 0.00  | 0.00  | D18-0-26:6/D18-1-26:5/D20-0-24:1/D20-1-24:0/D22-0-22:1                                                                                                                                                                                                          |            |
| 986.79 | 0.00 | 0.00 | 0.83  | 0.03 | 0.11  | 0.00  | A26-0-26:7/A26-1-26:6/A26-2-26:5/A26-3-26:4/P26-0-26:6/P26-1-26:5/P26-2-26:4/P26-3-26:3                                                                                                                                                                         |            |
| 698.48 | 0.00 | 0.00 | 0.82  | 0.00 | 0.15  | 0.00  | D12-0-18:4D12-1-18:3D14-0-16:4D14-1-16:3D14-2-16:2D14-3-16:1                                                                                                                                                                                                    |            |
| 850.54 | 0.00 | 0.01 | 1.95  | 0.01 | 0.13  | 0.00  | D16-5-26:7/D18-5-24:7/D20-5-22:7/D20-6-22:6                                                                                                                                                                                                                     |            |
| 504.35 | 0.00 | 0.00 | 0.89  | 0.02 | 0.12  | 0.00  | A18-3P18-2                                                                                                                                                                                                                                                      |            |
| 740.36 | 0.00 | 0.00 | 0.64  | 0.00 | 0.14  | 0.00  | A12-0-22:4/A12-1-22:3/A14-0-20:4/A14-1-20:3/A14-2-20:2/A14-3-20:1/A16-0-18:0/A16-1-18:3/A16-2-18:2/A16-3-18:1/A16-4-18:0/P12-0-22:3/P12-1-22:2/P14-0-20:3/P14-1-20:2/P14-2-20:1/P14-3-20:0/P16-0-18:3/P16-1-18:2/P16-2-18:1/P16-3-18:0                          |            |
| 542.32 | 0.00 | 0.00 | 0.00  | 0.00 | 0.00  | 0.00  | D20:5                                                                                                                                                                                                                                                           |            |
| 688.53 | 0.00 | 0.00 | 0.05  | 0.02 | 0.01  | 0.00  | A12-0-18:2/A12-1-18:1/A14-0-16:2/A14-1-16:1/A14-2-16:0/P12-0-18:1/P12-1-18:0/P14-0-16:1/P14-1-16:0                                                                                                                                                              |            |
| 982.76 | 0.00 | 0.00 | 2.14  | 0.03 | 0.23  | 0.00  | A26-3-26:7/A26-3-26:6/A26-4-26:5/P26-1-26:7/P26-2-26:6/P26-3-26:5/P26-4-26:4                                                                                                                                                                                    |            |
| 982.82 | 0.00 | 0.00 | 2.10  | 0.03 | 0.23  | 0.00  | D24-0-26:2/D24-1-26:1/D24-2-26:0                                                                                                                                                                                                                                |            |
| 624.40 | 0.00 | 0.00 | 1.08  | 0.53 | 0.15  | 0.00  | D26:8                                                                                                                                                                                                                                                           |            |
| 920.65 | 0.00 | 0.00 | 1.47  | 0.03 | 0.29  | 0.00  | A22-5-26:7/A22-6-26:6/A22-7-26:5/A24-5-24:7/A24-6-24:6/P22-4-26:7/P22-5-26:6/P22-6-26:5/P22-7-26:4/P24-4-24:7/P24-5-24:6                                                                                                                                        |            |
| 920.71 | 0.00 | 0.00 | 1.45  | 0.03 | 0.28  | 0.00  | D20-0-26:5/D20-1-26:4/D20-2-26:3/D20-3-26:2/D20-4-26:1/D20-5-26:0/D22-0-24:5/D22-1-24:4/D22-2-24:3/D22-3-24:2/D22-4-24:1/D22-5-24:0                                                                                                                             |            |
| 492.31 | 0.00 | 0.00 | 26.32 | 0.03 | 0.09  | 0.00  | D16:2                                                                                                                                                                                                                                                           |            |
| 602.42 | 0.00 | 0.01 | 0.84  | 0.03 | 0.20  | 0.00  | P12-1-12:1                                                                                                                                                                                                                                                      |            |
| 602.42 | 0.00 | 0.01 | 0.84  | 0.03 | 0.20  | 0.00  | P12-1-12:1                                                                                                                                                                                                                                                      |            |
| 616.47 | 0.00 | 0.00 | 0.37  | 0.01 | 0.04  | 0.00  | A26-3P26:2                                                                                                                                                                                                                                                      |            |
| 978.79 | 0.00 | 0.00 | 0.00  | 0.03 | 0.05  | 0.00  | D24-0-26:4/D24-1-26:3/D24-2-26:2/D24-3-26:1/D24-4-26:0                                                                                                                                                                                                          |            |
| 472.28 | 0.00 | 0.01 | 0.00  | 0.05 | 0.15  | 0.00  | A16-5P16-4                                                                                                                                                                                                                                                      |            |
| 464.28 | 0.00 | 0.00 | 0.00  | 0.01 | 0.10  | 0.00  | D14:2                                                                                                                                                                                                                                                           |            |
| 962.79 | 0.00 | 0.01 | 1.21  | 0.03 | 0.02  | 0.00  | A24-0-26:5/A24-1-26:4/A24-2-26:3/A24-3-26:2/A24-4-26:1/A24-5-26:0/P24-0-26:4/P24-1-26:3/P24-2-26:2/P24-3-26:1/P24-4-26:0                                                                                                                                        |            |
| 932.75 | 0.00 | 0.01 | 0.53  | 0.02 | 0.20  | 0.00  | A22-9-26:0/A22-1-26:5/A22-2-26:4/A22-3-26:3/A22-4-26:2/A22-5-26:1/A22-6-26:0/A24-0-24:6/A24-1-24:5/A24-2-24:4/A24-3-24:3/P22-0-26:5/P22-1-26:4/P22-2-26:3/P22-3-26:2/P22-4-26:1/P22-5-26:0/P24-0-24:5/P24-1-24:4/P24-2-24:3                                     |            |
| 966.70 | 0.00 | 0.00 | 3.51  | 0.00 | 0.08  | 0.00  | D24-9-26:0/D24-4-26:6/D24-5-26:5/D24-6-26:4/D24-7-26:3                                                                                                                                                                                                          |            |
| 452.31 | 0.00 | 0.00 | 1.62  | 0.03 | 0.07  | 0.00  | A14-1P14-0                                                                                                                                                                                                                                                      |            |
| 928.77 | 0.00 | 0.00 | 0.99  | 0.06 | 0.21  | 0.00  | D20-0-26:1/D20-1-26:0/D22-0-24:1/D22-1-24:0                                                                                                                                                                                                                     |            |
| 486.26 | 0.00 | 0.00 | 0.37  | 0.04 | 0.13  | 0.00  | D16:5                                                                                                                                                                                                                                                           |            |
| 592.47 | 0.00 | 0.00 | 1.55  | 0.00 | 0.08  | 0.00  | A24-1P24-0                                                                                                                                                                                                                                                      |            |
| 476.31 | 0.00 | 0.01 | 1.45  | 0.02 | 0.10  | 0.00  | A16-3P16-2                                                                                                                                                                                                                                                      |            |
| 614.45 | 0.00 | 0.00 | 1.52  | 0.07 | 0.08  | 0.00  | A26-4P26-3                                                                                                                                                                                                                                                      |            |
| 884.62 | 0.00 | 0.00 | 0.98  | 0.02 | 0.07  | 0.00  | D18-2-26:7/D18-3-26:6/D18-4-26:5/D18-5-26:4/D20-2-24:7/D20-3-24:6/D20-4-24:5/D20-5-24:4/D20-6-24:3/D22-2-22:7/D22-3-22:6/D22-4-22:5                                                                                                                             |            |
| 884.75 | 0.00 | 0.00 | 0.00  | 0.02 | 0.09  | 0.00  | A18-0-26:2/A18-1-26:1/A18-2-26:0/A20-0-24:2/A20-1-24:1/A20-2-24:0/A22-0-22:2/A22-1-22:1/P18-0-26:1/P18-1-26:0/P20-0-24:1/P20-1-24:0/P22-0-22:1                                                                                                                  |            |
| 842.66 | 0.00 | 0.00 | 0.00  | 0.03 | 0.22  | 0.00  | D14-0-26:2/D14-1-26:1/D14-2-26:0/D16-0-24:2/D16-1-24:1/D16-2-24:0/D18-0-22:2/D18-1-22:1/D18-2-22:0/D20-0-20:2/D20-1-20:1                                                                                                                                        |            |
| 556.38 | 0.00 | 0.01 | 0.69  | 0.03 | 0.08  | 0.00  | A22-5P22-4                                                                                                                                                                                                                                                      |            |
| 682.48 | 0.00 | 0.00 | 1.50  | 0.05 | 0.05  | 0.00  | A12-0-18:5/A12-1-18:4/A14-0-16:5/A14-1-16:4/A14-2-16:3/A14-3-16:2/P12-0-18:4/P12-1-18:3/P14-0-16:4/P14-1-16:3/P14-2-16:2/P14-3-16:1                                                                                                                             |            |
| 516.31 | 0.00 | 0.00 | 0.27  | 0.03 | 0.01  | 0.00  | D18:4                                                                                                                                                                                                                                                           |            |
| 956.75 | 0.00 | 0.00 | 1.35  | 0.03 | 0.08  | 0.00  | A24-1-26:7/A24-2-26:6/A24-3-26:5/A24-4-26:4/A24-5-26:3/A24-6-26:2/A24-7-26:1/P24-0-26:7/P24-1-26:6/P24-2-26:5/P24-3-26:4/P24-4-26:3/P24-5-26:2/P24-6-26:1/P24-7-26:0                                                                                            |            |
| 910.83 | 0.00 | 0.00 | 0.72  | 0.03 | 0.00  | 0.00  | D20-3-26:7/D20-4-26:6/D20-5-26:5/D20-6-26:4/D22-3-24:7/D22-4-24:6/D22-5-24:5/D22-6-24:4/D22-7-24:3                                                                                                                                                              |            |
| 908.75 | 0.00 | 0.00 | 0.69  | 0.01 | 0.22  | 0.00  | A20-0-26:4/A20-1-26:3/A20-2-26:2/A20-3-26:1/A20-4-26:0/A22-0-24:4/A22-1-24:3/A22-2-24:2/A22-3-24:1/A22-4-24:0/P20-0-26:3/P20-1-26:2/P20-2-26:1/P20-3-26:0/P22-0-24:3/P22-1-24:2/P22-2-24:1/P22-3-24:0                                                           |            |
| 714.41 | 0.00 | 0.01 | 1.78  | 0.05 | 1.78  | 62.50 | 0.00                                                                                                                                                                                                                                                            | D16:5-18:5 |
| 916.81 | 0.00 | 0.01 | 1.01  | 0.09 | 0.23  | 0.00  | A20-0-26:0/A22-0-24:0                                                                                                                                                                                                                                           |            |
| 902.76 | 0.00 | 0.00 | 1.45  | 0.02 | 0.17  | 0.00  | D18-0-26:0/D20-0-24:0/D22-0-22:0                                                                                                                                                                                                                                |            |
| 548.37 | 0.00 | 0.00 | 0.23  | 0.03 | 0.14  | 0.00  | D20:2                                                                                                                                                                                                                                                           |            |
| 902.57 | 0.00 | 0.00 | 2.28  | 0.02 | 0.00  | 0.00  | D22-7-24:7                                                                                                                                                                                                                                                      |            |
| 902.70 | 0.00 | 0.00 | 1.40  | 0.02 | 0.00  | 0.00  | A20-0-26:7/A20-1-26:6/A20-2-26:5/A20-3-26:4/A20-4-26:3/A20-5-26:2/A20-6-26:1/A22-0-24:7/A22-1-24:6/A22-2-24:5/A22-3-24:4/A22-4-24:3/A22-5-24:2/A22-6-24:1/A22-7-24:0/P20-0-26:6/P20-1-26:5/P20-2-26:4/P20-3-26:3/P20-4-26:2/P20-5-26:1/P20-6-26:0/P22-0-24:6/P2 |            |
| 660.50 | 0.00 | 0.00 | 1.16  | 0.03 | 0.16  | 0.00  | A12-0-16:2/A12-1-16:1/A14-0-14:2/A14-1-14:1/P12-0-16:1/P12-1-16:0/P14-0-14:1                                                                                                                                                                                    |            |
| 980.80 | 0.00 | 0.01 | 2.20  | 0.02 | 0.00  | 0.00  | D24-0-26:3/D24-1-26:2/D24-2-26:1/D24-3-26:0                                                                                                                                                                                                                     |            |
| 978.73 | 0.00 | 0.00 | 0.00  | 0.05 | 0.10  | 0.00  | A26-4-26:7/A26-5-26:6/P26-3-26:7/P26-4-26:6/P26-5-26:5                                                                                                                                                                                                          |            |
| 462.26 | 0.00 | 0.00 | 1.65  | 0.00 | 0.09  | 0.00  | D14:3                                                                                                                                                                                                                                                           |            |
| 994.73 | 0.00 | 0.01 | 0.90  | 0.02 | 0.08  | 0.00  | D26-3-26:7/D26-4-26:6/D26-5-26:5                                                                                                                                                                                                                                |            |
| 862.63 | 0.00 | 0.00 | 0.50  | 0.02 | 0.02  | 0.00  | D16-0-26:6/D16-1-26:5/D16-2-26:4/D16-3-26:3/D16-4-26:2/D16-5-26:1/D18-0-24:6/D18-1-24:5/D18-2-24:4/D18-3-24:3/D18-4-24:2/D18-5-24:1/D20-0-22:6/D20-1-22:5/D20-2-22:4/D20-3-22:3/D20-4-22:2/D20-5-22:1/D20-6-22:0                                                |            |
| 424.28 | 0.00 | 0.01 | 1.03  | 0.03 | 0.06  | 0.00  | A12-1P12-0                                                                                                                                                                                                                                                      |            |
| 862.58 | 0.00 | 0.00 | 0.48  | 0.02 | 0.02  | 0.01  | A20-6-24:7/A22-6-22:7/P18-5-26:7/P20-5-24:7/P20-6-24:6/P22-5-22:7/P22-6-22:6                                                                                                                                                                                    |            |
| 686.51 | 0.00 | 0.00 | 1.55  | 0.02 | 0.05  | 0.00  | A12-0-18:3/A12-1-18:2/A14-0-18:3/A14-1-18:2/A14-2-18:1/A14-3-18:0/P12-0-18:2/P12-1-18:1/P14-0-18:2/P14-1-18:1/P14-2-18:0                                                                                                                                        |            |
| 934.76 | 0.00 | 0.00 | 1.89  | 0.00 | 0.04  | 0.00  | A22-9-26:5/A22-1-26:4/A22-2-26:3/A22-3-26:2/A22-4-26:1/A22-5-26:0/A24-0-24:5/A24-1-24:4/A24-2-24:3/P22-0-26:4/P22-1-26:3/P22-2-26:2/P22-3-26:1/P22-4-26:0/P24-0-24:4/P24-1-24:3/P24-2-24:2                                                                      |            |
| 908.62 | 0.00 | 0.01 | 0.69  | 0.01 | 0.22  | 0.00  | D20-4-26:7/D20-5-26:6/D20-6-26:5/D22-4-24:7/D22-5-24:6/D22-6-24:5/D22-7-24:4                                                                                                                                                                                    |            |
| 606.45 | 0.00 | 0.01 | 2.31  | 0.05 | 0.00  | 0.00  | A12-0-12:1/P12-0-12:0                                                                                                                                                                                                                                           |            |
| 606.45 | 0.00 | 0.01 | 2.31  | 0.05 | 0.00  | 0.00  | A12-0-12:1/P12-0-12:0                                                                                                                                                                                                                                           |            |
| 856.72 | 0.00 | 0.01 | 0.91  | 0.03 | 0.01  | 0.00  | A16-0-26:2/A16-1-26:1/A16-2-26:0/A18-0-24:2/A18-1-24:1/A18-2-24:0/A20-0-22:2/A20-1-22:1/A20-2-22:0/P16-0-26:1/P16-1-26:0/P18-0-24:1/P18-1-24:0/P20-0-22:1/P20-1-22:0                                                                                            |            |
| 550.39 | 0.00 | 0.01 | 1.60  | 0.02 | 0.11  | 0.00  | D20:1                                                                                                                                                                                                                                                           |            |

|        |      |       |        |      |       |      |                                                                                                                                                                                                                                                              |
|--------|------|-------|--------|------|-------|------|--------------------------------------------------------------------------------------------------------------------------------------------------------------------------------------------------------------------------------------------------------------|
| 448.28 | 0.00 | 0.01  | 0.99   | 0.01 | 0.15  | 0.00 | A14:3P14:2                                                                                                                                                                                                                                                   |
| 606.39 | 0.00 | 0.01  | 2.33   | 0.05 | 0.00  | 0.00 | P26:7                                                                                                                                                                                                                                                        |
| 508.38 | 0.00 | 0.01  | 0.39   | 0.02 | 0.15  | 0.00 | A18:1P18:0                                                                                                                                                                                                                                                   |
| 572.37 | 0.00 | 0.00  | 1.81   | 0.01 | 0.00  | 0.00 | D22:4                                                                                                                                                                                                                                                        |
| 646.44 | 0.00 | 0.00  | 0.00   | 0.02 | 0.09  | 0.00 | D12:0-14:2D12:1-14:1                                                                                                                                                                                                                                         |
| 566.45 | 0.00 | 0.00  | 0.85   | 0.00 | 0.08  | 0.00 | A22:0                                                                                                                                                                                                                                                        |
| 892.68 | 0.00 | 0.00  | 0.94   | 0.05 | 0.05  | 0.01 | D18:0-26:5D18:1-26:4D18:2-26:3D18:3-26:2D18:4-26:1D18:5-26:0D20:0-24:5D20:1-24:4D20:2-24:3D20:3-24:2D20:4-24:1D20:5-24:0D22:0-22:5D22:1-22:2D22-22:3                                                                                                         |
| 726.51 | 0.00 | 0.00  | 1.72   | 0.05 | 0.24  | 0.00 | D12:0-20:4D12:1-20:3D14:0-18:4D14:1-18:3D14:2-18:2D14:3-18:1D16:0-16:4D16:1-16:3D16:2-16:2                                                                                                                                                                   |
| 538.42 | 0.00 | 0.34  | 0.00   | 0.00 | 0.55  | 0.00 | A20:0                                                                                                                                                                                                                                                        |
| 726.45 | 0.00 | 0.00  | 1.59   | 0.05 | 0.24  | 0.00 | P16:5-18:5                                                                                                                                                                                                                                                   |
| 972.87 | 0.00 | 0.01  | 2.22   | 0.01 | 0.00  | 0.00 | A24:0-26:0                                                                                                                                                                                                                                                   |
| 610.42 | 0.00 | 0.01  | 1.12   | 0.02 | 0.26  | 0.00 | A26:6P26:5                                                                                                                                                                                                                                                   |
| 590.45 | 0.00 | 0.01  | 1.99   | 0.00 | 0.04  | 0.00 | A24:2P24:1                                                                                                                                                                                                                                                   |
| 520.34 | 0.00 | 0.01  | 0.39   | 0.12 | 1.77  | 0.00 | D18:2                                                                                                                                                                                                                                                        |
| 584.41 | 0.00 | 0.06  | 0.71   | 0.00 | 0.00  | 0.00 | A24:5P24:4                                                                                                                                                                                                                                                   |
| 858.54 | 0.00 | 0.01  | 1.99   | 0.00 | 0.13  | 0.00 | P22:7-22:7                                                                                                                                                                                                                                                   |
| 858.60 | 0.00 | 0.01  | 1.45   | 0.00 | 0.13  | 0.00 | D16:1-26:7D16:2-26:6D16:3-26:5D16:4-26:4D16:5-26:3D18:1-24:7D18:2-24:6D18:3-24:5D18:4-24:4D18:5-24:3D20:1-22:7D20:2-22:6D20:3-22:5D20:4-22:4D20:5-22:3D20:6-22:2                                                                                             |
| 988.68 | 0.00 | 0.00  | 1.77   | 0.02 | 0.19  | 0.00 | D26:6-26:7                                                                                                                                                                                                                                                   |
| 658.48 | 0.00 | 0.01  | 1.45   | 0.06 | 0.11  | 0.00 | A12:0-16:3A12:1-16:2A14:0-14:3A14:1-14:2P12:0-16:2P12:1-16:1P14:0-14:2P14:1-14:1                                                                                                                                                                             |
| 626.42 | 0.00 | 0.76  | 0.00   | 0.00 | 12.98 | 0.01 | P12:1-14:3                                                                                                                                                                                                                                                   |
| 626.42 | 0.00 | 0.76  | 0.00   | 0.00 | 12.98 | 0.01 | P12:1-14:3                                                                                                                                                                                                                                                   |
| 536.41 | 0.00 | 0.00  | 61.26  | 1.99 | 0.18  | 0.00 | A20:1P20:0                                                                                                                                                                                                                                                   |
| 886.76 | 0.00 | 0.00  | 2.74   | 0.00 | 0.00  | 0.31 | A18:0-26:1A18:1-26:0A20:0-24:1A20:1-24:0A22:0-22:1P18:0-26:0P20:0-24:0P22:0-22:0                                                                                                                                                                             |
| 886.63 | 0.00 | 0.00  | 2.53   | 0.00 | 0.05  | 0.31 | D18:1-26:7D18:2-26:6D18:3-26:5D18:4-26:4D18:5-26:3D20:1-24:7D20:2-24:6D20:3-24:5D20:4-24:4D20:5-24:3D20:6-24:2D22:1-22:7D22:2-22:6D22:3-22:5D22:4-22:4                                                                                                       |
| 858.73 | 0.00 | 0.00  | 1.56   | 0.00 | 0.13  | 0.00 | A16:0-26:1A16:1-26:0A18:0-24:1A18:1-24:0A20:0-22:1A20:1-22:0P16:0-26:0P18:0-24:0P20:0-22:0                                                                                                                                                                   |
| 680.47 | 0.00 | 0.00  | 1.15   | 0.03 | 0.11  | 0.00 | A12:1-16:5A14:1-16:5A14:2-16:4A14:3-16:3P12:0-18:5P12:1-18:4P14:0-16:5P14:1-16:4P14:2-16:3P14:3-16:2                                                                                                                                                         |
| 474.30 | 0.00 | 0.01  | 0.71   | 0.04 | 0.08  | 0.00 | A16:4P16:3                                                                                                                                                                                                                                                   |
| 514.29 | 0.00 | 0.00  | 0.94   | 0.04 | 0.14  | 0.00 | D18:5                                                                                                                                                                                                                                                        |
| 438.26 | 0.00 | 0.00  | 0.28   | 0.01 | 0.07  | 0.00 | D12:1                                                                                                                                                                                                                                                        |
| 880.59 | 0.00 | 0.01  | 2.55   | 0.02 | 0.14  | 0.00 | D18:4-26:7D18:5-26:6D20:4-24:7D20:5-24:6D20:6-24:5D22:4-22:7D22:5-22:6                                                                                                                                                                                       |
| 870.64 | 0.00 | 0.01  | 2.07   | 0.00 | 0.16  | 0.00 | A18:2-26:7A18:3-26:6A18:4-26:5A18:5-26:4A20:2-24:7A20:3-24:6A20:4-24:5A20:5-24:4A20:6-24:3A22:2-22:7A22:3-22:6A22:4-22:5P18:1-26:7P18:2-26:6P18:3-26:5P18:4-26:4P18:5-26:3P20:1-24:7P20:2-24:6P20:3-24:5P20:4-24:4P20:5-24:3P20:6-24:2P2                     |
| 672.46 | 0.00 | 0.00  | 0.09   | 0.00 | 0.00  | 0.00 | D12:0-16:3D12:1-16:2D14:0-14:3D14:1-14:2                                                                                                                                                                                                                     |
| 886.58 | 0.00 | 0.00  | 2.55   | 0.00 | 0.04  | 0.32 | P22:7-24:7                                                                                                                                                                                                                                                   |
| 964.81 | 0.00 | 0.01  | 0.63   | 0.00 | 0.25  | 0.00 | A24:0-26:4A24:1-26:3A24:2-26:2A24:3-26:1A24:4-26:0P24:0-26:3P24:1-26:2P24:2-26:1P24:3-26:0                                                                                                                                                                   |
| 618.49 | 0.00 | 0.01  | 0.71   | 0.01 | 0.05  | 0.00 | A26:2P26:1                                                                                                                                                                                                                                                   |
| 950.76 | 0.00 | 0.00  | 1.36   | 0.03 | 0.12  | 0.00 | D22:0-26:4D22:1-26:3D22:2-26:2D22:3-26:1D22:4-26:0D24:0-24:4D24:1-24:3D24:2-24:2                                                                                                                                                                             |
| 618.41 | 0.00 | 0.01  | 0.74   | 0.01 | 0.13  | 0.00 | D12:1-12:1                                                                                                                                                                                                                                                   |
| 426.30 | 0.00 | 0.01  | 1.08   | 0.00 | 0.05  | 0.00 | A12:0                                                                                                                                                                                                                                                        |
| 980.75 | 0.00 | 0.01  | 2.34   | 0.03 | 0.00  | 0.00 | A26:3-26:7A26:4-26:6A26:5-26:5P26:2-26:7P26:3-26:6P26:4-26:5                                                                                                                                                                                                 |
| 950.70 | 0.00 | 0.00  | 1.37   | 0.03 | 0.12  | 0.00 | A24:4-26:7A24:5-26:6A24:6-26:5A24:7-26:4P24:3-26:7P24:4-26:6P24:5-26:5P24:6-26:4P24:7-26:3                                                                                                                                                                   |
| 910.76 | 0.00 | 0.01  | 0.71   | 0.00 | 0.00  | 0.00 | A20:0-26:3A20:1-26:2A20:2-26:1A20:3-26:0A22:0-24:3A22:1-24:2A22:2-24:1A22:3-24:0P20:0-26:2P20:1-26:1P20:2-26:0P22:0-24:2P22:1-24:1P22:2-24:0                                                                                                                 |
| 948.74 | 0.00 | 0.01  | 2.33   | 0.00 | 0.00  | 0.00 | D22:3-26:5D22:1-26:4D22:2-26:3D22:3-26:2D22:4-26:1D22:5-26:0D24:0-24:5D24:1-24:4D24:2-24:3                                                                                                                                                                   |
| 480.35 | 0.00 | 0.08  | 1.50   | 0.01 | 0.04  | 0.19 | A16:1P16:0                                                                                                                                                                                                                                                   |
| 550.33 | 0.00 | 0.01  | 1.64   | 0.02 | 0.11  | 0.00 | P22:7                                                                                                                                                                                                                                                        |
| 948.68 | 0.00 | 0.01  | 2.34   | 0.00 | 0.00  | 0.00 | A24:5-26:7A24:6-26:6A24:7-26:5P24:4-26:7P24:5-26:6P24:6-26:5P24:7-26:4                                                                                                                                                                                       |
| 856.59 | 0.00 | 0.00  | 0.12   | 0.02 | 0.01  | 0.00 | D16:2-26:7D16:3-26:6D16:4-26:5D16:5-26:4D18:2-24:7D18:3-24:6D18:4-24:5D18:5-24:4D20:2-22:7D20:3-22:6D20:4-22:5D20:5-22:4D20:6-22:3                                                                                                                           |
| 842.61 | 0.00 | 0.00  | 0.00   | 0.03 | 0.13  | 0.00 | A16:2-26:7A16:3-26:6A16:4-26:5A16:5-26:4A18:2-24:7A18:3-24:6A18:4-24:5A18:5-24:4A20:2-22:7A20:3-22:6A20:4-22:5A20:5-22:4A20:6-22:3P16:1-26:7P16:2-26:6P16:3-26:5P16:4-26:4P16:5-26:3P18:1-24:7P18:2-24:6P18:3-24:5P18:4-24:4P18:5-24:3P2                     |
| 972.74 | 0.00 | 0.01  | 1.14   | 0.01 | 0.02  | 0.01 | D24:0-26:7D24:1-26:6D24:2-26:5D24:3-26:4D24:4-26:3D24:5-26:2D24:6-26:1D24:7-26:0                                                                                                                                                                             |
| 968.71 | 0.00 | 0.00  | 0.05   | 0.04 | 0.34  | 0.00 | D24:2-26:7D24:3-26:6D24:4-26:5D24:5-26:4D24:6-26:3D24:7-26:2                                                                                                                                                                                                 |
| 972.68 | 0.00 | 0.01  | 1.11   | 0.01 | 0.02  | 0.01 | A26:7-26:7P26:6-26:7                                                                                                                                                                                                                                         |
| 752.52 | 0.00 | 0.00  | 0.91   | 0.03 | 0.20  | 0.00 | D12:0-22:5D12:1-22:4D14:0-20:5D14:1-20:4D14:2-20:3D14:3-20:2D16:0-18:5D16:1-18:4D16:2-18:3D16:3-18:2D16:4-18:1D16:5-18:0                                                                                                                                     |
| 696.46 | 0.00 | 0.02  | 0.84   | 0.00 | 0.09  | 0.00 | D12:0-18:5D12:1-18:4D14:0-16:5D14:1-16:4D14:2-16:3D14:3-16:2                                                                                                                                                                                                 |
| 966.83 | 0.00 | 0.00  | 2.86   | 0.00 | 0.08  | 0.00 | A24:0-26:3A24:1-26:2A24:2-26:1A24:3-26:0P24:0-26:2P24:1-26:1P24:2-26:0                                                                                                                                                                                       |
| 586.42 | 0.00 | 0.00  | 2.16   | 0.04 | 0.17  | 0.01 | A24:4P24:3                                                                                                                                                                                                                                                   |
| 668.43 | 0.00 | 0.00  | 8.73   | 0.04 | 0.07  | 0.00 | D12:0-16:5D12:1-16:4D14:2-14:3                                                                                                                                                                                                                               |
| 570.36 | 0.00 | 0.01  | 0.80   | 0.02 | 0.21  | 0.00 | D22:5                                                                                                                                                                                                                                                        |
| 752.47 | 0.00 | 0.00  | 0.90   | 0.03 | 0.21  | 0.00 | P16:5-20:6                                                                                                                                                                                                                                                   |
| 932.62 | 0.00 | 0.00  | 0.00   | 0.02 | 0.21  | 0.00 | D22:6-26:7D22:7-26:6D24:6-24:7                                                                                                                                                                                                                               |
| 446.27 | 0.00 | 0.00  | 0.81   | 0.03 | 0.10  | 0.00 | P14:3                                                                                                                                                                                                                                                        |
| 608.47 | 0.00 | 0.01  | 1.53   | 0.03 | 0.00  | 0.00 | A12:0-12:0                                                                                                                                                                                                                                                   |
| 608.47 | 0.00 | 0.01  | 1.53   | 0.03 | 0.00  | 0.00 | A12:0-12:0                                                                                                                                                                                                                                                   |
| 892.62 | 0.00 | 0.00  | 0.23   | 0.00 | 0.05  | 0.01 | A20:5-26:7A20:6-26:6A22:5-24:7A22:6-24:6A22:7-24:5P20:4-26:7P20:5-26:6P20:6-26:5P22:4-24:7P22:5-24:6P22:6-24:5P22:7-24:4                                                                                                                                     |
| 608.41 | 0.00 | 0.01  | 1.61   | 0.03 | 0.00  | 0.00 | A26:7P26:6                                                                                                                                                                                                                                                   |
| 702.51 | 0.00 | 1.20  | 200.10 | 4.00 | 10.50 | 0.00 | D12:0-18:2D12:1-18:1D14:0-16:2D14:1-16:1D14:2-16:0                                                                                                                                                                                                           |
| 702.45 | 0.00 | 1.24  | 132.72 | 3.95 | 11.35 | 0.00 | A16:4-16:5P14:3-18:5P16:3-16:5P16:4-16:4                                                                                                                                                                                                                     |
| 580.38 | 0.00 | 0.00  | 35.51  | 1.55 | 0.19  | 0.00 | A24:7P24:6                                                                                                                                                                                                                                                   |
| 580.43 | 0.00 | 0.00  | 34.77  | 1.52 | 0.19  | 0.00 | D22:0                                                                                                                                                                                                                                                        |
| 814.58 | 0.00 | 10.78 | 13.60  | 0.00 | 27.31 | 0.00 | A14:2-26:7A14:3-26:6A16:2-24:7A16:3-24:6A16:4-24:5A16:5-24:4A16:6-22:7A16:7-22:6A18:2-22:6A18:3-22:6A18:4-22:5A18:5-22:4A20:0-20:6A20:4-20:5P14:1-26:7P14:2-26:6P14:3-26:5P16:1-24:7P16:2-24:6P16:3-24:5P16:4-24:4P16:5-24:3P18:1-22:7P18:2-22:6P18:3-22:5P1 |
| 846.64 | 0.00 | 0.01  | 3.24   | 0.00 | 0.26  | 0.02 | A16:0-26:7A16:1-26:6A16:2-26:5A16:3-26:4A16:4-26:3A16:5-26:2A18:0-24:7A18:1-24:6A18:2-24:5A18:3-24:4A18:4-24:3A18:5-24:2A20:0-22:7A20:1-22:6A20:2-22:5A20:3-22:4A20:4-22:3A20:5-22:2A20:6-22:1P16:0-26:6P16:1-26:5P16:2-26:4P16:3-26:3P1                     |
| 846.70 | 0.00 | 0.01  | 3.18   | 0.00 | 0.26  | 0.03 | D14:0-26:0D16:0-24:0D18:0-22:0D20:0-20:0                                                                                                                                                                                                                     |
| 724.49 | 0.00 | 0.00  | 2.95   | 0.00 | 0.10  | 0.00 | D12:0-20:5D12:1-20:4D14:0-18:5D14:1-18:4D14:2-18:3D14:3-18:2D16:0-16:5D16:1-16:4D16:2-16:3                                                                                                                                                                   |
| 976.77 | 0.00 | 0.01  | 2.91   | 0.06 | 0.15  | 0.00 | D24:0-26:5D24:1-26:4D24:2-26:3D24:3-26:2D24:4-26:1D24:5-26:0                                                                                                                                                                                                 |
| 644.43 | 0.00 | 0.01  | 2.71   | 0.01 | 0.08  | 0.00 | D12:0-14:3D12:1-14:2                                                                                                                                                                                                                                         |
| 710.51 | 0.00 | 0.01  | 2.61   | 0.02 | 0.05  | 0.00 | A12:0-20:5A12:1-20:4A14:0-18:5A14:1-18:4A14:2-18:3A14:3-18:2A16:0-16:5A16:1-16:4A16:2-16:3P12:0-20:4P12:1-20:3P14:0-18:4P14:1-18:3P14:2-18:2P14:3-18:1P16:0-16:4P16:1-16:3P16:2-16:2                                                                         |
| 700.43 | 0.00 | 0.01  | 2.51   | 0.02 | 0.13  | 0.00 | A16:5-18:5P18:4-16:5                                                                                                                                                                                                                                         |
| 622.52 | 0.00 | 0.00  | 2.48   | 0.01 | 0.00  | 0.00 | A26:0                                                                                                                                                                                                                                                        |
| 712.53 | 0.00 | 0.00  | 2.43   | 0.04 | 0.33  | 0.00 | A12:0-20:4A12:1-20:3A14:0-18:4A14:1-18:3A14:2-18:2A14:3-18:1A16:0-16:4A16:1-16:3A16:2-16:2P12:0-20:3P12:1-20:2P14:0-18:3P14:1-18:2P14:2-18:1P14:3-18:0P16:0-16:3P16:1-16:2                                                                                   |
| 540.31 | 0.00 | 0.01  | 2.38   | 0.00 | 0.00  | 0.00 | D26:6                                                                                                                                                                                                                                                        |
| 666.41 | 0.00 | 0.00  | 2.30   | 0.01 | 0.00  | 0.00 | D12:1-16:5D14:3-14:3                                                                                                                                                                                                                                         |
| 526.33 | 0.00 | 0.00  | 2.23   | 0.03 | 0.17  | 0.00 | A20:6P20:5                                                                                                                                                                                                                                                   |
| 826.54 | 0.00 | 0.00  | 2.19   | 0.01 | 0.00  | 0.00 | D14:3-26:7D16:3-24:7D16:4-24:6D16:5-24:5D18:3-22:7D18:4-22:6D18:5-22:5D20:4-20:6D20:5-20:5                                                                                                                                                                   |
| 558.39 | 0.00 | 0.00  | 2.18   | 0.00 | 0.12  | 0.00 | A22:4P22:3                                                                                                                                                                                                                                                   |
| 764.56 | 0.00 | 0.00  | 2.16   | 0.16 | 0.00  | 0.00 | A12:0-24:6A12:1-24:5A14:0-22:6A14:1-22:5A14:2-22:4A14:3-22:3A16:0-20:6A16:1-20:5A16:2-20:4A16:3-20:3A16:4-20:2A16:5-20:1A18:1-18:5A18:2-18:4A18:3-18:3P12:0-24:5P12:1-24:4P14:0-22:5P14:1-22:4P14:2-22:3P14:3-22:2P16:0-20:5P16:1-20:4P1                     |
| 498.30 | 0.00 | 0.00  | 2.07   | 0.00 | 0.00  | 0.00 | P18:5                                                                                                                                                                                                                                                        |
| 804.68 | 0.00 | 0.00  | 2.00   | 0.00 | 0.03  | 0.01 | A12:0-26:0A14:0-24:0A16:0-22:0A18:0-20:0                                                                                                                                                                                                                     |
| 916.68 | 0.00 | 0.00  | 1.98   | 0.09 | 0.23  | 0.00 | D20:0-26:7D20:1-26:6D20:2-26:5D20:3-26:4D20:4-26:3D20:5-26:2D20:6-26:1D22:0-24:7D22:1-24:6D22:2-24:5D22:3-24:4D22:4-24:3D22:5-24:2D22:6-24:1D22:7-24:0                                                                                                       |
| 916.62 | 0.00 | 0.00  | 1.97   | 0.05 | 0.22  | 0.00 | A22:7-26:7A24:7-24:7P22:6-26:7P22:7-26:6P24:6-24:7                                                                                                                                                                                                           |
| 880.72 | 0.00 | 0.01  | 1.88   | 0.02 | 0.14  | 0.00 | A18:0-26:4A18:1-26:3A18:2-26:2A18:3-26:1A18:4-26:0A20:0-24:4A20:1-24:3A20:2-24:2A20:3-24:1A20:4-24:0A22:0-22:4A22:1-22:3A22:2-22:2P18:0-26:3P18:1-26:2P18:2-26:1P18:3-26:0P20:0-24:3P20:1-24:2P20:2-24:1P20:3-24:0P22:0-23:3P22:1-22:2                       |
| 904.74 | 0.00 | 0.00  | 1.83   | 0.00 | 0.03  | 0.00 | A20:0-26:6A20:1-26:5A20:2-26:4A20:3-26:3A20:4-26:2A20:5-26:1A20:6-26:0A22:0-24:6A22:1-24:5A22:2-24:4A22:3-24:3A22:4-24:2A22:5-24:1A22:6-24:0P20:0-26:5P20:1-26:4P20:2-26:3P20:3-26:2P20:4-26:1P20:5-26:0P22:0-24:5P22:1-24:4P22:2-24:3P2                     |
| 698.42 | 0.00 | 0.00  | 1.82   | 0.00 | 0.17  | 0.00 | P16:5-16:5                                                                                                                                                                                                                                                   |
| 844.62 | 0.00 | 0.01  | 1.71   | 0.03 | 0.13  | 0.00 | A16:1-26:7A16:2-26:6A16:3-26:5A16:4-26:4A16:5-26:3A18:1-24:7A18:2-24:6A18:3-24:5A18:4-24:4A18:5-24:3A20:1-22:7A20:2-22:6A20:3-22:5A20:4-22:4A20:5-22:3A20:6-22:2P16:0-26:7P16:1-26:6P16:2-26:5P16:3-26:4P16:4-26:3P16:5-26:2P18:0-24:7P1                     |
| 738.54 | 0.00 | 0.01  | 1.69   | 0.07 | 1.33  | 0.00 | A12:0-22:5A12:1-22:4A14:0-20:                                                                                                                                                                                                                                |

|        |      |       |      |      |       |      |                                                                                                                                                                                                                                                                                    |
|--------|------|-------|------|------|-------|------|------------------------------------------------------------------------------------------------------------------------------------------------------------------------------------------------------------------------------------------------------------------------------------|
| 952.72 | 0.00 | 0.00  | 1.51 | 0.03 | 0.15  | 0.00 | A24-3-26-7/A24-4-26-6/A24-5-26-5/A24-6-26-4/A24-7-26-3/P24-2-26-7/P24-3-26-6/P24-4-26-5/P24-5-26-4/P24-6-26-3/P24-7-26-2                                                                                                                                                           |
| 860.56 | 0.00 | 0.30  | 1.49 | 0.05 | 0.03  | 0.00 | A22-7-22-7/P20-6-24-7/P22-6-22-7                                                                                                                                                                                                                                                   |
| 502.33 | 0.00 | 0.00  | 1.49 | 0.02 | 0.00  | 0.00 | A18-4P18-3                                                                                                                                                                                                                                                                         |
| 952.77 | 0.00 | 0.00  | 1.48 | 0.04 | 4.83  | 0.00 | D22-0-26-3/D22-1-26-2/D22-2-26-1/D22-3-26-0/D24-0-24-3/D24-1-24-2                                                                                                                                                                                                                  |
| 974.76 | 0.00 | 0.01  | 1.47 | 0.05 | 0.02  | 0.00 | D24-0-26-6/D24-1-26-5/D24-2-26-4/D24-3-26-3/D24-4-26-2/D24-5-26-1/D24-6-26-0                                                                                                                                                                                                       |
| 860.82 | 0.00 | 0.29  | 1.47 | 0.05 | 0.03  | 0.00 | D16-0-26-7/D16-1-26-6/D16-2-26-5/D16-3-26-4/D16-4-26-3/D16-5-26-2/D16-0-24-7/D16-1-24-6/D16-2-24-5/D16-3-24-4/D16-4-24-3/D16-5-24-2/D20-0-22-7/D20-1-22-6/D20-2-22-5/D20-3-22-4/D20-4-22-3/D20-5-22-2/D20-6-22-1                                                                   |
| 854.57 | 0.00 | 0.00  | 1.44 | 0.00 | 0.22  | 0.00 | D16-3-26-7/D16-4-26-6/D16-5-26-5/D16-3-24-7/D16-4-24-6/D16-5-24-5/D20-3-22-7/D20-4-22-6/D20-5-22-5/D20-6-22-4                                                                                                                                                                      |
| 854.70 | 0.00 | 0.00  | 1.44 | 0.00 | 0.22  | 0.00 | D16-3-26-7/D16-4-26-6/D16-5-26-5/D16-3-24-7/D16-4-24-6/D16-5-24-5/D20-3-22-7/D20-4-22-6/D20-5-22-5/D20-6-22-4                                                                                                                                                                      |
| 824.52 | 0.00 | 0.01  | 1.43 | 0.02 | 0.11  | 0.00 | D16-4-24-7/D16-5-24-6/D16-4-22-7/D16-5-22-6/D20-5-20-6                                                                                                                                                                                                                             |
| 974.70 | 0.00 | 0.01  | 1.41 | 0.05 | 0.02  | 0.00 | A26-6-26-7/P26-5-26-7/P26-6-26-6                                                                                                                                                                                                                                                   |
| 962.66 | 0.00 | 0.00  | 1.39 | 0.03 | 0.01  | 0.00 | D24-5-26-7/D24-6-26-6/D24-7-26-5                                                                                                                                                                                                                                                   |
| 844.68 | 0.00 | 0.01  | 1.38 | 0.03 | 0.09  | 0.00 | D14-0-26-1/D14-1-26-0/D16-0-24-1/D16-1-24-0/D18-0-22-1/D18-1-22-0/D20-0-20-1                                                                                                                                                                                                       |
| 628.43 | 0.00 | 0.42  | 1.37 | 0.02 | 0.00  | 0.00 | A12-1-14-3/P12-0-14-3/P12-1-14-2                                                                                                                                                                                                                                                   |
| 628.43 | 0.00 | 0.42  | 1.37 | 0.02 | 0.00  | 0.00 | A12-1-14-3/P12-0-14-3/P12-1-14-2                                                                                                                                                                                                                                                   |
| 822.51 | 0.00 | 0.00  | 1.34 | 0.06 | 0.08  | 0.00 | D16-5-24-7/D18-5-22-7/D20-6-20-6                                                                                                                                                                                                                                                   |
| 956.80 | 0.00 | 0.00  | 1.34 | 0.03 | 0.08  | 0.00 | D22-0-26-1/D22-1-26-0/D24-0-24-1                                                                                                                                                                                                                                                   |
| 648.46 | 0.00 | 2.32  | 1.31 | 0.03 | 0.02  | 0.00 | D12-0-14-1/D12-1-14-0                                                                                                                                                                                                                                                              |
| 776.52 | 0.00 | 0.00  | 1.29 | 0.03 | 0.20  | 0.00 | D12-0-24-7/D12-1-24-6/D14-0-22-7/D14-1-22-6/D14-2-22-5/D14-3-22-4/D16-1-20-6/D16-2-20-5/D16-3-20-4/D16-4-20-3/D16-5-20-2/D18-2-18-5/D18-3-18-4                                                                                                                                     |
| 694.44 | 0.00 | 0.00  | 1.28 | 0.02 | 0.08  | 0.00 | D12-1-18-5/D14-1-16-5/D14-2-16-4/D14-3-16-3                                                                                                                                                                                                                                        |
| 804.55 | 0.00 | 0.00  | 1.27 | 0.00 | 0.00  | 0.00 | D12-0-26-7/D12-1-26-6/D14-0-24-7/D14-1-24-6/D14-2-24-5/D14-3-24-4/D16-0-22-7/D16-1-22-6/D16-2-22-5/D16-3-22-4/D16-4-22-3/D16-5-22-2/D18-1-20-6/D18-2-20-5/D18-3-20-4/D18-4-20-3/D18-5-20-2                                                                                         |
| 936.78 | 0.00 | 0.01  | 1.24 | 0.00 | 0.19  | 0.00 | A22-0-26-4/A22-1-26-3/A22-2-26-2/A22-3-26-1/A22-4-26-0/A24-0-24-4/A24-1-24-3/A24-2-24-2/P22-0-26-3/P22-1-26-2/P22-2-26-1/P22-3-26-0/P24-0-24-3/P24-1-24-2                                                                                                                          |
| 936.65 | 0.00 | 0.01  | 1.24 | 0.00 | 0.19  | 0.00 | D22-4-26-7/D22-5-26-6/D22-6-26-5/D22-7-26-4/D24-4-24-7/D24-5-24-6                                                                                                                                                                                                                  |
| 822.64 | 0.00 | 0.00  | 1.22 | 0.06 | 0.07  | 0.00 | A14-0-26-5/A14-1-26-4/A14-2-26-3/A14-3-26-2/A16-0-24-5/A16-1-24-4/A16-2-24-3/A16-3-24-2/A16-4-24-1/A16-5-24-0/A18-0-22-5/A18-1-22-4/A18-2-22-3/A18-3-22-2/A18-4-22-1/A18-5-22-0/A20-0-20-5/A20-1-20-4/A20-2-20-3/P14-0-26-4/P14-1-26-3/P14-2-26-2/P14-3-26-1/P14-4-26-0            |
| 906.60 | 0.00 | 0.01  | 1.14 | 0.01 | 0.05  | 0.00 | A26-5P26-4                                                                                                                                                                                                                                                                         |
| 926.76 | 0.00 | 0.01  | 1.12 | 0.03 | 0.00  | 0.00 | D20-9-26-7/D20-6-26-6/D20-5-24-7/D20-6-24-6/D22-7-24-7/D22-8-24-6                                                                                                                                                                                                                  |
| 852.68 | 0.00 | 0.00  | 1.11 | 0.05 | 0.07  | 0.00 | D20-9-26-7/D20-6-26-6/D20-5-24-7/D20-6-24-6/D22-7-24-7/D22-8-24-6                                                                                                                                                                                                                  |
| 674.42 | 0.00 | 0.00  | 1.10 | 0.03 | 0.08  | 0.01 | A16-0-26-4/A16-1-26-3/A16-2-26-2/A16-3-26-1/A16-4-26-0/A18-0-24-4/A18-1-24-3/A18-2-24-2/A18-3-24-1/A18-4-24-0/A20-0-22-4/A20-1-22-3/A20-2-22-2/A20-3-22-1/A20-4-22-0/P16-0-26-3/P16-1-26-2/P16-2-26-1/P16-3-26-0/P18-0-24-3/P18-1-24-2/P18-2-24-1/P18-3-24-0/P18-4-24-0            |
| 934.63 | 0.00 | 0.00  | 1.10 | 0.00 | 0.21  | 0.00 | D22-5-26-7/D22-6-26-6/D22-7-26-5/D24-5-24-7/D24-6-24-6                                                                                                                                                                                                                             |
| 818.61 | 0.00 | 0.41  | 1.07 | 2.51 | 0.00  | 0.00 | A14-0-26-7/A14-1-26-6/A14-2-26-5/A14-3-26-4/A16-0-24-7/A16-1-24-6/A16-2-24-5/A16-3-24-4/A16-4-24-3/A16-5-24-2/A18-0-22-7/A18-1-22-6/A18-2-22-5/A18-3-22-4/A18-4-22-3/A18-5-22-2/A20-1-20-6/A20-2-20-5/A20-3-20-4/P14-0-26-6/P14-1-26-5/P14-2-26-4/P14-3-26-3/P14-4-26-2            |
| 926.70 | 0.00 | 0.01  | 1.06 | 0.07 | 0.00  | 0.00 | A22-2-26-7/A22-3-26-6/A22-4-26-5/A22-5-26-4/A22-6-26-3/A22-7-26-2/A24-2-24-7/A24-3-24-6/A24-4-24-5/P22-1-26-7/P22-2-26-6/P22-3-26-5/P22-4-26-4/P22-5-26-3/P22-6-26-2/P22-7-26-1/P24-1-24-7/P24-2-24-6/P24-3-24-5/P24-4-24-4                                                        |
| 506.36 | 0.00 | 0.01  | 1.06 | 0.02 | 0.20  | 0.00 | A18-2P18-1                                                                                                                                                                                                                                                                         |
| 840.59 | 0.00 | 0.00  | 1.05 | 0.00 | 0.09  | 0.00 | A16-3-26-7/A16-4-26-6/A16-5-26-5/A18-3-24-7/A18-4-24-6/A18-5-24-5/A20-3-22-7/A20-4-22-6/A20-5-22-5/A20-6-22-4/P16-0-26-7/P16-3-26-6/P16-4-26-5/P16-5-26-4/P18-2-24-7/P18-3-24-6/P18-4-24-5/P18-5-24-4/P20-2-22-7/P20-3-22-6/P20-4-22-5/P20-5-22-4/P20-6-22-3                       |
| 878.70 | 0.00 | 0.01  | 1.05 | 0.03 | 0.15  | 0.00 | A18-0-26-5/A18-1-26-4/A18-2-26-3/A18-3-26-2/A18-4-26-1/A18-5-26-0/A20-0-24-5/A20-1-24-4/A20-2-24-3/A20-3-24-2/A20-4-24-1/A20-5-24-0/A20-6-24-0/A22-0-22-5/A22-1-22-4/A22-2-22-3/P18-0-26-4/P18-1-26-3/P18-2-26-2/P18-3-26-1/P18-4-26-0/P24-0-24-4/P20-1-24-3/P20-2-24-2/P20-3-24-1 |
| 840.65 | 0.00 | 0.00  | 1.05 | 0.00 | 0.09  | 0.00 | D14-0-26-3/D14-1-26-2/D14-2-26-1/D14-3-26-0/D16-0-24-3/D16-1-24-2/D16-2-24-1/D16-3-24-0/D18-0-22-3/D18-1-22-2/D18-2-22-1/D18-3-22-0/D20-0-20-3/D20-1-20-2                                                                                                                          |
| 828.68 | 0.00 | 0.01  | 0.99 | 0.04 | 0.14  | 0.00 | A14-0-26-2/A14-1-26-1/A14-2-26-0/A16-0-24-2/A16-1-24-1/A16-2-24-0/A18-0-22-2/A18-1-22-1/A18-2-22-0/A20-0-20-2/A20-1-20-1/P14-0-26-1/P14-1-26-0/P16-0-24-1/P16-1-24-0/P18-0-22-1/P18-1-22-0/P20-0-20-1                                                                              |
| 634.48 | 0.00 | 0.01  | 0.92 | 0.01 | 0.03  | 0.00 | A12-0-14-1/A12-1-14-0/P12-0-14-0                                                                                                                                                                                                                                                   |
| 634.48 | 0.00 | 0.01  | 0.92 | 0.01 | 0.03  | 0.00 | A12-0-14-1/A12-1-14-0/P12-0-14-0                                                                                                                                                                                                                                                   |
| 912.65 | 0.00 | 0.00  | 0.92 | 0.01 | 0.00  | 0.00 | D20-2-26-7/D20-3-26-6/D20-4-26-5/D20-5-26-4/D20-6-26-3/D22-2-24-7/D22-3-24-6/D22-4-24-5/D22-5-24-4/D22-6-24-3/D22-7-24-2                                                                                                                                                           |
| 912.78 | 0.00 | 0.01  | 0.92 | 0.00 | 0.00  | 0.00 | A20-0-26-2/A20-1-26-1/A20-2-26-0/A22-0-24-2/A22-1-24-1/A22-2-24-0/P20-0-26-1/P20-1-26-0/P20-2-26-1/P20-3-26-0/P20-4-26-1/P20-5-26-0/P20-6-26-1/P20-7-26-0                                                                                                                          |
| 694.50 | 0.00 | 0.00  | 0.84 | 0.02 | 0.09  | 0.00 | A12-0-18-4/A12-1-18-3/A14-0-16-4/A14-1-16-3/A14-2-16-2/A14-3-16-1/P12-0-18-3/P12-1-18-2/P14-0-16-3/P14-1-16-2/P14-2-16-1/P14-3-16-0                                                                                                                                                |
| 594.36 | 0.00 | 0.00  | 0.84 | 0.00 | 0.00  | 0.00 | D24-7                                                                                                                                                                                                                                                                              |
| 960.65 | 0.00 | 0.01  | 0.80 | 0.03 | 0.08  | 0.00 | D24-4-26-7/D24-7-26-6                                                                                                                                                                                                                                                              |
| 620.43 | 0.00 | 0.01  | 0.78 | 0.02 | 0.13  | 0.01 | D12-0-12-1                                                                                                                                                                                                                                                                         |
| 894.64 | 0.00 | 0.00  | 0.77 | 0.03 | 0.26  | 0.00 | A20-4-26-7/A20-5-26-6/A20-6-26-5/A22-4-24-7/A22-5-24-6/A22-6-24-5/A22-7-24-4/P20-3-26-7/P20-4-26-6/P20-5-26-5/P20-6-26-4/P22-3-24-7/P22-4-24-6/P22-5-24-5/P22-6-24-4/P22-7-24-3                                                                                                    |
| 882.73 | 0.00 | 0.00  | 0.77 | 0.07 | 0.21  | 0.00 | A18-0-26-3/A18-1-26-2/A18-2-26-1/A18-3-26-0/A20-0-24-3/A20-1-24-2/A20-2-24-1/A20-3-24-0/A22-0-22-3/A22-1-22-2/P18-0-26-2/P18-1-26-1/P18-2-26-0/P20-0-24-2/P20-1-24-1/P20-2-24-0/P22-0-22-2/P22-1-22-1                                                                              |
| 594.49 | 0.00 | 0.00  | 0.74 | 0.00 | 0.06  | 0.00 | A24-0                                                                                                                                                                                                                                                                              |
| 650.48 | 0.00 | 0.00  | 0.74 | 0.02 | 0.00  | 0.00 | D12-0-14-0                                                                                                                                                                                                                                                                         |
| 650.42 | 0.00 | 0.00  | 0.73 | 0.02 | 0.70  | 0.00 | P12-1-16-5/P14-3-14-3                                                                                                                                                                                                                                                              |
| 852.55 | 0.00 | 0.00  | 0.70 | 0.04 | 0.06  | 0.00 | D16-4-26-7/D16-5-26-6/D18-4-24-7/D18-5-24-6/D20-4-22-7/D20-5-22-6/D20-6-22-5                                                                                                                                                                                                       |
| 532.38 | 0.00 | 0.01  | 0.69 | 0.04 | 0.15  | 0.00 | A20-3P20-2                                                                                                                                                                                                                                                                         |
| 820.62 | 0.00 | 0.30  | 0.64 | 0.00 | 0.00  | 0.00 | A14-0-26-6/A14-1-26-5/A14-2-26-4/A14-3-26-3/A16-0-24-6/A16-1-24-5/A16-2-24-4/A16-3-24-3/A16-4-24-2/A16-5-24-1/A18-0-22-6/A18-1-22-5/A18-2-22-4/A18-3-22-3/A18-4-22-2/A18-5-22-1/A20-0-20-6/A20-1-20-5/A20-2-20-4/A20-3-20-3/8 Others                                               |
| 964.68 | 0.00 | 0.00  | 0.63 | 0.00 | 0.25  | 0.00 | D24-4-26-7/D24-5-26-6/D24-6-26-5/D24-7-26-4                                                                                                                                                                                                                                        |
| 860.75 | 0.00 | 0.40  | 0.45 | 0.05 | 0.09  | 0.00 | A16-0-26-0/A18-0-24-0/A20-0-22-0                                                                                                                                                                                                                                                   |
| 674.48 | 0.00 | 0.00  | 0.16 | 0.02 | 0.07  | 0.01 | D12-0-16-2/D12-1-16-1/D14-0-14-2/D14-1-14-1                                                                                                                                                                                                                                        |
| 620.50 | 0.00 | 0.00  | 0.15 | 0.02 | 0.13  | 0.01 | A26-1P26-0                                                                                                                                                                                                                                                                         |
| 900.65 | 0.00 | 0.00  | 0.09 | 0.02 | 0.17  | 0.00 | A12-0-26-2/A12-1-26-1/A14-0-24-2/A14-1-24-1/A14-2-24-0/A16-0-22-2/A16-1-22-1/A16-2-22-0/A18-0-20-2/A18-1-20-1/A18-2-20-0/P10-0-26-1/P10-1-26-0/P14-0-24-1/P14-1-24-0/P16-0-22-1/P16-1-22-0/P18-0-20-1/P18-1-20-0                                                                   |
| 708.50 | 0.00 | 0.00  | 0.06 | 0.03 | 0.00  | 0.00 | A12-0-20-6/A12-1-20-5/A14-1-18-5/A14-2-18-4/A14-3-18-3/A16-1-16-5/A16-2-16-4/A16-3-16-3/P12-0-20-5/P12-1-20-4/P14-0-18-5/P14-1-18-4/P14-2-18-3/P14-3-18-2/P16-0-18-5/P16-1-18-4/P16-2-18-3                                                                                         |
| 968.84 | 0.00 | 0.00  | 0.02 | 0.06 | 0.34  | 0.00 | D24-0-26-3/A24-1-26-2/A24-2-26-1/A24-3-26-0/P24-0-26-1/P24-1-26-0                                                                                                                                                                                                                  |
| 818.66 | 0.00 | 0.42  | 0.00 | 2.46 | 0.00  | 0.00 | D12-0-26-6/D14-0-24-0/D16-0-22-0/D18-0-20-0                                                                                                                                                                                                                                        |
| 692.56 | 0.00 | 0.01  | 0.00 | 0.89 | 0.06  | 0.00 | A12-0-18-0/A14-0-16-0                                                                                                                                                                                                                                                              |
| 996.74 | 0.00 | 0.00  | 0.00 | 0.08 | 0.01  | 0.00 | D26-3-26-7/D26-3-26-6/D26-4-26-5                                                                                                                                                                                                                                                   |
| 882.60 | 0.00 | 0.00  | 0.00 | 0.07 | 0.23  | 0.00 | D18-3-26-7/D18-4-26-6/D18-5-26-5/D20-3-24-7/D20-4-24-6/D20-5-24-5/D20-6-24-4/D22-3-22-7/D22-4-22-6/D22-5-22-5                                                                                                                                                                      |
| 996.87 | 0.00 | 0.01  | 0.00 | 0.05 | 0.08  | 0.00 | A26-0-26-2/A26-1-26-1/P26-0-26-1                                                                                                                                                                                                                                                   |
| 466.29 | 0.00 | 0.01  | 0.00 | 0.03 | 0.00  | 0.00 | D14-1                                                                                                                                                                                                                                                                              |
| 830.70 | 0.00 | 0.09  | 0.00 | 0.03 | 0.04  | 0.00 | A14-0-26-1/A14-1-26-0/A16-0-24-1/A16-1-24-0/A18-0-22-1/A18-1-22-0/A20-0-20-1/P14-0-26-0/P16-0-24-0/P18-0-22-0/P20-0-20-0                                                                                                                                                           |
| 960.78 | 0.00 | 0.01  | 0.00 | 0.03 | 0.09  | 0.00 | A24-0-26-6/A24-1-26-5/A24-2-26-4/A24-3-26-3/A24-4-26-2/A24-5-26-1/A24-6-26-0/P24-0-26-5/P24-1-26-4/P24-2-26-3/P24-3-26-2/P24-4-26-1/P24-5-26-0                                                                                                                                     |
| 874.54 | 0.00 | 0.00  | 0.00 | 0.03 | 4.89  | 0.00 | D22-7-22-7                                                                                                                                                                                                                                                                         |
| 874.67 | 0.00 | 0.00  | 0.00 | 0.03 | 3.92  | 0.00 | A18-0-26-7/A18-1-26-6/A18-2-26-5/A18-3-26-4/A18-4-26-3/A18-5-26-2/A20-0-24-7/A20-1-24-6/A20-2-24-5/A20-3-24-4/A20-4-24-3/A20-5-24-2/A20-6-24-1/8 Others                                                                                                                            |
| 874.73 | 0.00 | 0.00  | 0.00 | 0.03 | 3.84  | 0.00 | D16-0-26-0/D18-0-24-0/D20-0-22-0                                                                                                                                                                                                                                                   |
| 998.89 | 0.00 | 0.00  | 0.00 | 0.02 | 0.04  | 0.00 | A26-0-26-1/P26-0-26-0                                                                                                                                                                                                                                                              |
| 890.61 | 0.00 | 0.01  | 0.00 | 0.02 | 0.01  | 0.00 | A20-6-26-7/A22-6-24-7/A22-7-24-6/P20-5-26-7/P20-6-26-6/P22-5-24-7/P22-6-24-6/P22-7-24-5                                                                                                                                                                                            |
| 798.51 | 0.00 | 0.00  | 0.00 | 0.02 | 5.77  | 0.40 | D14-3-24-7/D18-3-22-7/D16-4-22-6/D16-5-22-5/D18-4-20-6/D18-5-20-5                                                                                                                                                                                                                  |
| 604.43 | 0.00 | 0.00  | 0.00 | 0.02 | 0.11  | 0.00 | A12-1-12-1/P12-0-12-1                                                                                                                                                                                                                                                              |
| 604.43 | 0.00 | 0.00  | 0.00 | 0.02 | 0.11  | 0.00 | A12-1-12-1/P12-0-12-1                                                                                                                                                                                                                                                              |
| 704.47 | 0.00 | 58.36 | 0.00 | 0.00 | 84.29 | 0.00 | A14-3-18-5/A16-3-16-5/A16-4-16-4/P12-1-20-6/P14-2-18-5/P14-3-18-4/P16-2-16-5/P16-3-16-4                                                                                                                                                                                            |
| 704.52 | 0.00 | 57.73 | 0.00 | 0.00 | 91.91 | 0.00 | D12-0-18-1/D12-1-18-0/D14-0-16-1/D14-1-16-0                                                                                                                                                                                                                                        |
| 790.58 | 0.00 | 0.90  | 0.00 | 0.00 | 1.81  | 0.00 | A12-0-26-7/A12-1-26-6/A14-0-24-7/A14-1-24-6/A14-2-24-5/A14-3-24-4/A16-0-22-7/A16-1-22-6/A16-2-22-5/A16-3-22-4/A16-4-22-3/A16-5-22-2/A18-1-20-6/A18-2-20-5/A18-3-20-4/A18-4-20-3/8 Others                                                                                           |
| 714.54 | 0.00 | 0.11  | 0.00 | 0.00 | 24.80 | 0.00 | A12-0-30-3/A12-1-30-2/A14-0-18-3/A14-1-18-2/A14-2-18-1/A14-3-18-0/A16-0-16-3/A16-1-16-2/P12-0-30-2/P12-1-30-1/P14-0-18-2/P14-1-18-1/P14-2-18-0/P16-0-16-2/P16-1-16-1                                                                                                               |
| 970.73 | 0.00 | 0.00  | 0.00 | 0.00 | 0.08  | 0.00 | D24-1-26-7/D24-2-26-6/D24-3-26-5/D24-4-26-4/D24-5-26-3/D24-6-26-2/D24-7-26-1                                                                                                                                                                                                       |
| 970.67 | 0.00 | 0.00  | 0.00 | 0.00 |       |      |                                                                                                                                                                                                                                                                                    |
